# Supplementary material for: Lasiodipline G and other diketopiperazine metabolites produced by Lasiodiplodia chiangraiensis
Source: Royal Society of Chemistry journal article supplement (doi:10.1039/d3ra03242f), 2023-01-01
Supplement: d3ra03242f1.pdf [file d3ra03242f1.pdf]

## Supplementary Materials for

### Lasiodipline G and other diketopiperazine metabolites produced by

#### *Lasiodiplodia chiangraiensis*

Sarunpron Khruengsai<sup>a,b</sup>, Patcharee Pripdeevecha<sup>a,b,c</sup>, Chutima Tanapichatsakul<sup>b</sup>, Winnie Chemutai Sum<sup>a</sup>, Mahmoud A. A. Ibrahim<sup>d,e</sup>, Marc Stadler<sup>a</sup> and Sherif S. Ebada<sup>a,f,\*</sup>

---

<sup>a</sup>Department of Microbial Drugs, Helmholtz Centre for Infection Research GmbH (HZI), Inhoffenstraße 7, 38124 Braunschweig, Germany; <sup>b</sup>School of Science, Mae Fah Luang University, Chiang Rai, Thailand; <sup>c</sup>Center of Chemical Innovation for Sustainability (CIS), Mae Fah Luang University, Chiang Rai, Thailand; <sup>d</sup>Computational Chemistry Laboratory, Chemistry Department, Faculty of Science, Minia University, Minia 61519, Egypt; <sup>e</sup>School of Health Sciences, University of KwaZulu-Natal, Westville, Durban 4000, South Africa; <sup>f</sup>Department of Pharmacognosy, Faculty of Pharmacy, Ain-Shams University, Abbasia, 11566 Cairo, Egypt.

\* Correspondence: [sherif.elsayed@helmholtz-hzi.de](mailto:sherif.elsayed@helmholtz-hzi.de); [sherif\\_elsayed@pharma.asu.edu.eg](mailto:sherif_elsayed@pharma.asu.edu.eg) (S.S.E.)

## ABSTRACT

*Lasiodiplodia* fungi are known to colonize plants as both pathogens and/or endophytes; hence, they can be exploited for their beneficial roles. Many compound classes from the genus have exhibited their potential biotechnological applications. Herein, we report two new metabolites **1** and **2** together with three known cyclo-(D-Ala-D-Trp) (**3**), indole-3-carboxylic acid (**4**) and a cyclic pentapeptide clavatustide B (**5**), isolated from the submerged cultures of a recently described species *L. chiangraiensis*. Chemical structures of the isolated compounds were determined by extensive NMR spectroscopic analyses together with HRESIMS. The absolute configurations of the new compounds were established based on comparing experimental and calculated time-dependent density functional theory circular dichroism (TDDFT-ECD) spectra. Compound **1** exhibited significant cytotoxic activities against an array of cell lines with IC<sub>50</sub> values of 2.9-12.6 μM, as well as moderate antibacterial effects.

**Keywords:** *Lasiodiplodia*, new species, diketopiperazine, cytotoxic, antimicrobial.

## Contents of Supporting Information

| #  | Contents                                                                                                            | Page |
|----|---------------------------------------------------------------------------------------------------------------------|------|
| 1  | Table S1. 2D (COSY, HMBC and ROESY) NMR correlations of <b>1</b> .                                                  | S4   |
| 2  | Table S2. 2D (COSY, HMBC and ROESY) NMR correlations of <b>2</b> .                                                  | S4   |
| 3  | Table S3. Cytotoxicity (IC <sub>50</sub> ) and antimicrobial activity (MIC) of <b>1-4</b> .                         | S5   |
| 4  | Figure S1. HPLC chromatogram of <i>Lasiodiplodia chiangraiensis</i> cultured on cotton seed (Q6 ½) medium.          | S5   |
| 5  | Figure S2. HPLC chromatogram, UV and LRESIMS spectra of <b>1</b> .                                                  | S6   |
| 6  | Figure S3. HPLC chromatogram, UV and HRESIMS spectra of <b>1</b> .                                                  | S7   |
| 7  | Figure S4. <sup>1</sup> H NMR spectrum of <b>1</b> in methanol- <i>d</i> <sub>4</sub> at 700 MHz.                   | S8   |
| 8  | Figure S5. <sup>13</sup> C NMR spectrum of <b>1</b> in methanol- <i>d</i> <sub>4</sub> at 175 MHz.                  | S9   |
| 9  | Figure S6. <sup>1</sup> H- <sup>1</sup> H COSY spectrum of <b>1</b> in methanol- <i>d</i> <sub>4</sub> at 700 MHz.  | S10  |
| 10 | Figure S7. HMBC spectrum of <b>1</b> in methanol- <i>d</i> <sub>4</sub> at 700 MHz.                                 | S11  |
| 11 | Figure S8. HSQC spectrum of <b>1</b> in methanol- <i>d</i> <sub>4</sub> at 700 MHz.                                 | S12  |
| 12 | Figure S9. ROESY spectrum of <b>1</b> in methanol- <i>d</i> <sub>4</sub> at 700 MHz.                                | S13  |
| 13 | Figure S10. <sup>1</sup> H NMR spectrum of <b>1</b> in DMSO- <i>d</i> <sub>6</sub> at 700 MHz.                      | S14  |
| 14 | Figure S11. HPLC chromatogram, UV and LRESIMS spectra of <b>2</b> .                                                 | S15  |
| 15 | Figure S12. HPLC chromatogram, UV and HRESIMS spectra of <b>2</b> .                                                 | S15  |
| 16 | Figure S13. <sup>1</sup> H NMR spectrum of <b>2</b> in methanol- <i>d</i> <sub>4</sub> at 700 MHz.                  | S16  |
| 17 | Figure S14. <sup>1</sup> H- <sup>1</sup> H COSY spectrum of <b>2</b> in methanol- <i>d</i> <sub>4</sub> at 700 MHz. | S17  |
| 18 | Figure S15. HMBC spectrum of <b>2</b> in methanol- <i>d</i> <sub>4</sub> at 700 MHz.                                | S18  |
| 19 | Figure S16. HSQC spectrum of <b>2</b> in methanol- <i>d</i> <sub>4</sub> at 700 MHz.                                | S19  |
| 20 | Figure S17. <sup>1</sup> H NMR spectrum of <b>2</b> in DMSO- <i>d</i> <sub>6</sub> at 700 MHz.                      | S20  |
| 21 | Figure S18. <sup>13</sup> C NMR spectrum of <b>2</b> in DMSO- <i>d</i> <sub>6</sub> at 175 MHz.                     | S21  |
| 22 | Figure S19. <sup>1</sup> H- <sup>1</sup> H COSY spectrum of <b>2</b> in DMSO- <i>d</i> <sub>6</sub> at 700 MHz.     | S22  |
| 23 | Figure S20. ROESY spectrum of <b>2</b> in DMSO- <i>d</i> <sub>6</sub> at 700 MHz.                                   | S23  |
| 24 | Figure S21. HPLC chromatogram, UV and LRESIMS spectra of <b>3</b> .                                                 | S24  |
| 25 | Figure S22. HPLC chromatogram, UV and HRESIMS spectra of <b>3</b> .                                                 | S25  |
| 26 | Figure S23. <sup>1</sup> H NMR spectrum of <b>3</b> in methanol- <i>d</i> <sub>4</sub> at 700 MHz.                  | S26  |
| 27 | Figure S24. <sup>1</sup> H- <sup>1</sup> H COSY spectrum of <b>3</b> in methanol- <i>d</i> <sub>4</sub> at 700 MHz. | S27  |
| 28 | Figure S25. ROESY spectrum of <b>3</b> in methanol- <i>d</i> <sub>4</sub> at 700 MHz.                               | S28  |
| 29 | Figure S26. <sup>1</sup> H NMR spectrum of <b>3</b> in DMSO- <i>d</i> <sub>6</sub> at 700 MHz.                      | S29  |
| 30 | Figure S27. <sup>13</sup> C NMR spectrum of <b>3</b> in DMSO- <i>d</i> <sub>6</sub> at 175 MHz.                     | S30  |
| 31 | Figure S28. HPLC chromatogram, UV and LRESIMS spectra of <b>4</b> .                                                 | S31  |
| 32 | Figure S29. HPLC chromatogram, UV and HRESIMS spectra of <b>4</b> .                                                 | S32  |
| 33 | Figure S30. <sup>1</sup> H NMR spectrum of <b>4</b> in methanol- <i>d</i> <sub>4</sub> at 500 MHz.                  | S33  |
| 34 | Figure S31. HMBC spectrum of <b>4</b> in methanol- <i>d</i> <sub>4</sub> at 500 MHz.                                | S34  |
| 35 | Figure S32. HPLC chromatogram, UV and LRESIMS spectra of <b>5</b> .                                                 | S35  |
| 36 | Figure S33. HPLC chromatogram, UV and HRESIMS spectra of <b>5</b> .                                                 | S36  |
| 37 | Figure S34. <sup>1</sup> H NMR spectrum of <b>5</b> in methanol- <i>d</i> <sub>4</sub> at 700 MHz.                  | S37  |
| 38 | Figure S35. <sup>1</sup> H- <sup>1</sup> H COSY spectrum of <b>5</b> in methanol- <i>d</i> <sub>4</sub> at 700 MHz. | S38  |
| 39 | Figure S36. HMBC spectrum of <b>5</b> in methanol- <i>d</i> <sub>4</sub> at 700 MHz.                                | S39  |
| 40 | Figure S37. HSQC spectrum of <b>5</b> in methanol- <i>d</i> <sub>4</sub> at 700 MHz.                                | S40  |

Table S1. 2D (COSY, HMBC and ROESY) NMR correlations of **1** in methanol-*d*<sub>4</sub> at 700 MHz.

| Pos.  | <sup>1</sup> H- <sup>1</sup> H COSY <sup>a</sup> | HMBC <sup>a</sup>                                  | ROESY <sup>a</sup> |
|-------|--------------------------------------------------|----------------------------------------------------|--------------------|
| 1     |                                                  |                                                    |                    |
| 2     |                                                  |                                                    |                    |
| 4     |                                                  |                                                    |                    |
| 5     |                                                  |                                                    |                    |
| 6-NH  |                                                  |                                                    |                    |
| 7     | H-9w <sup>a</sup>                                | 4, 5, 8, 9, 16                                     | H-9, H-15          |
| 8     |                                                  |                                                    |                    |
| 9     | H-7w <sup>a</sup>                                | 7, 8, 11, 12w <sup>a</sup> , 15w <sup>a</sup> , 16 | H-7                |
| 10-NH |                                                  |                                                    |                    |
| 11    |                                                  |                                                    |                    |
| 12    | H-13, H-14w <sup>a</sup>                         | 14, 16                                             |                    |
| 13    | H-12, H-14                                       | 11, 12w <sup>a</sup> , 15                          |                    |
| 14    | H-13, H-15                                       | 11w <sup>a</sup> , 12, 16                          |                    |
| 15    | H-14, H-13w <sup>a</sup>                         | 8, 11, 13, 16w <sup>a</sup>                        | H-7                |
| 16    |                                                  |                                                    |                    |
| 2-Me  |                                                  | 1, 2                                               | 3-NMe              |
| 3-NMe |                                                  | 2, 4                                               | 2-Me               |

<sup>a</sup> "w" denotes weak correlation.

Table S2. 2D (COSY, HMBC and ROESY) NMR correlations of **2** in methanol-*d*<sub>4</sub> at 700 MHz.

| Pos.  | <sup>1</sup> H- <sup>1</sup> H COSY | HMBC                                                 | ROESY              |
|-------|-------------------------------------|------------------------------------------------------|--------------------|
| 1     |                                     |                                                      |                    |
| 2     | 2-CH <sub>3</sub>                   | C-1, 2-CH <sub>3</sub> , C-4                         | H-5                |
| 3-NOH |                                     |                                                      |                    |
| 4     |                                     |                                                      |                    |
| 5     |                                     | C-1, C-4, C-7, C-8,                                  | H-2                |
| 6-NH  |                                     |                                                      |                    |
| 7     |                                     | C-1w <sup>a</sup> , C-4, C-5, C-8, C-9, C-16         | H-15               |
| 8     |                                     |                                                      |                    |
| 9     | CH <sub>2</sub> -7w <sup>a</sup>    | C-5w <sup>a</sup> , C-7, C-8, C-11, C-16             |                    |
| 10-NH |                                     |                                                      |                    |
| 11    |                                     |                                                      |                    |
| 12    | H-13, H-14w <sup>a</sup>            | C-14, C-16                                           |                    |
| 13    | H-12, H-14, H-15w <sup>a</sup>      | C-11, C-12w <sup>a</sup> , C-14w <sup>a</sup> , C-15 |                    |
| 14    | H-12w <sup>a</sup> , H-13, H-15     | C-12, C-13w <sup>a</sup> , C-15w <sup>a</sup> , C-16 |                    |
| 15    | H-13w <sup>a</sup> , H-14, H-15     | C-8, C-11, C-13, C-16w <sup>a</sup>                  | CH <sub>2</sub> -7 |
| 16    |                                     |                                                      |                    |
| 2-Me  | H-2                                 | C-1, C-2                                             |                    |

<sup>a</sup> "w" denotes weak correlation.

Table S3. Cytotoxicity (IC<sub>50</sub>) and antimicrobial activity (MIC) of 1-4.

| Test Cell Line                            | IC <sub>50</sub> (μM) |      |      |      | Positive Control         |
|-------------------------------------------|-----------------------|------|------|------|--------------------------|
|                                           | 1                     | 2    | 3    | 4    | Epothilone B (μM)        |
| Mouse fibroblast (L929)                   | 5.8                   | n.a. | n.a. | 87   | 0.65                     |
| Human endocervical adenocarcinoma (KB3.1) | 8.4                   | n.a. | n.a. | n.a. | 0.17                     |
| Human prostate carcinoma (PC-3)           | 6.3                   | n.d. | n.d. | n.d. | 0.09                     |
| Human breast adenocarcinoma (MCF-7)       | 3.9                   | n.d. | n.d. | n.d. | 0.07                     |
| Human ovarian cancer (SKOV-3)             | 3.9                   | n.d. | n.d. | n.d. | 0.09                     |
| Human epidermoid carcinoma (A431)         | 2.9                   | n.d. | n.a. | n.a. | 0.06                     |
| Human lung carcinoma (A549)               | 12.6                  | n.d. | n.d. | n.d. | 0.05                     |
| Test Microorganism                        | MIC (μg/mL)           |      |      |      | Positive Control (μg/mL) |
| <i>Staphylococcus aureus</i>              | 33.3                  | n.i. | n.i. | n.i. | 0.21 <sup>G</sup>        |
| <i>Escherichia coli</i>                   | n.d.                  | n.i. | n.i. | n.i. | 0.83 <sup>G</sup>        |
| <i>Bacillus subtilis</i>                  | n.i.                  | n.i. | n.i. | n.i. | 16.6 <sup>O</sup>        |
| <i>Pseudomonas aeruginosa</i>             | n.d.                  | n.i. | n.i. | n.i. | 0.22 <sup>G</sup>        |
| <i>Pichia anomala</i>                     | n.d.                  | n.i. | 66.6 | n.i. | 4.20 <sup>N</sup>        |
| <i>Candida albicans</i>                   | n.d.                  | n.i. | n.i. | n.i. | 2.20 <sup>N</sup>        |
| <i>Acinetobacter baumannii</i>            | n.d.                  | n.i. | n.i. | n.i. | 0.52 <sup>C</sup>        |
| <i>Chromobacterium violaceum</i>          | n.d.                  | n.i. | n.i. | n.i. | 1.70 <sup>G</sup>        |
| <i>Schizosaccharomyces pombe</i>          | n.d.                  | n.i. | n.i. | n.i. | 2.10 <sup>N</sup>        |
| <i>Mucor hiemalis</i>                     | n.d.                  | n.i. | n.i. | n.i. | 2.10 <sup>N</sup>        |
| <i>Rhodotorula glutinis</i>               | n.d.                  | n.i. | n.i. | n.i. | 2.30 <sup>N</sup>        |
| <i>Mycobacterium smegmatis</i>            | n.d.                  | n.i. | n.i. | n.i. | 1.70 <sup>K</sup>        |

n.a.: No activity. n.i.: No inhibition up to 67 μg/mL. n.d.: Not determined.

G: Gentamycin; O: Oxytetracycline; N: Nystatin; C: Ciprofloxacin; K: Kanamycin.

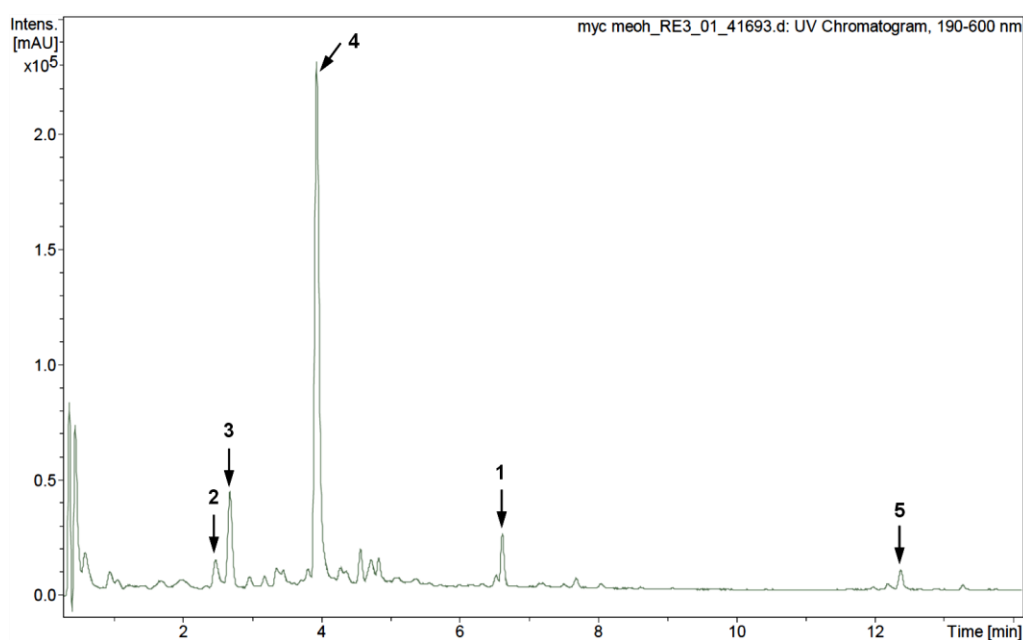

Figure S1. HPLC chromatogram of *Lasiodiplodia chiangraiensis* cultured on cotton seed (Q6) medium.

# Generic Display Report

## Analysis Info

Analysis Name S:\DATA\AmaZon\gkh22\_Gicky Khruengsaï\21-00003 gillson\_2nd\21-0003 B16\_BC2\_01\_42942.d  
Method 42942.m  
Sample Name 21-0003 B16  
Comment

Acquisition Date 11.11.2022 00:41:29  
Operator esu  
Instrument amaZon speed

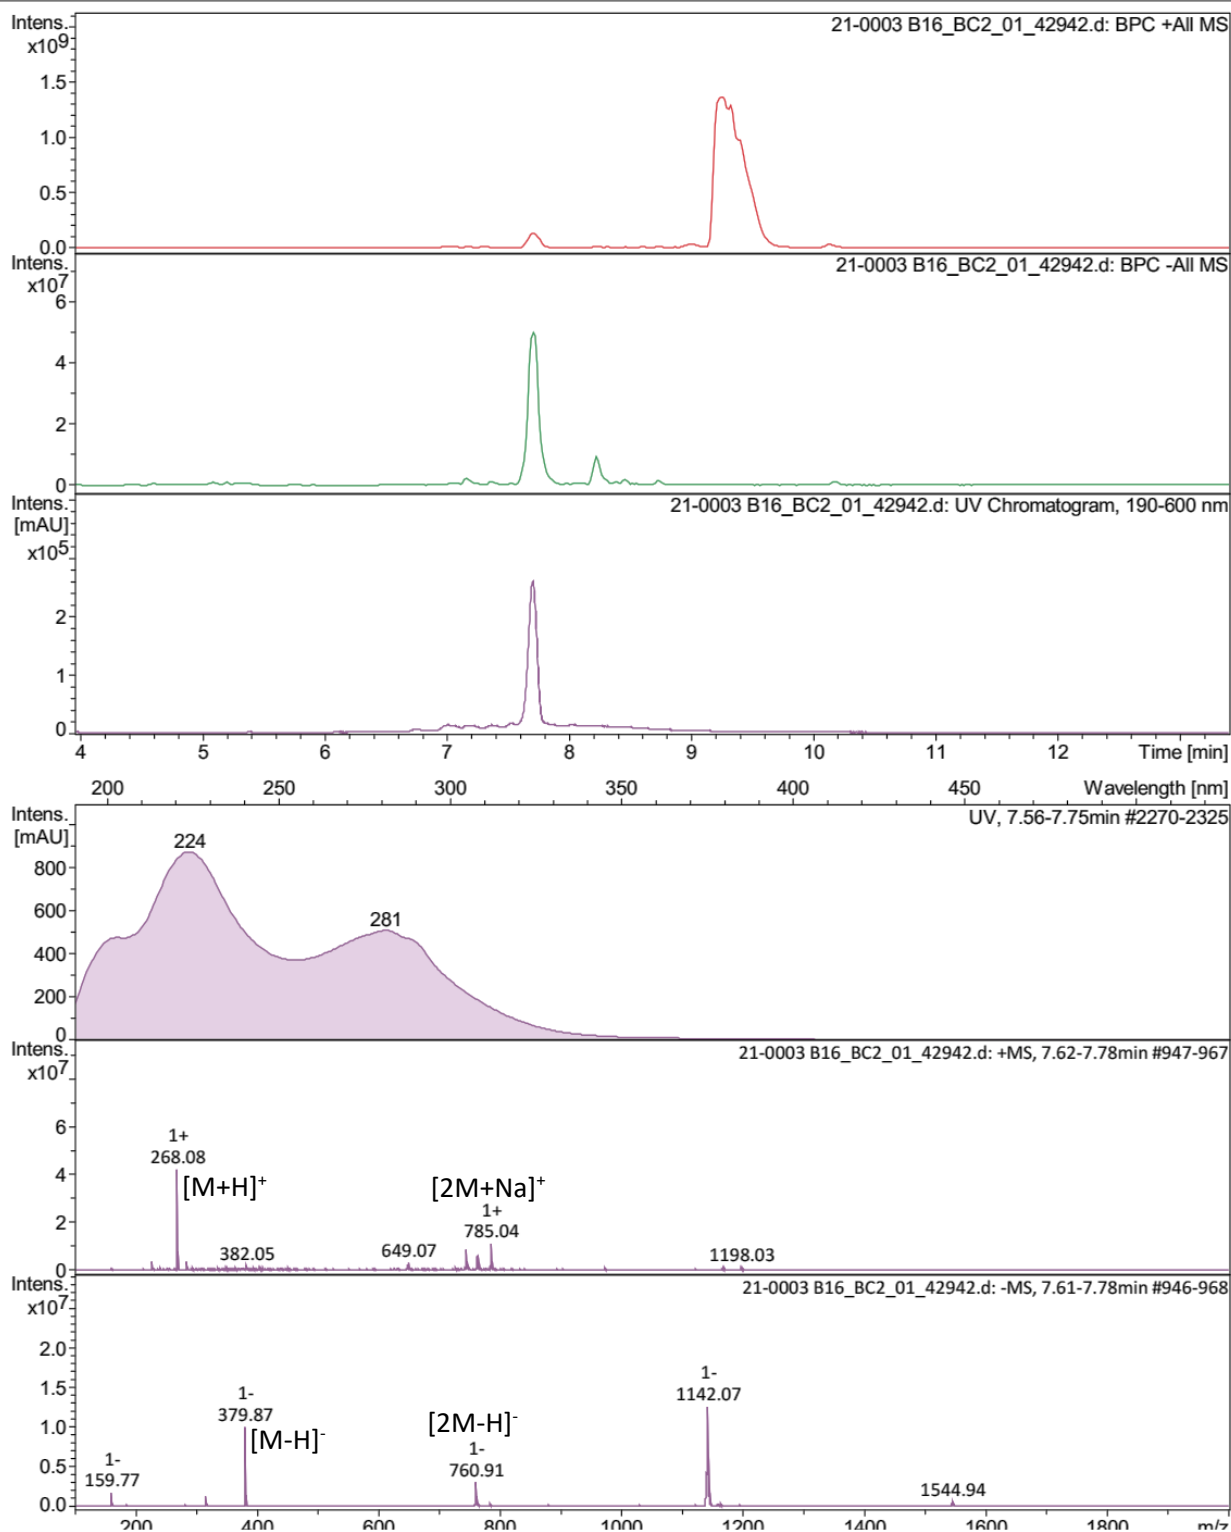

Figure S2. LRESIMS of **1**.

# Generic Display Report

## Analysis Info

Acquisition Date 22.11.2022 18:53:35  
Analysis Name S:\DATA\MaXis\sel22\_SherifElsayed\22\_11\21-003\_B16\_18\_01\_11049.d  
Method pos\_säure\_10000\_screening\_ms\_100\_2500\_line.m Operator ate06  
Sample Name 21-003\_B16 Instrument maXis  
Comment Screening01  
Waters Acquity UPLC BEH C<sub>18</sub> 1,7um 2.1x50mm

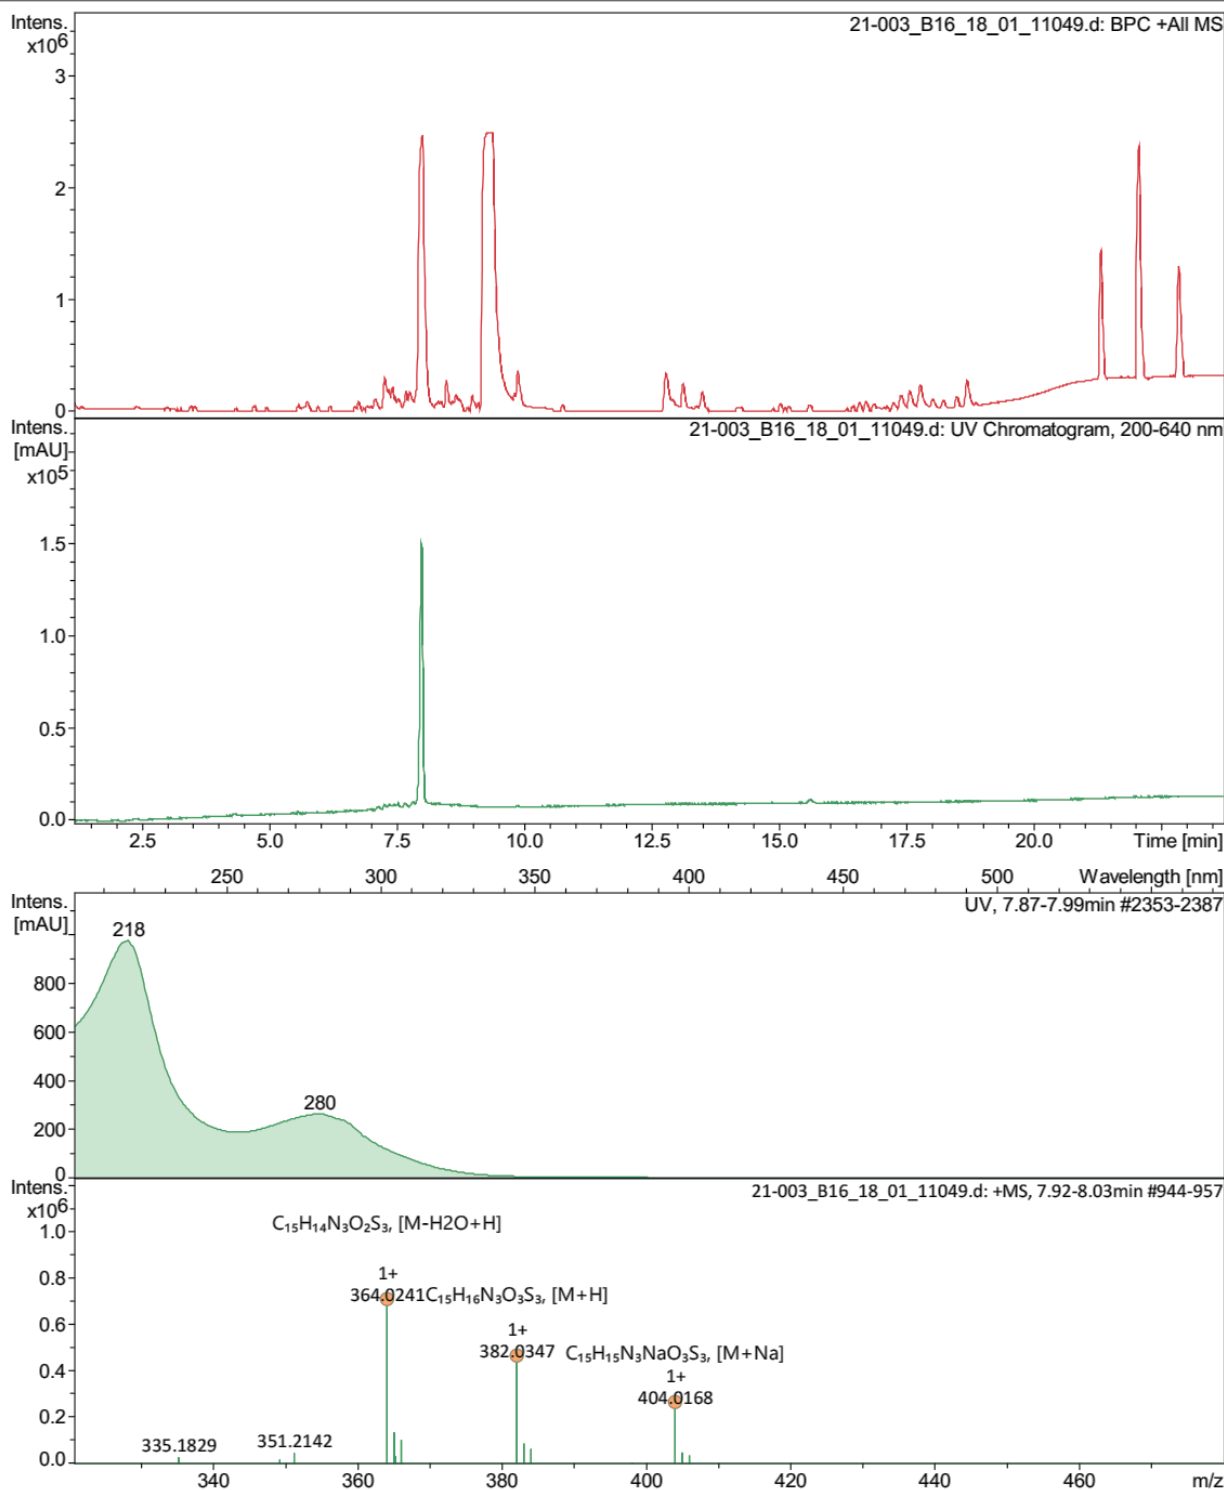

Figure S3. HRESIMS of 1.

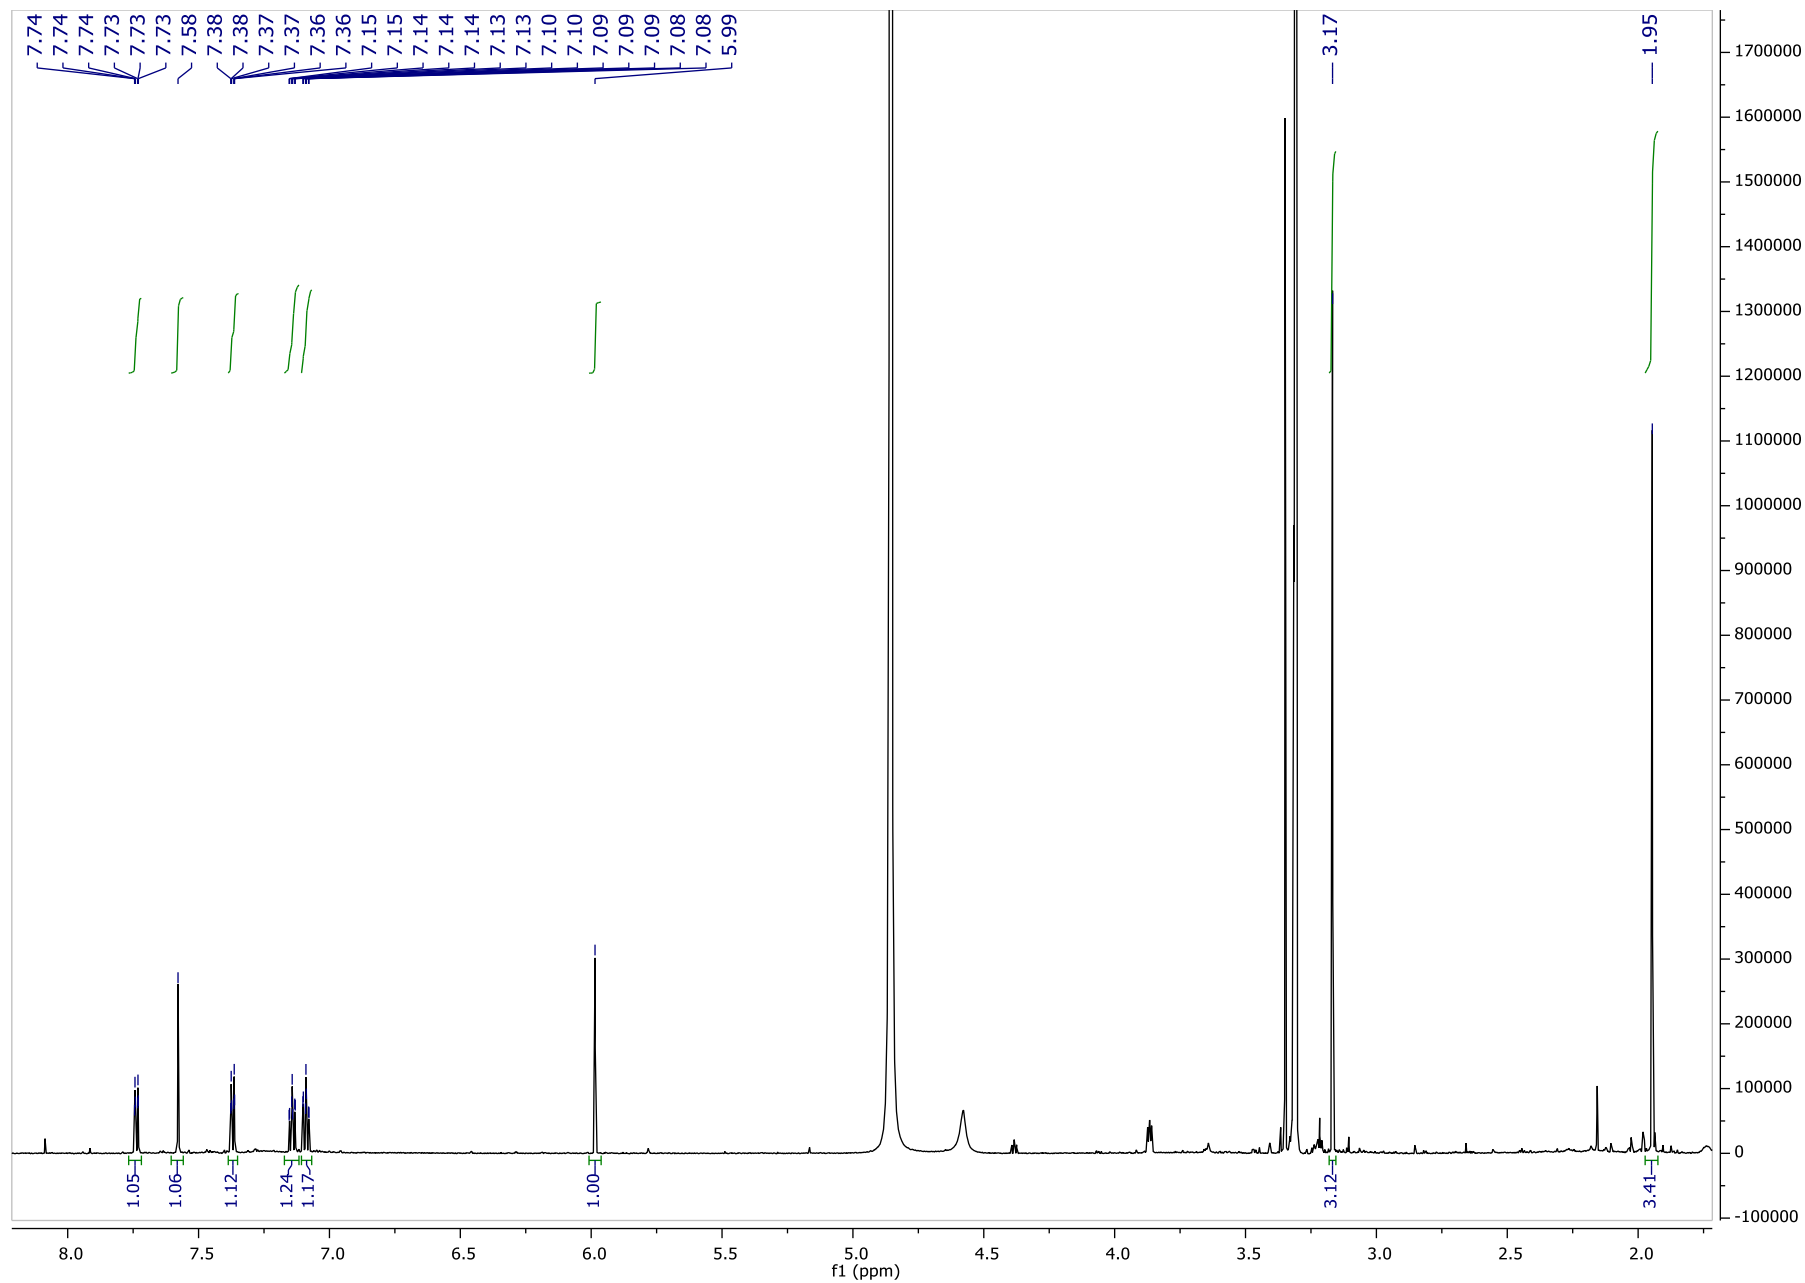

Figure S4.  $^1\text{H}$  NMR spectrum of **1** in methanol- $d_4$  at 700 MHz.



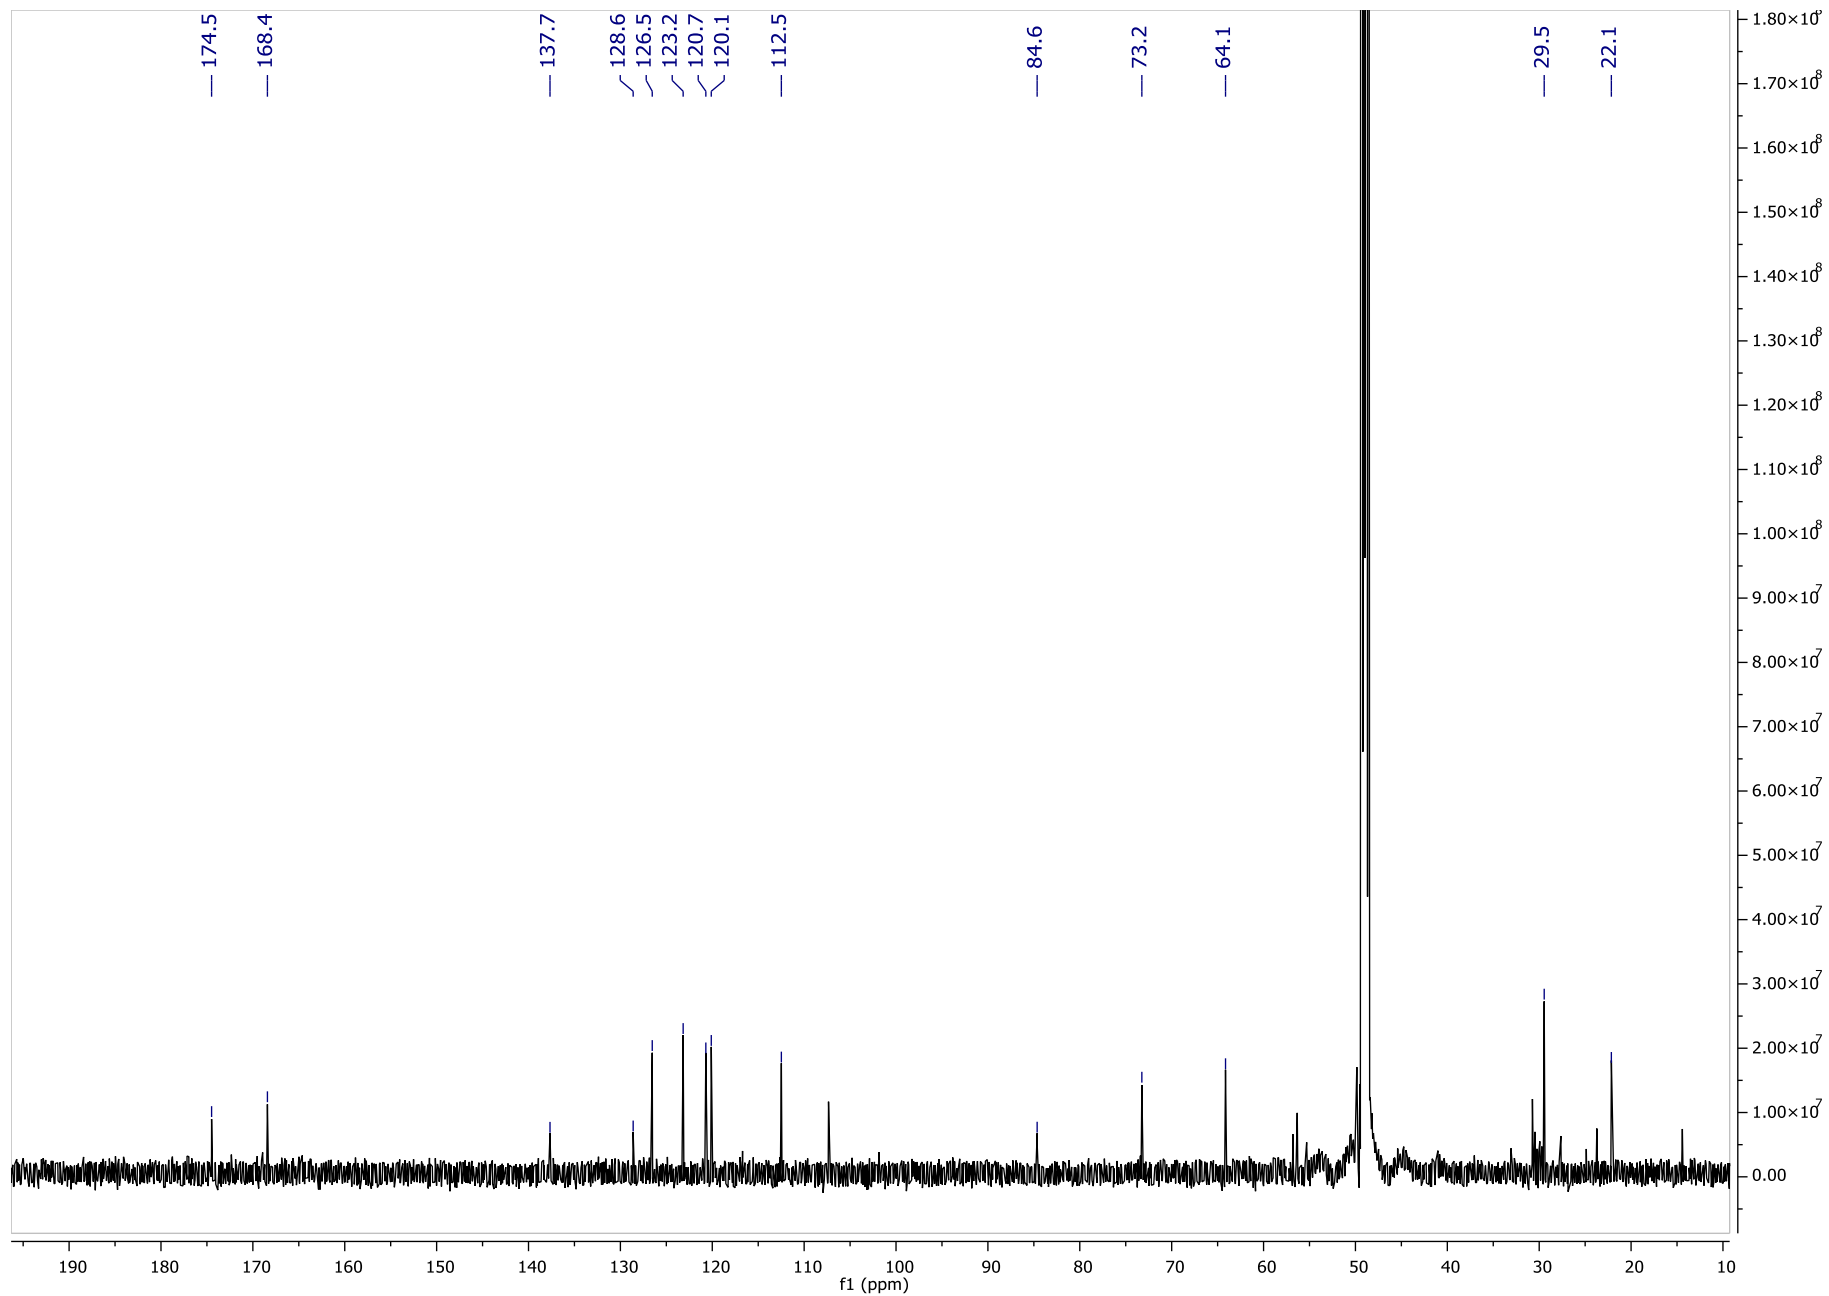

Figure S5.  $^{13}\text{C}$  NMR spectrum of **1** in methanol- $d_4$  at 175 MHz.

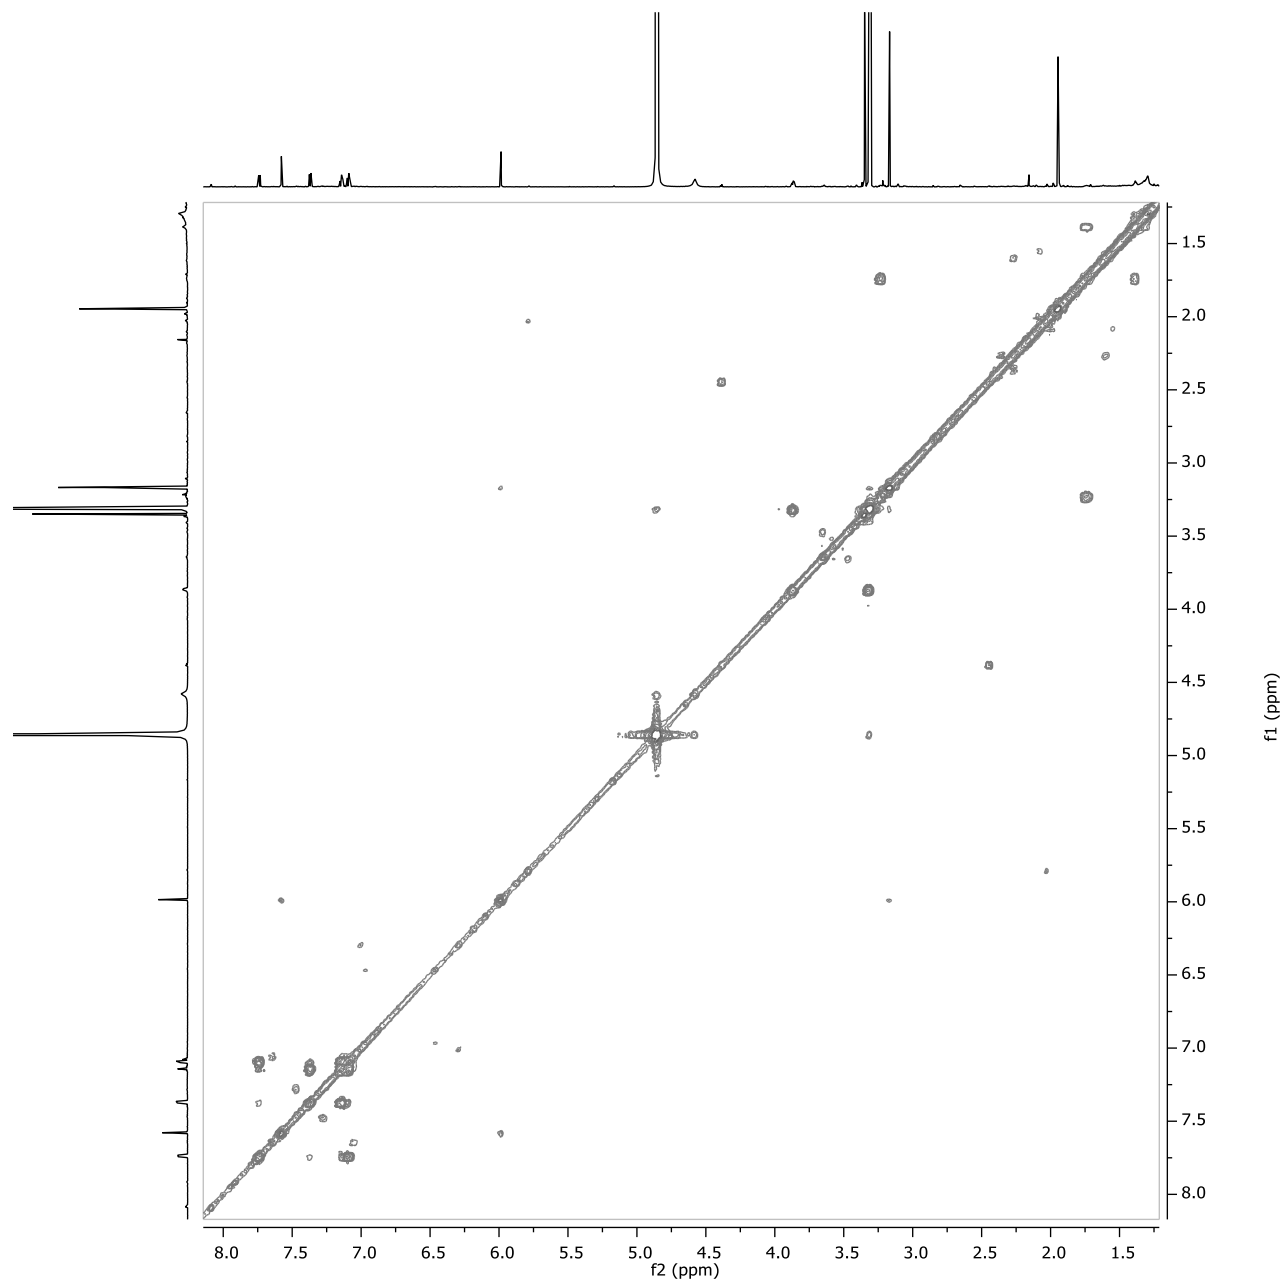

Figure S6.  $^1\text{H}$ - $^1\text{H}$  COSY spectrum of **1** in methanol- $d_4$  at 700 MHz.

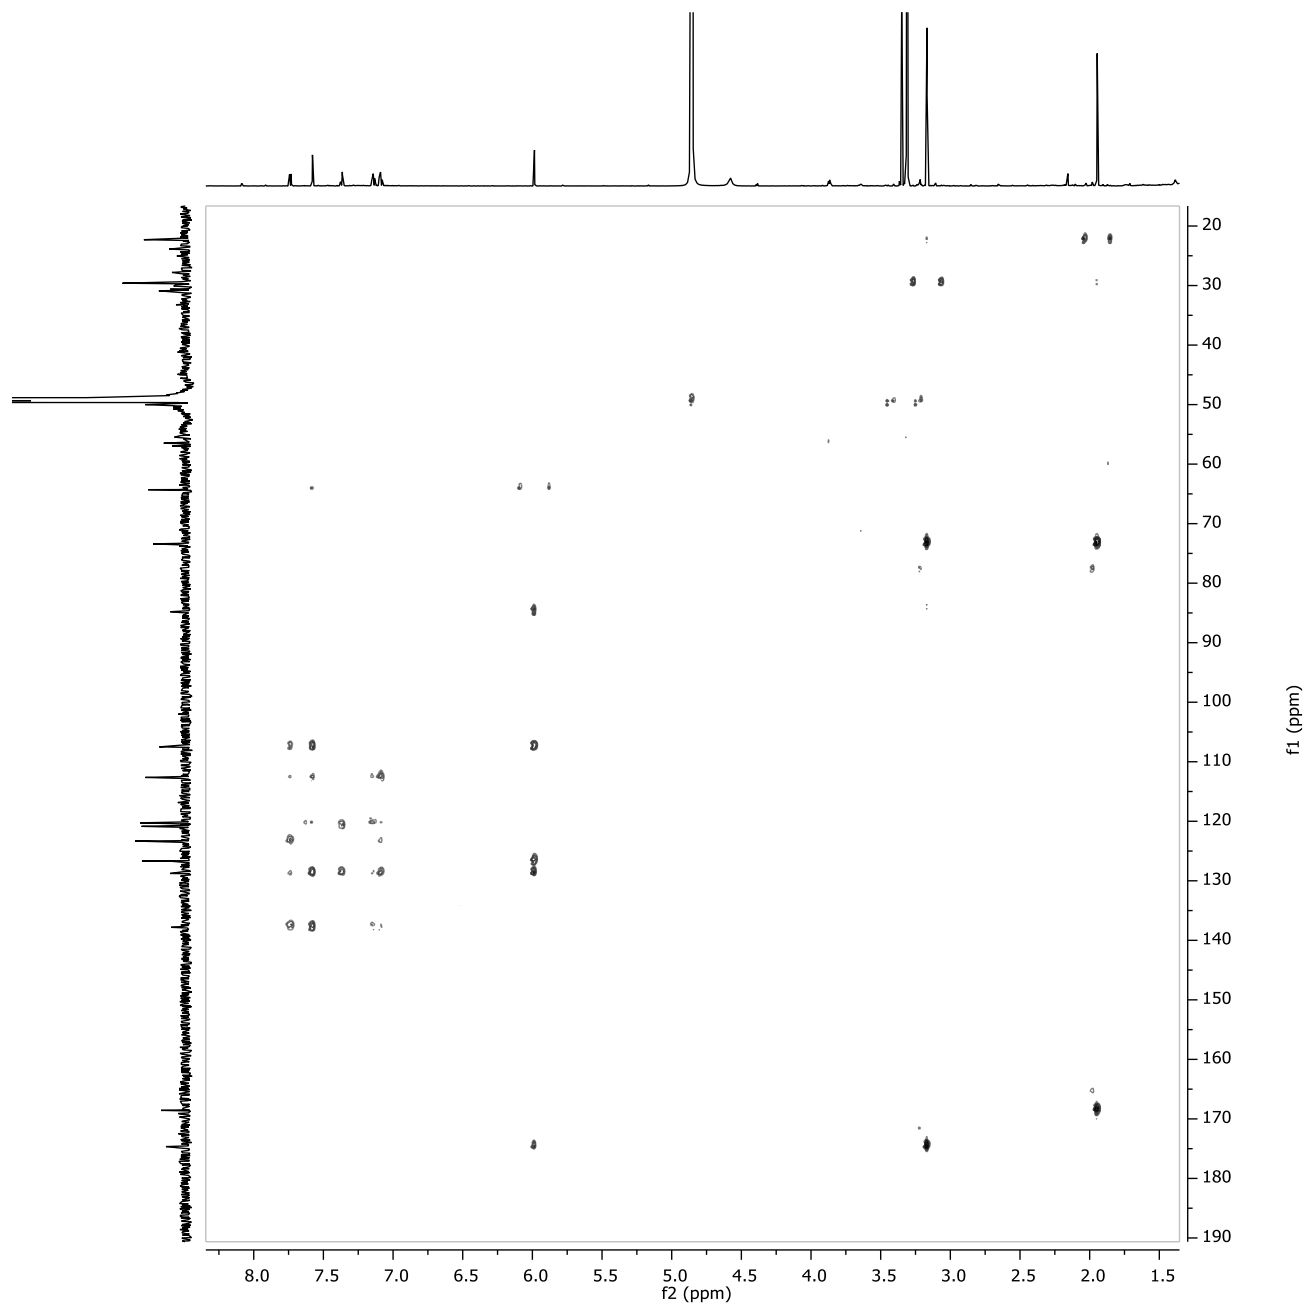

Figure S7. HMBC spectrum of **1** in methanol- $d_4$  at 700 MHz.

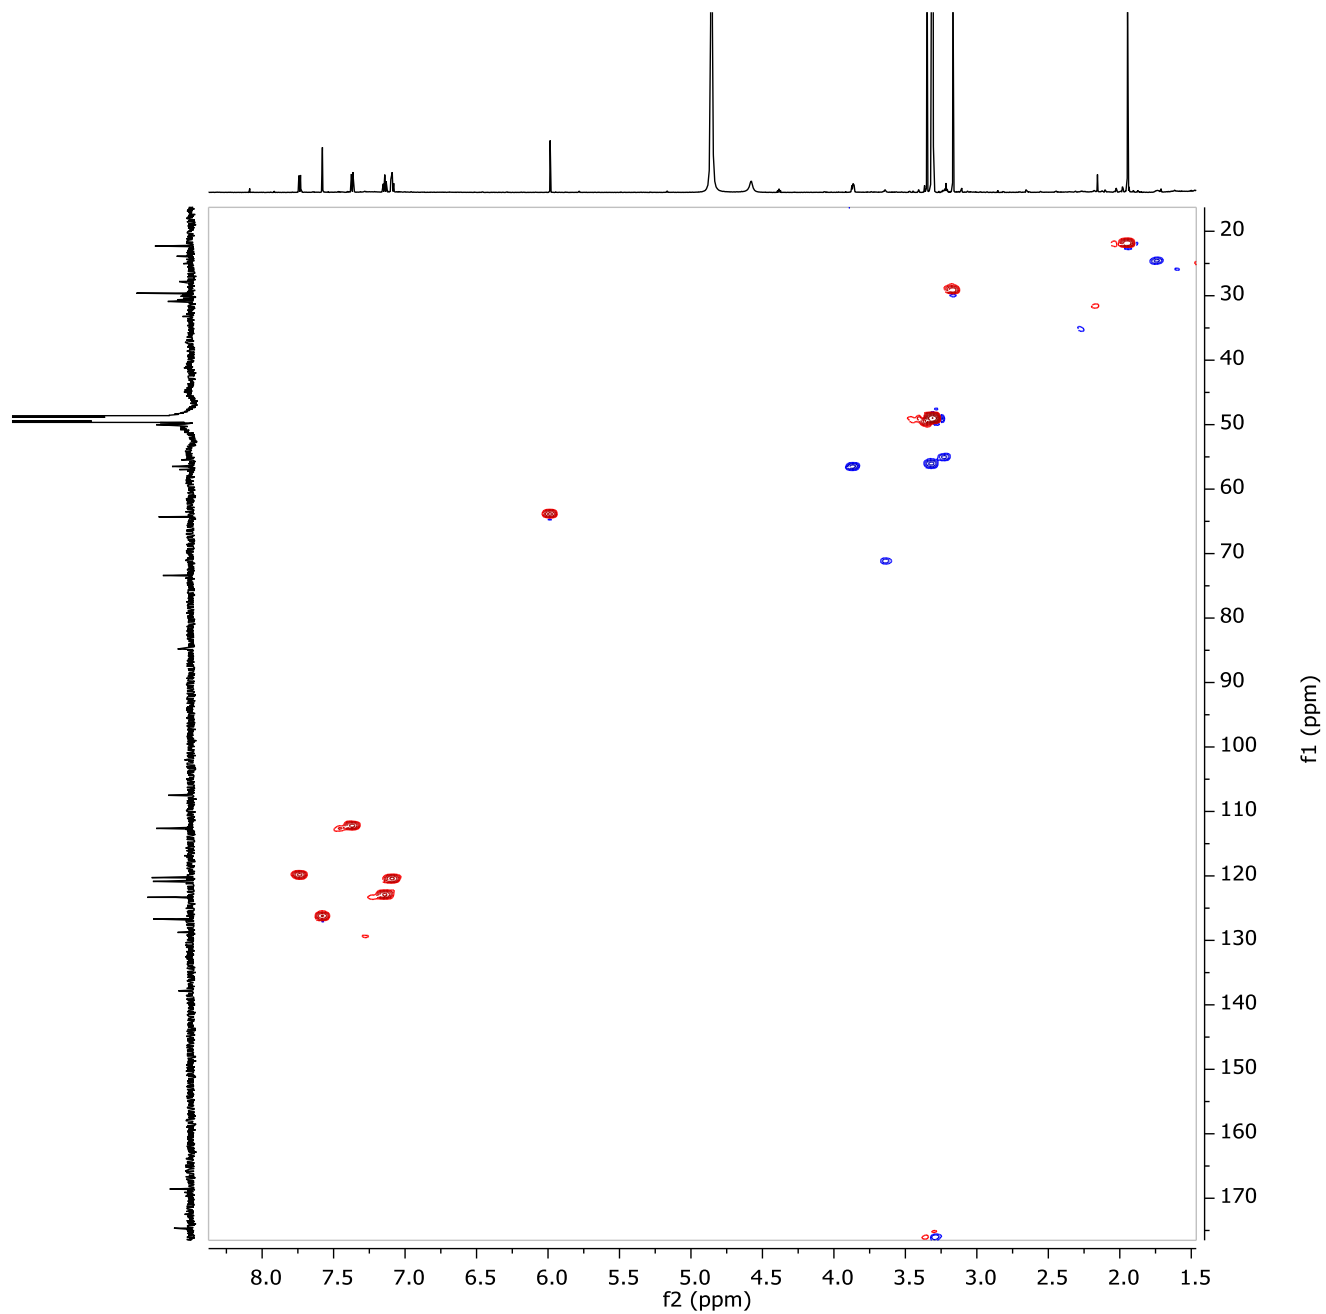

Figure S8. HSQC spectrum of **1** in methanol-*d*<sub>4</sub> at 700 MHz.

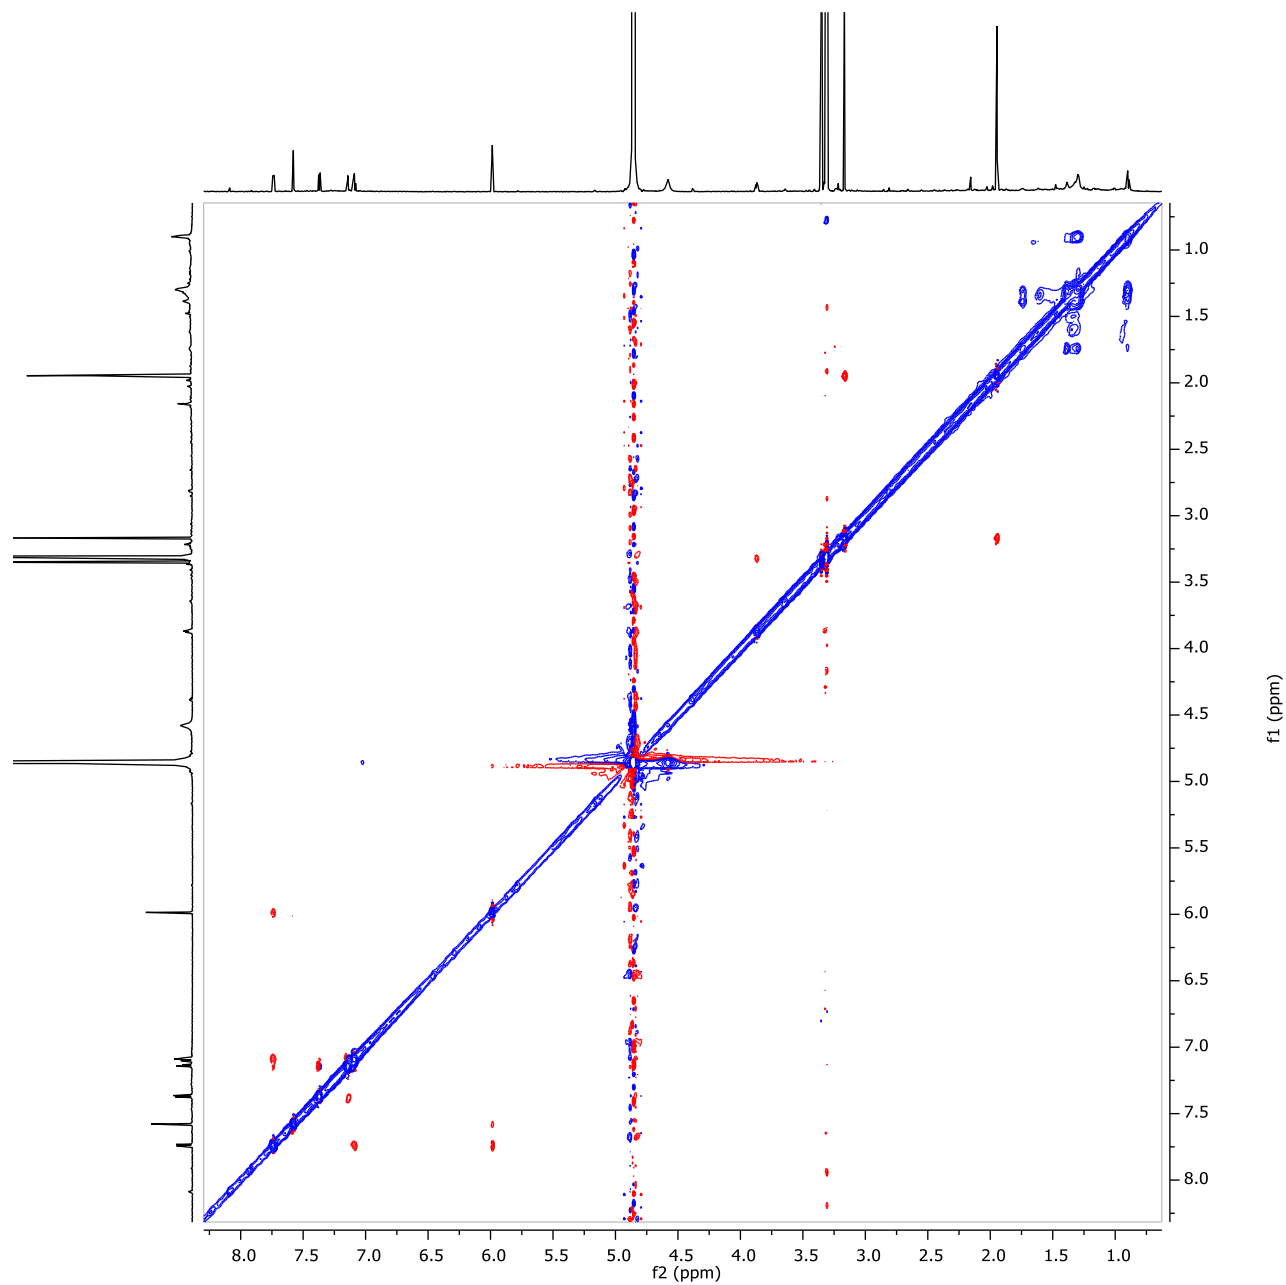

Figure S9. ROESY spectrum of **1** in methanol- $d_4$  at 700 MHz.

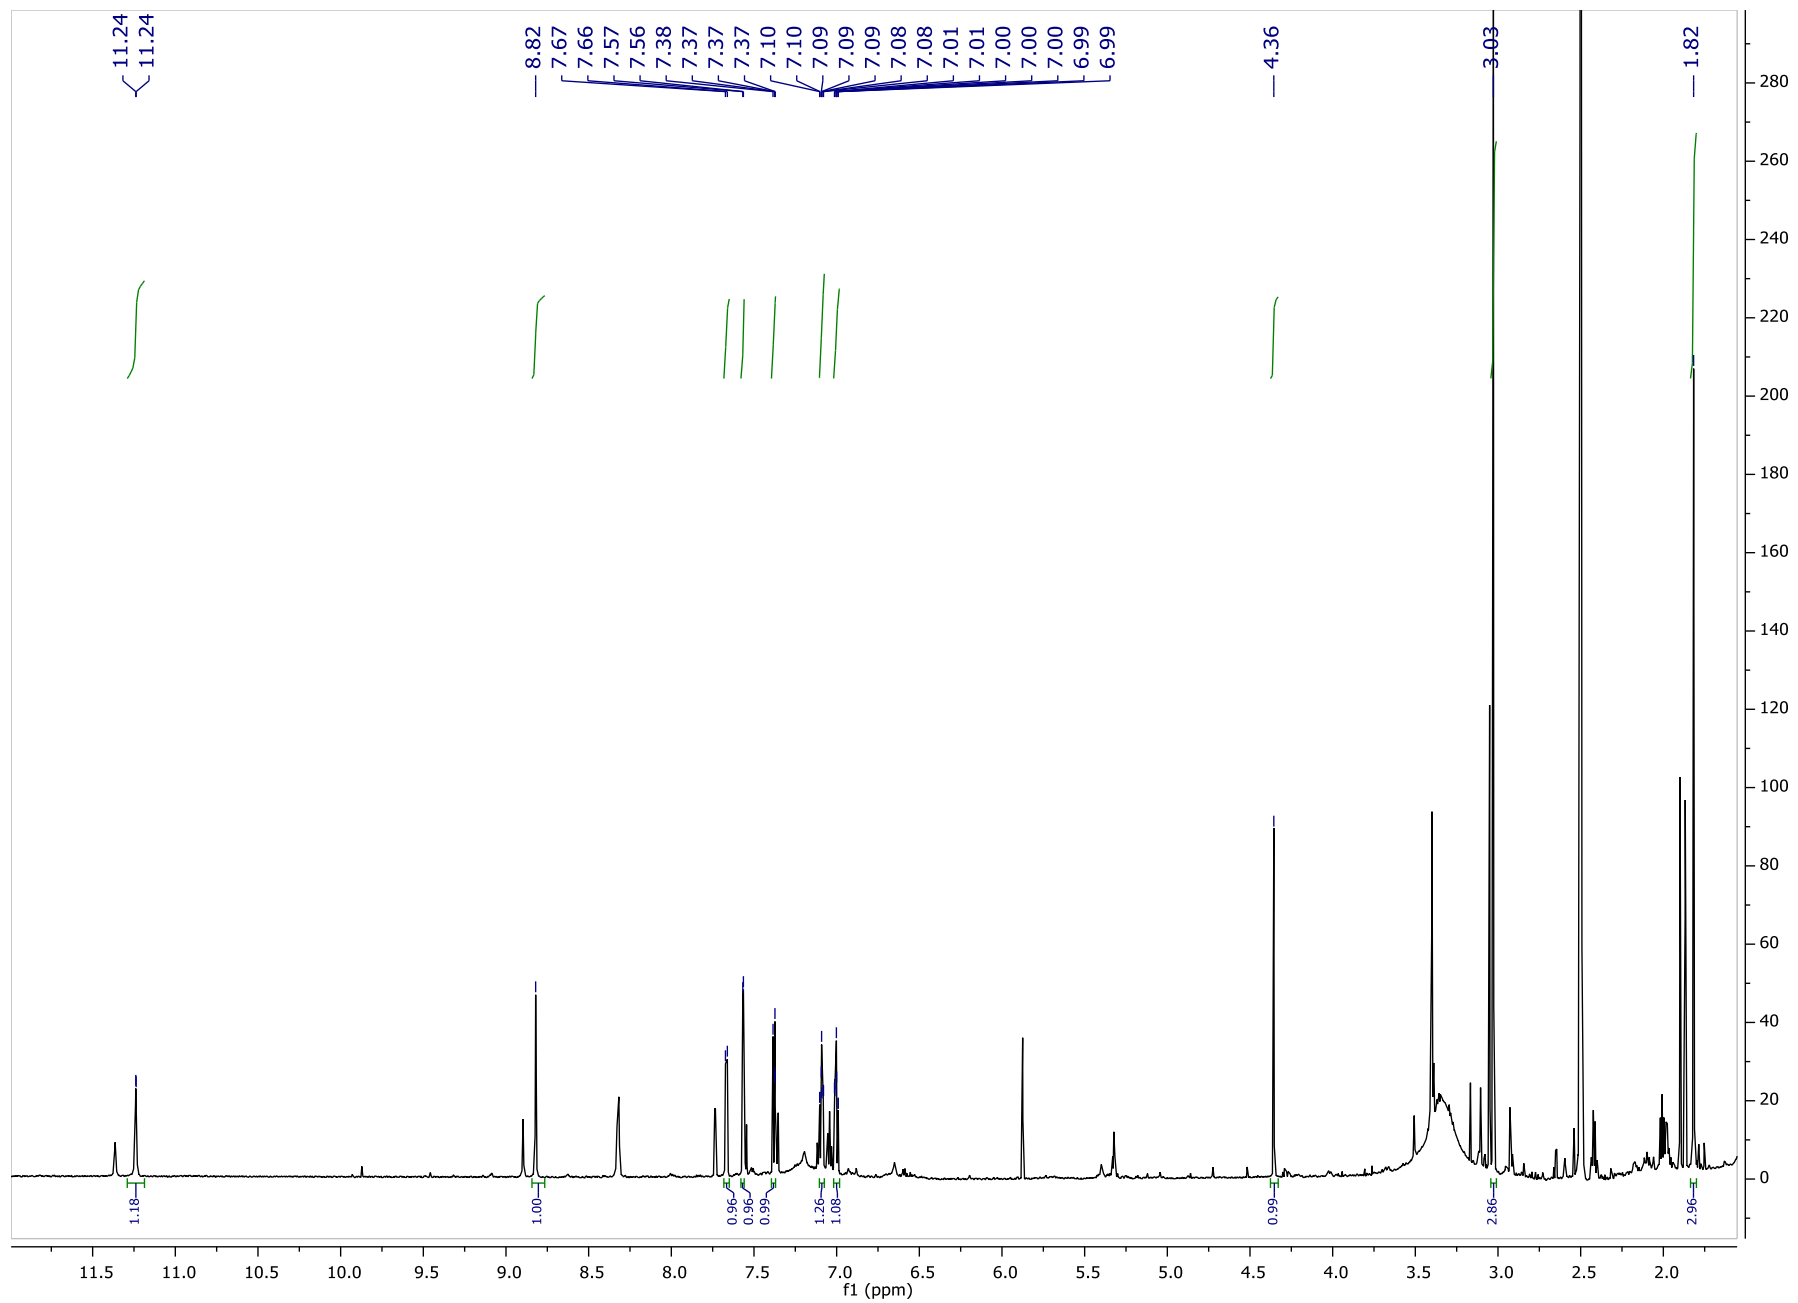

Figure S10.  $^1\text{H}$  NMR spectrum of **1** in  $\text{DMSO-}d_6$  at 700 MHz.

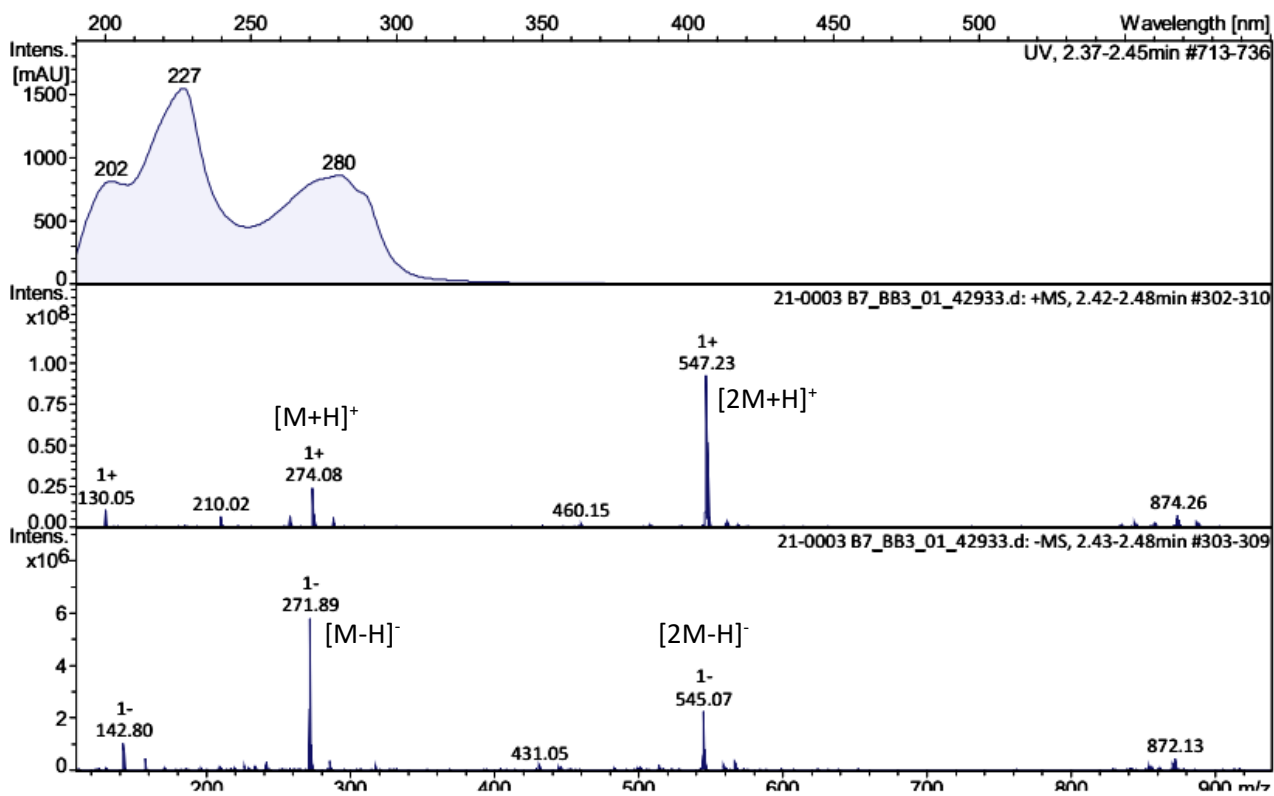

Figure S11. LRESIMS of 2.

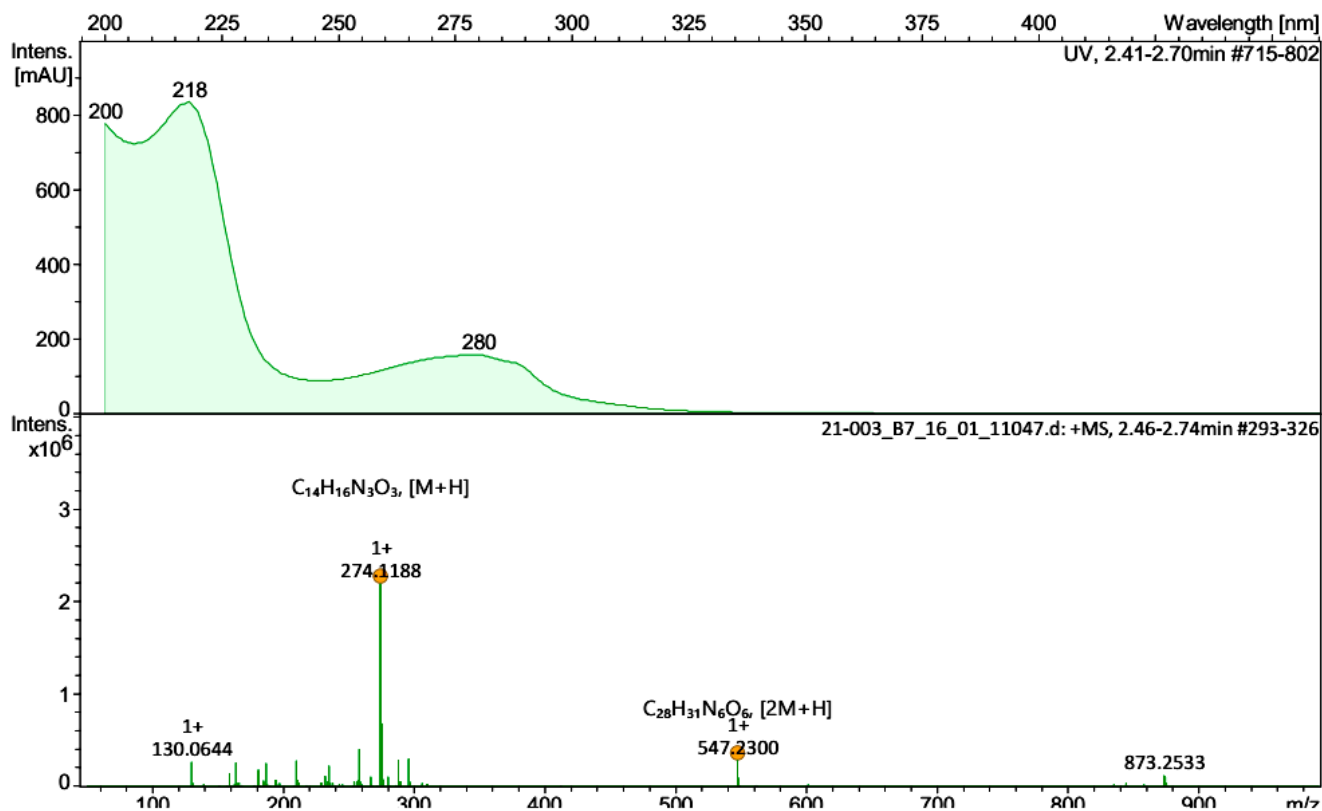

Figure S12. HRESIMS of 2.

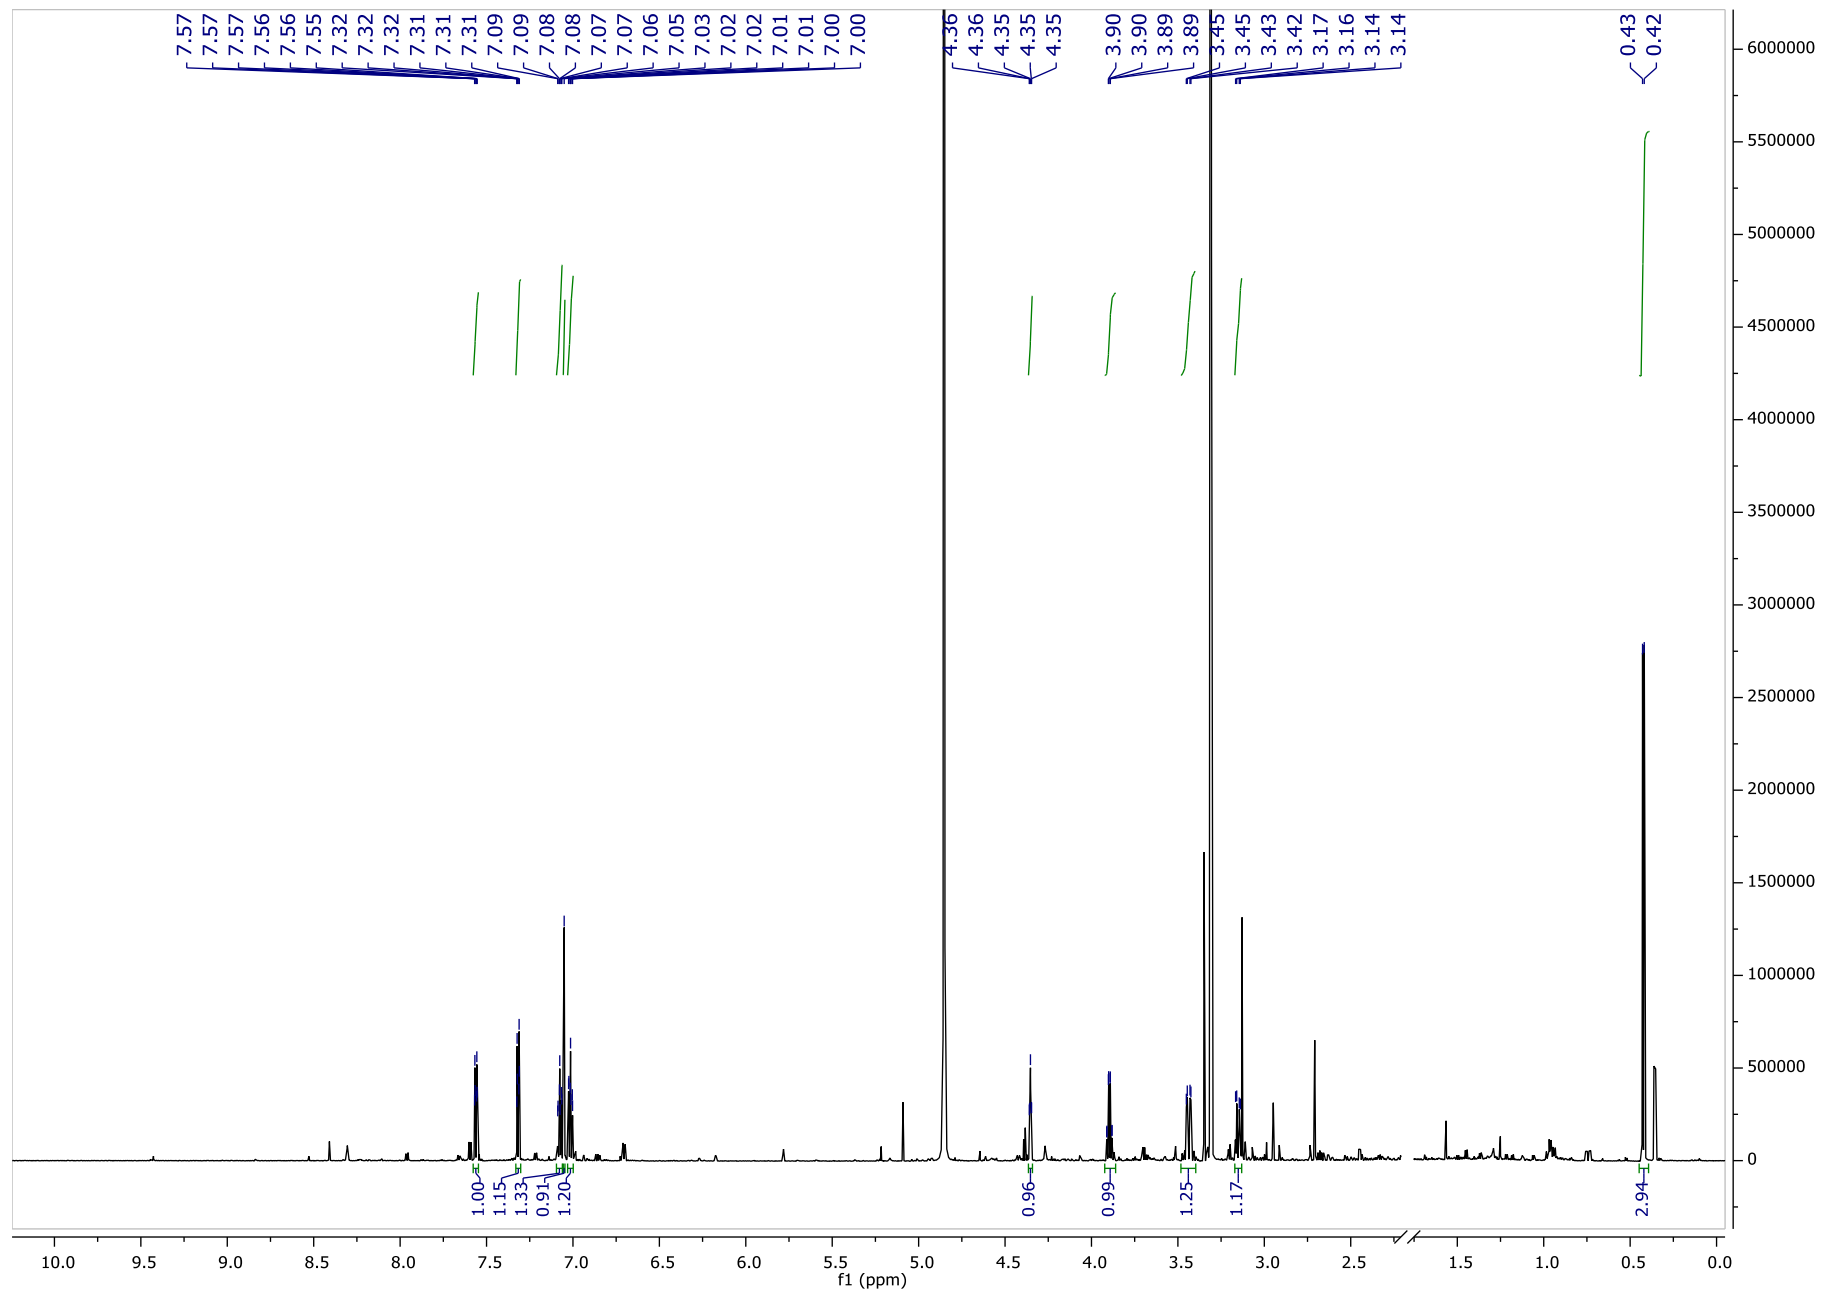

Figure S13.  $^1\text{H}$  NMR spectrum of **2** in methanol- $d_4$  at 700 MHz.



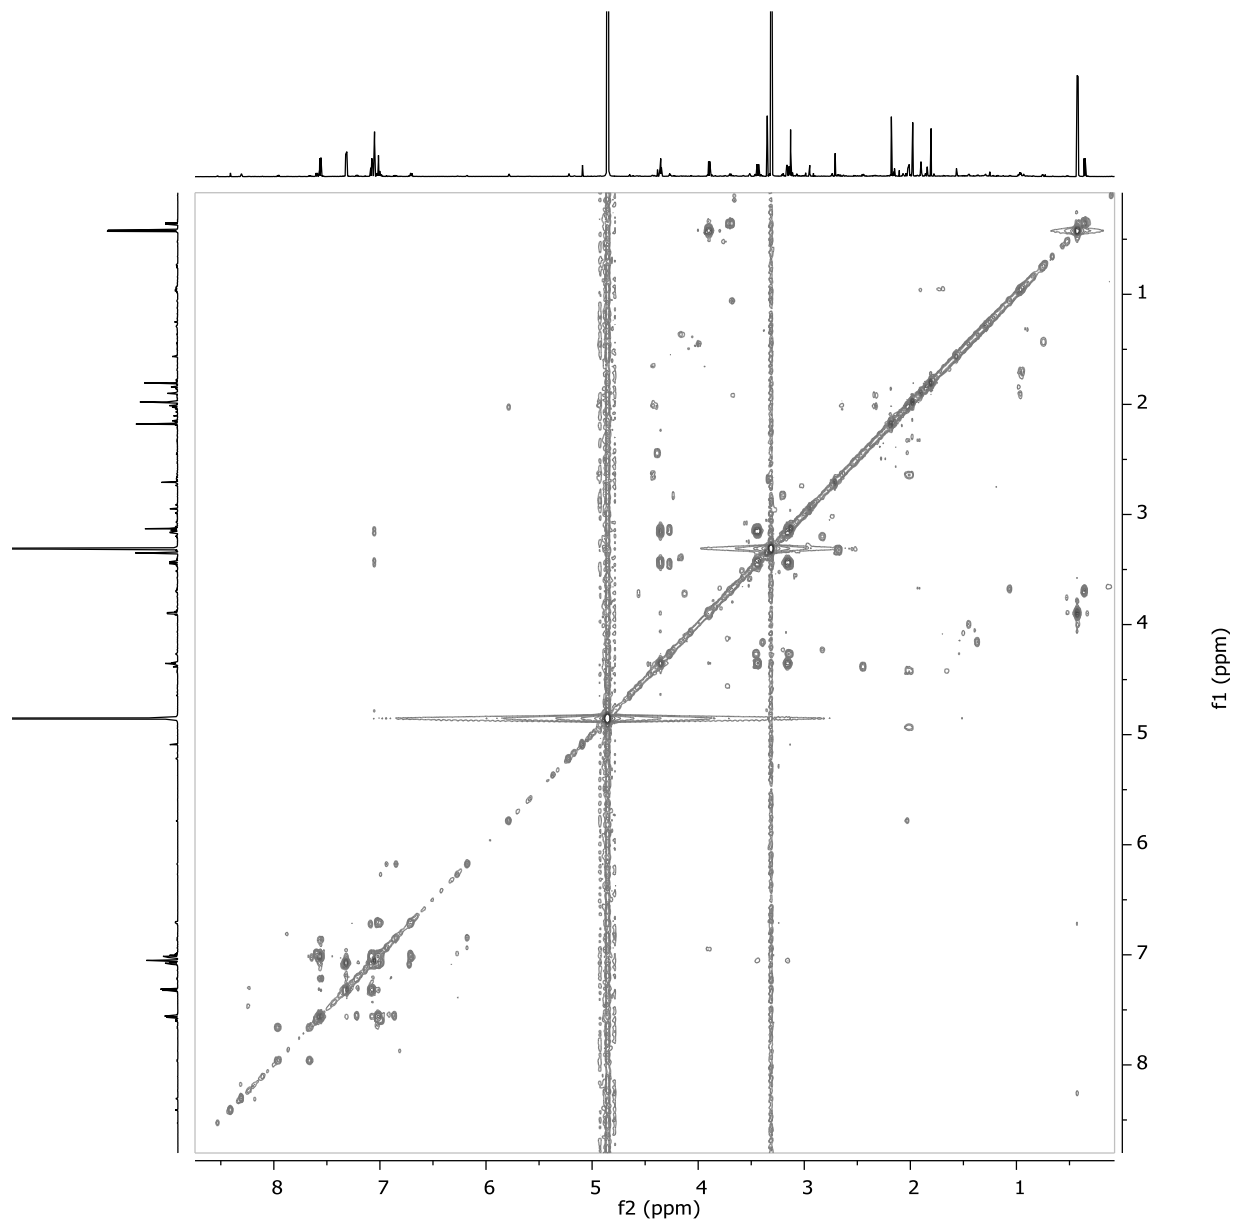

Figure S14.  $^1\text{H}$ - $^1\text{H}$  COSY spectrum of **2** in methanol- $d_4$  at 700 MHz.

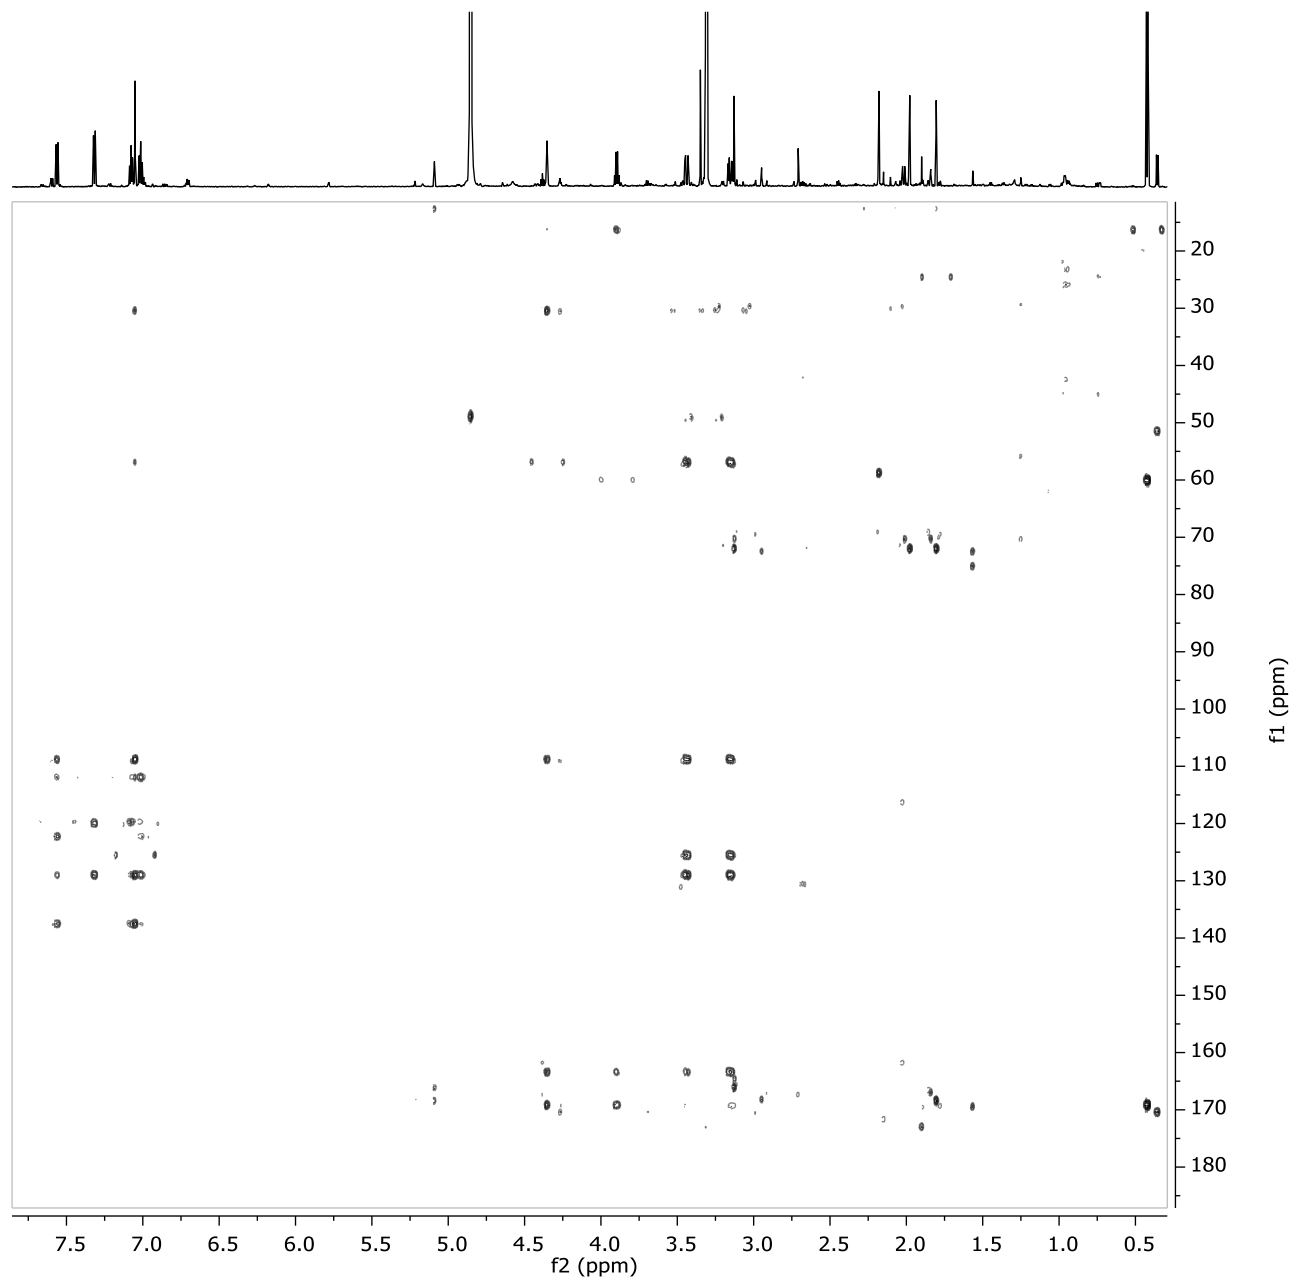

Figure S15. HMBC spectrum of **2** in methanol- $d_4$  at 700 MHz.

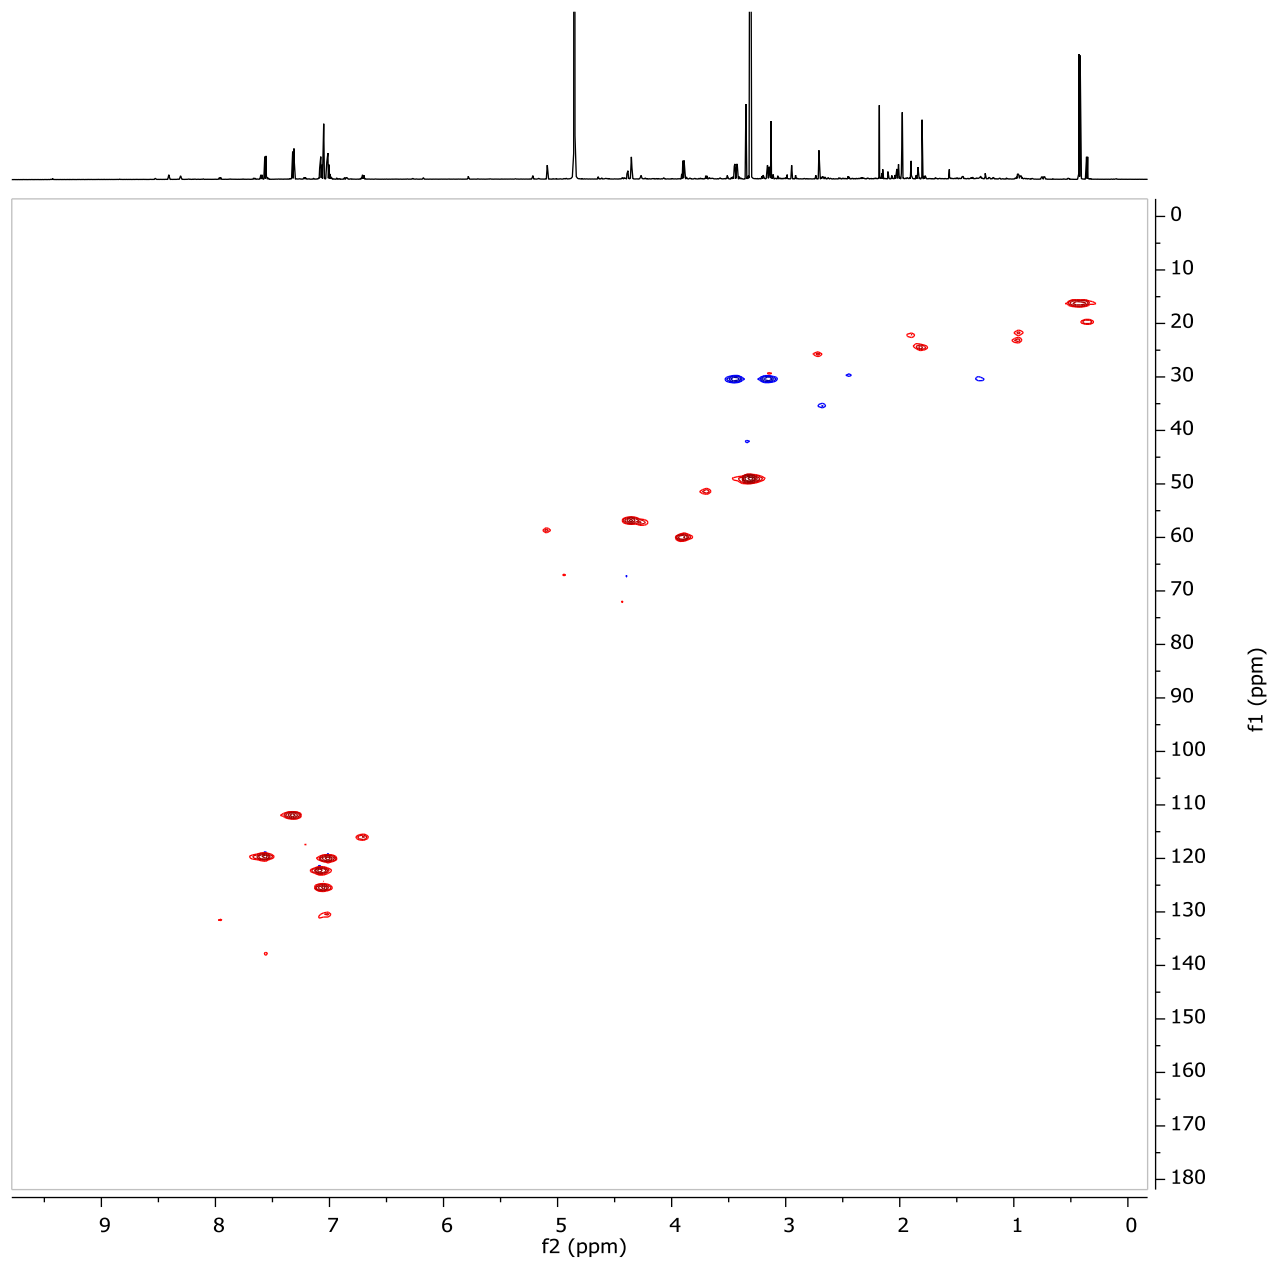

Figure S16. HSQC spectrum of **2** in methanol- $d_4$  at 700 MHz.

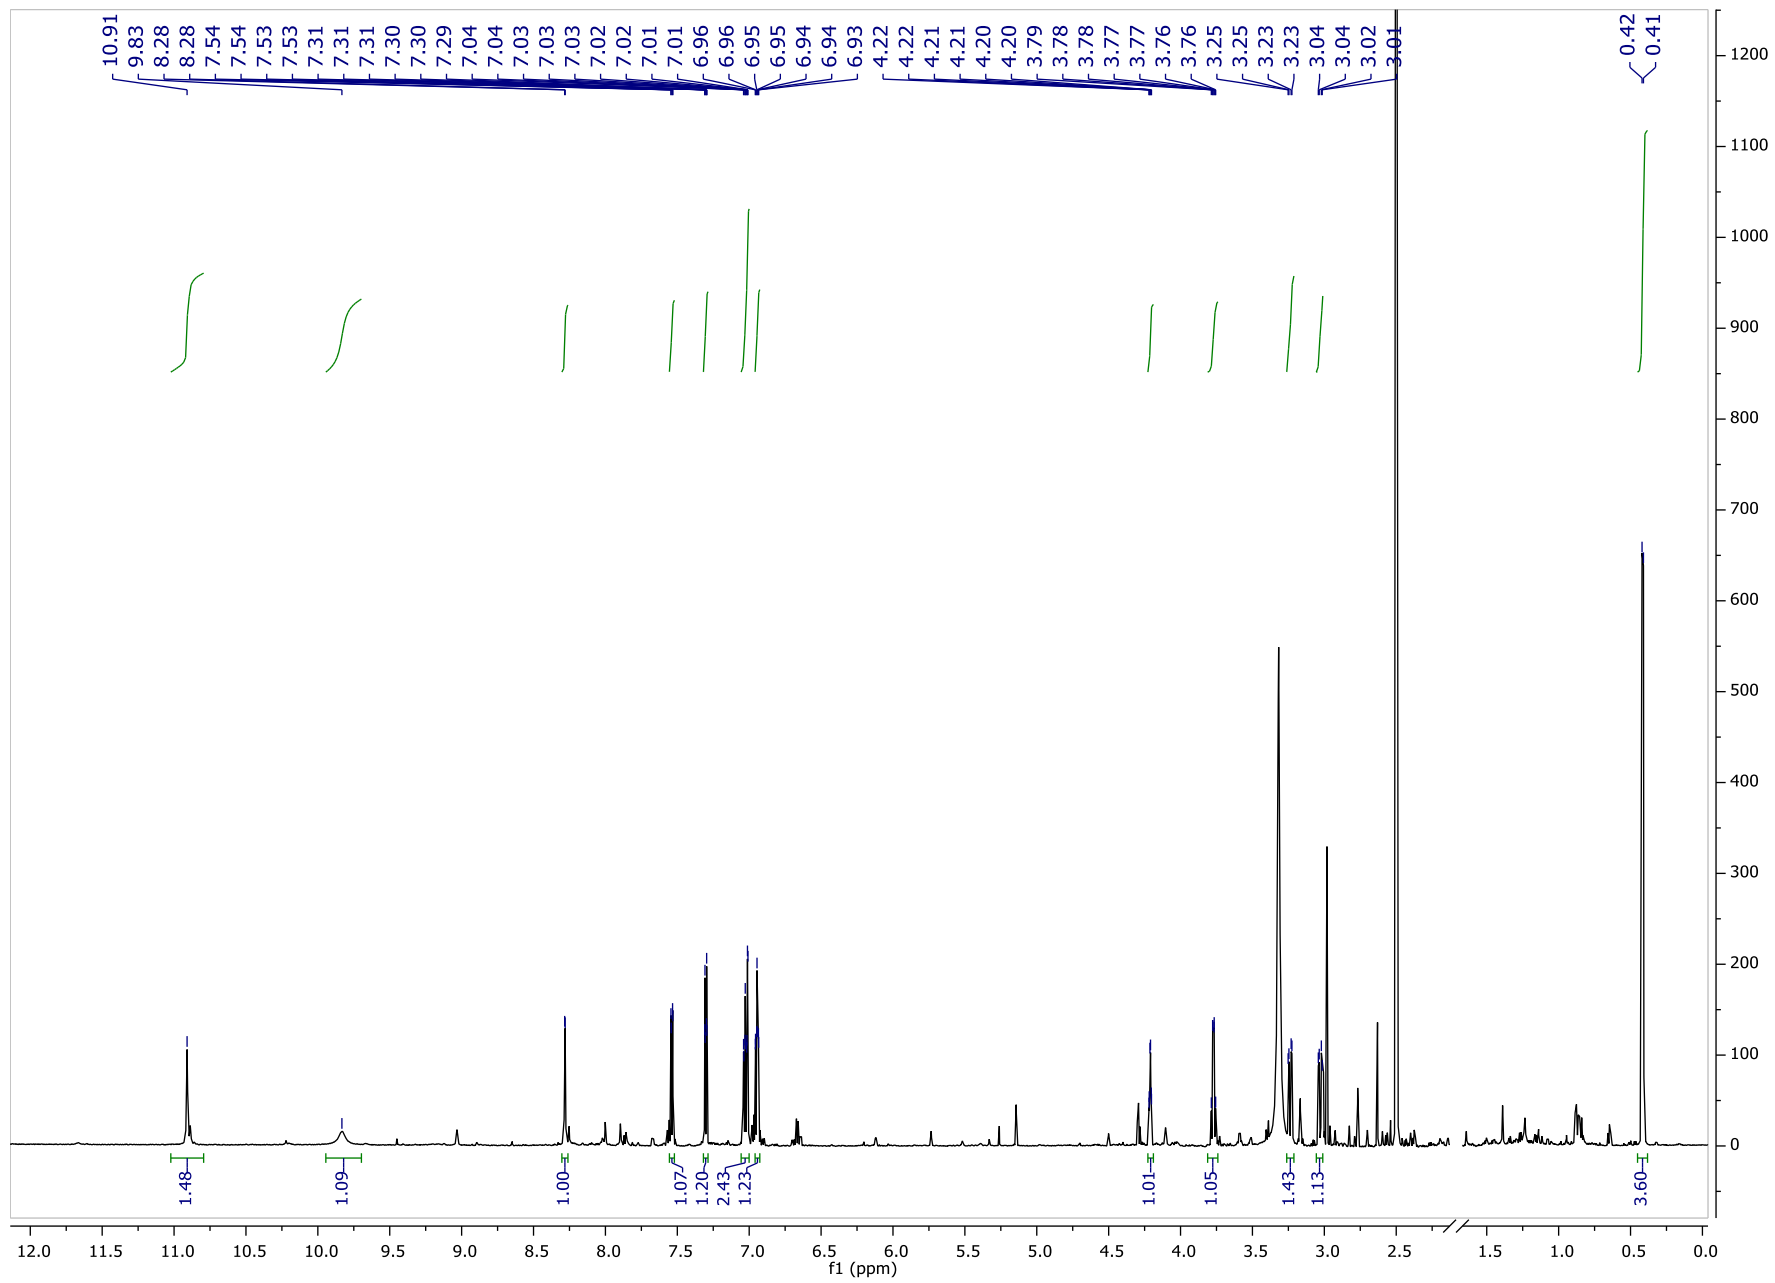

Figure S17.  $^1\text{H}$  NMR spectrum of **2** in  $\text{DMSO-}d_6$  at 700 MHz.

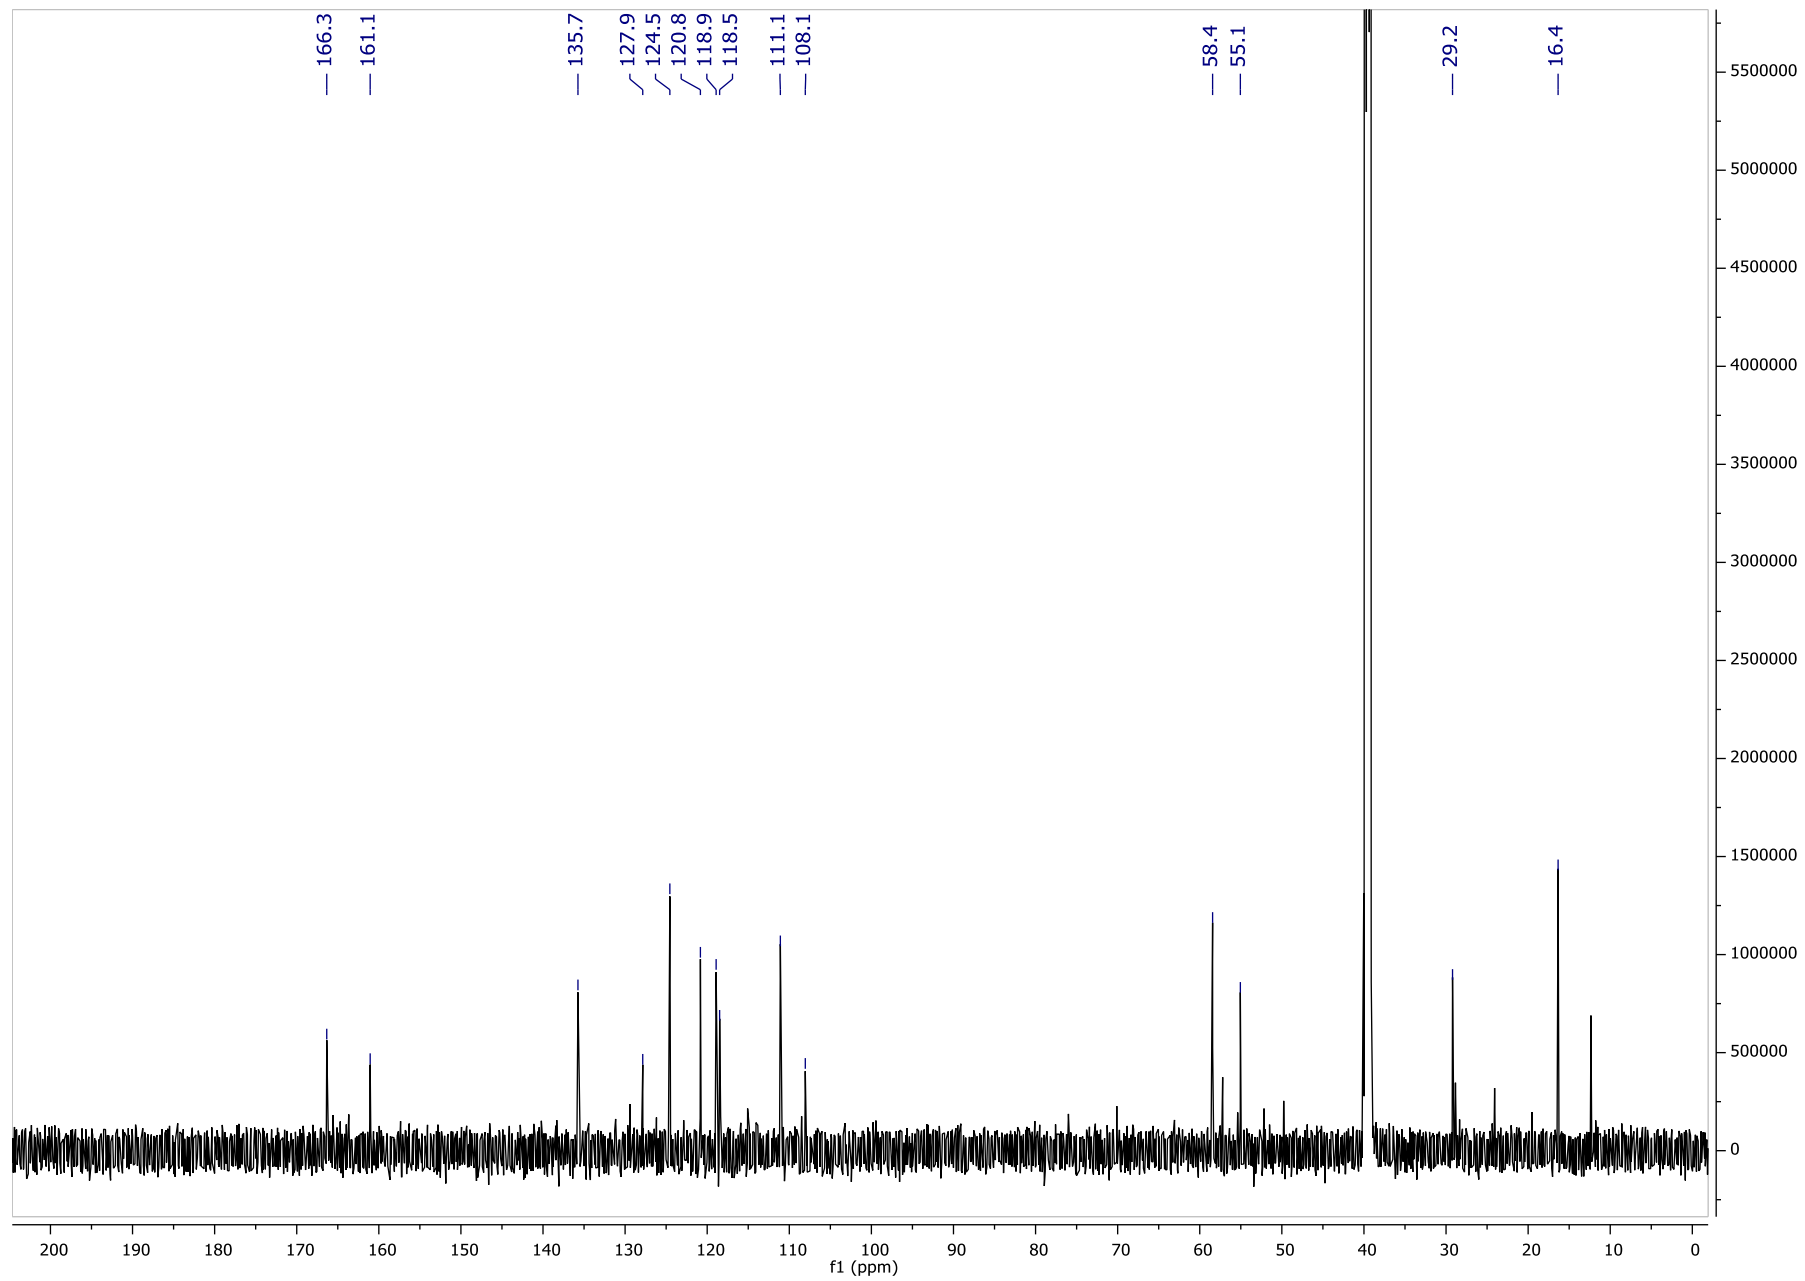

Figure S18.  $^{13}\text{C}$  NMR spectrum of **2** in  $\text{DMSO-}d_6$  at 175 MHz.

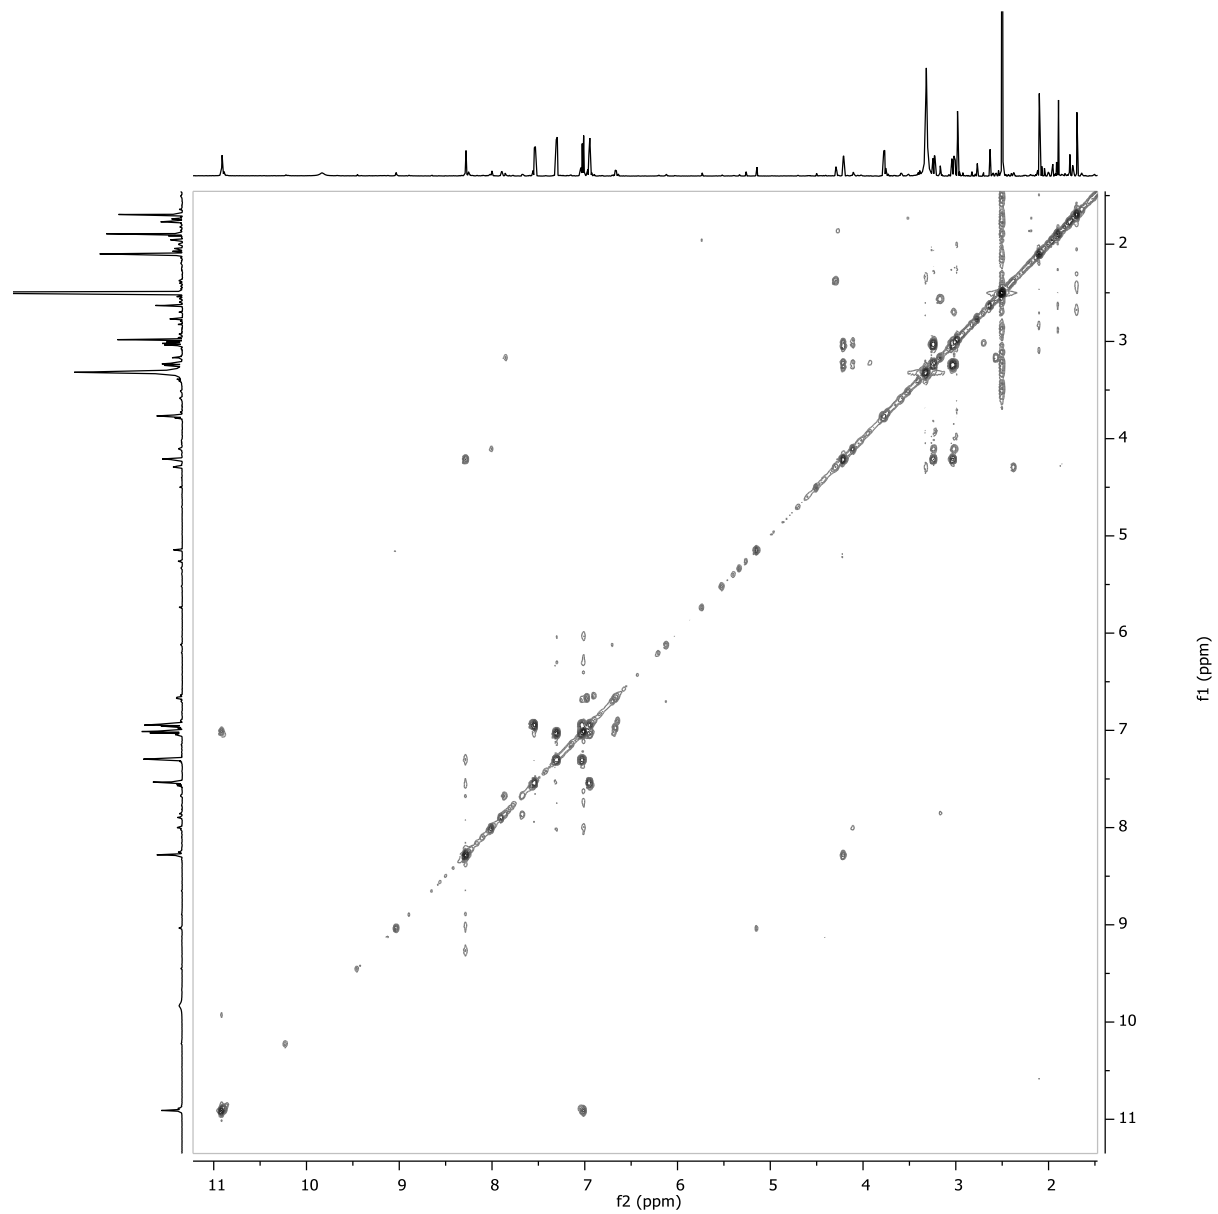

Figure S19.  $^1\text{H}$ - $^1\text{H}$  COSY spectrum of **2** in  $\text{DMSO-}d_6$  at 700 MHz.

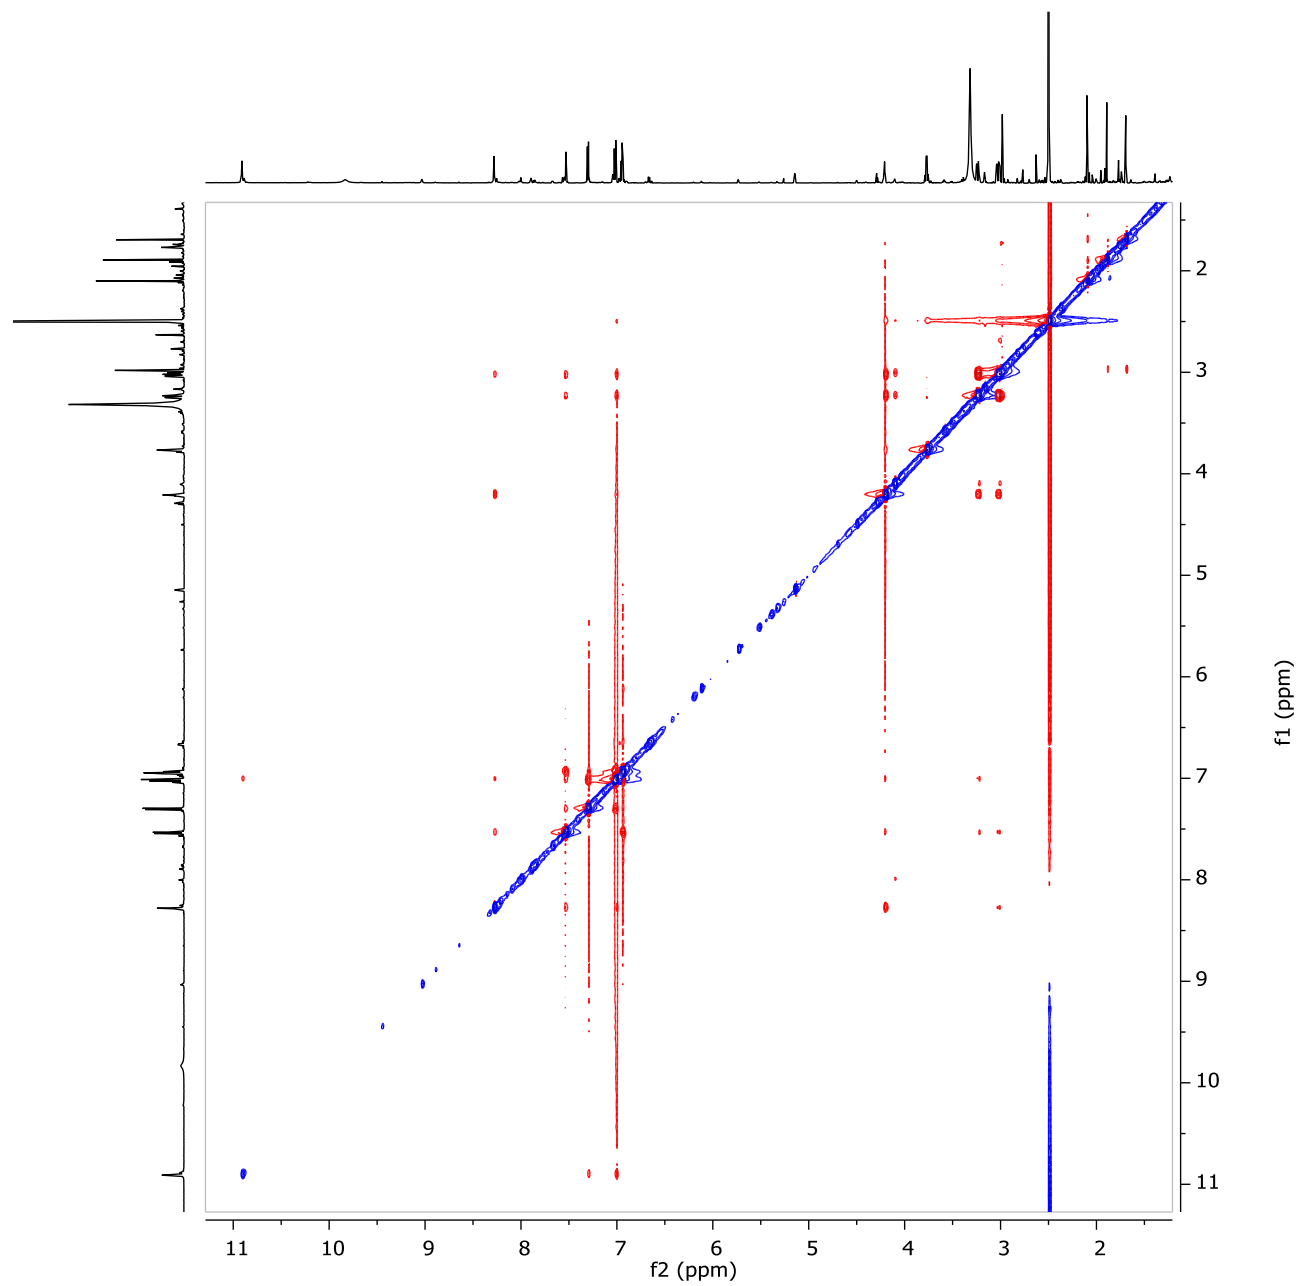

Figure S20. ROESY spectrum of **2** in DMSO-*d*<sub>6</sub> at 700 MHz.

# Generic Display Report

## Analysis Info

Analysis Name S:\DATA\AmaZon\gkh22\_GickyKhruengsai\b7f2\_BE8\_01\_43961.d  
Method 43961.m  
Sample Name b7f2  
Comment

Acquisition Date 20.12.2022 23:58:33  
Operator esu  
Instrument amaZon speed

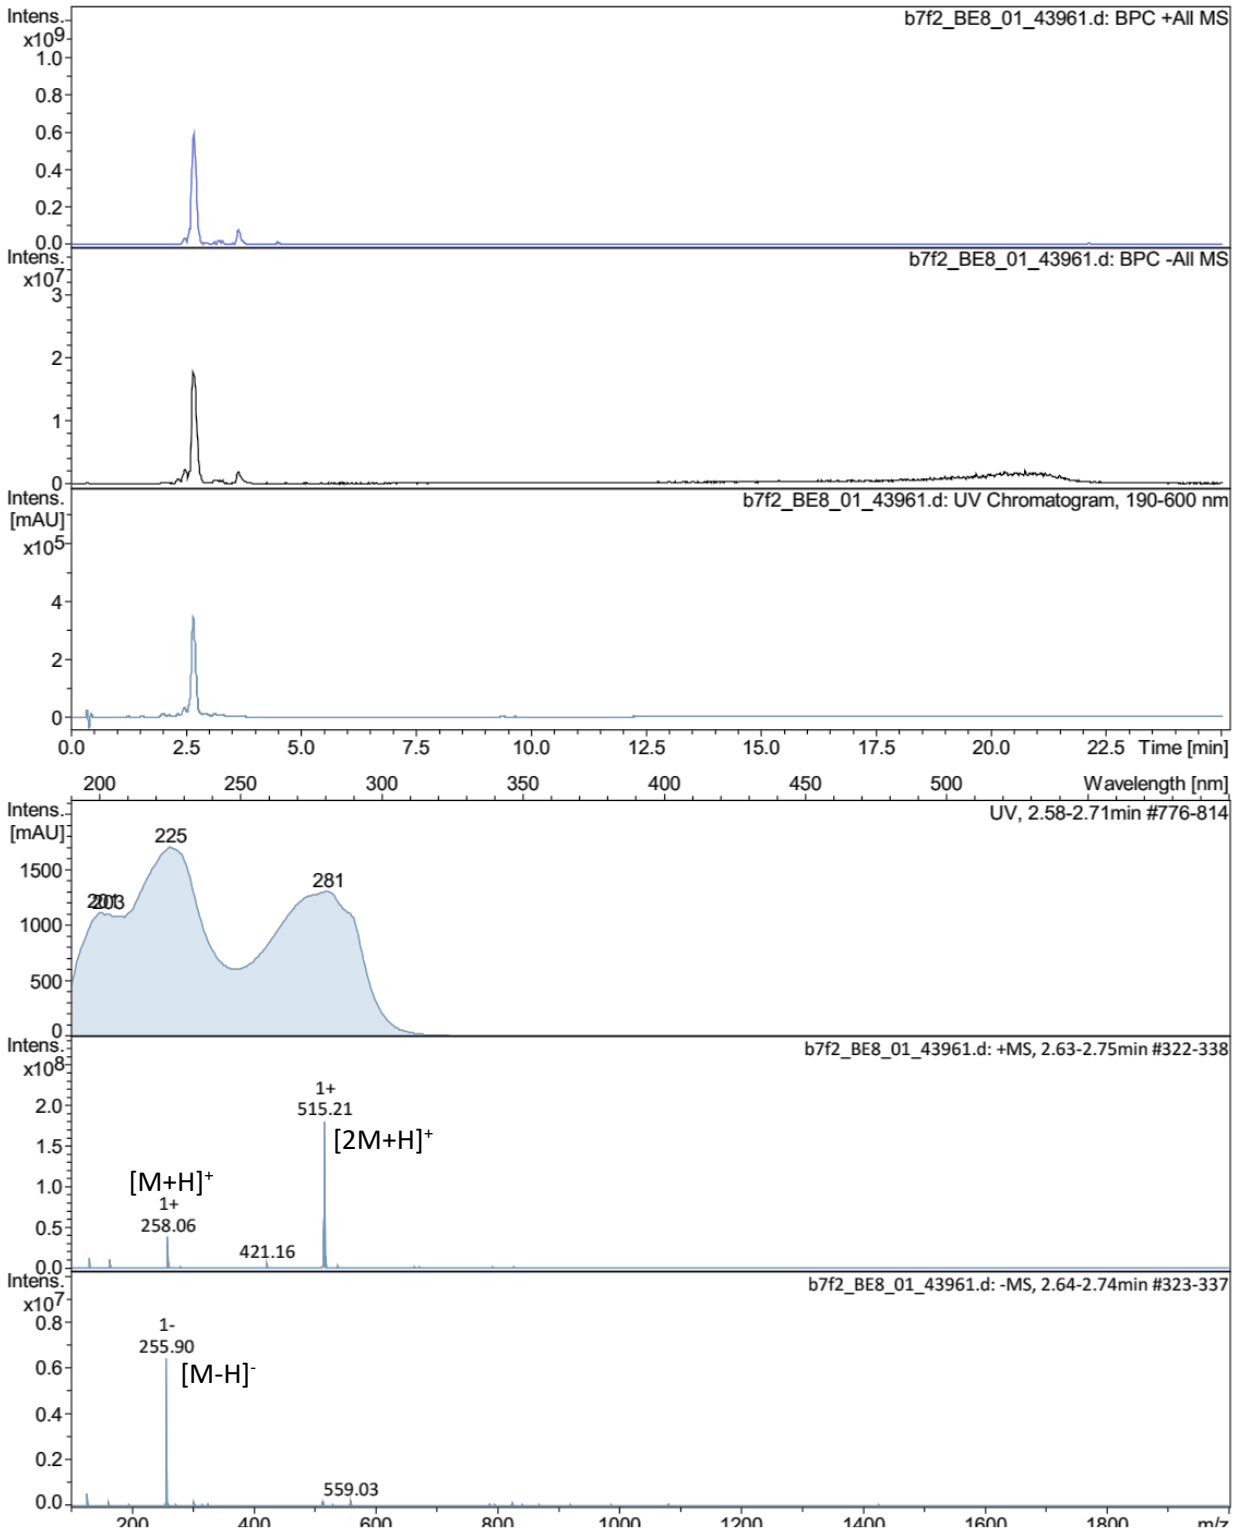

Figure S21. LRESIMS of 3.



# Generic Display Report

## Analysis Info

Analysis Name S:\DATA\Maxis\sel22\_SherifElsayed\22\_11\21-003\_B7\_16\_01\_11047.d  
Method pos\_säure\_10000\_screening\_ms\_100\_2500\_line.m  
Sample Name 21-003\_B7  
Comment Screening01  
Waters Acquity UPLC BEH C\_18 1,7um 2.1x50mm

Acquisition Date 22.11.2022 17:51:38

Operator ate06  
Instrument maxis

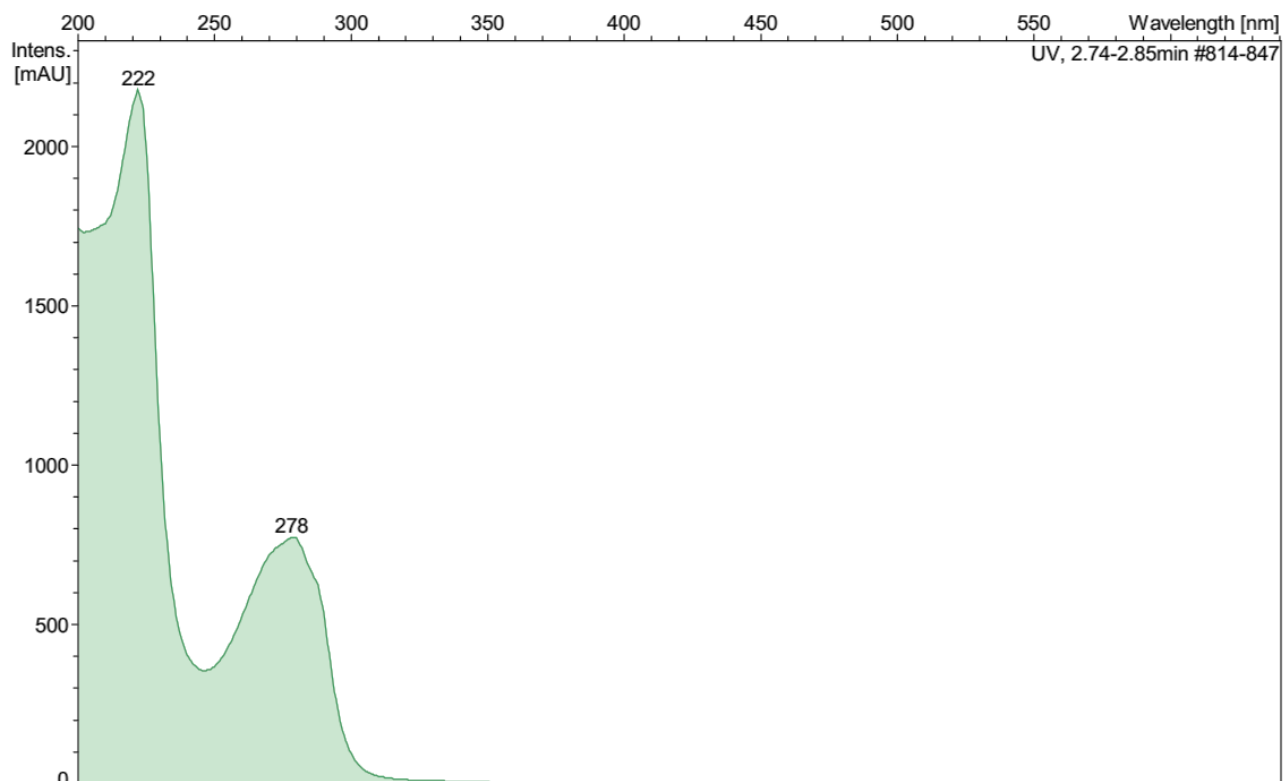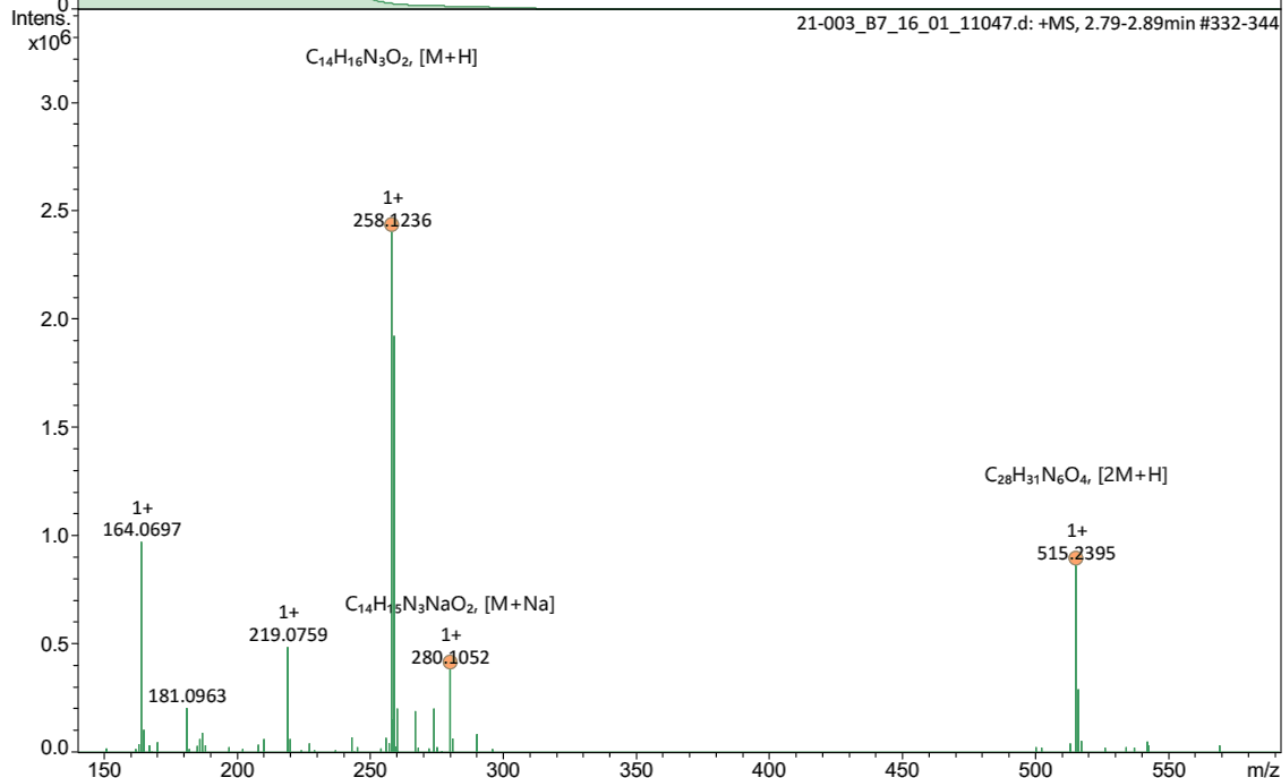

Figure S22. HRESIMS of 3.

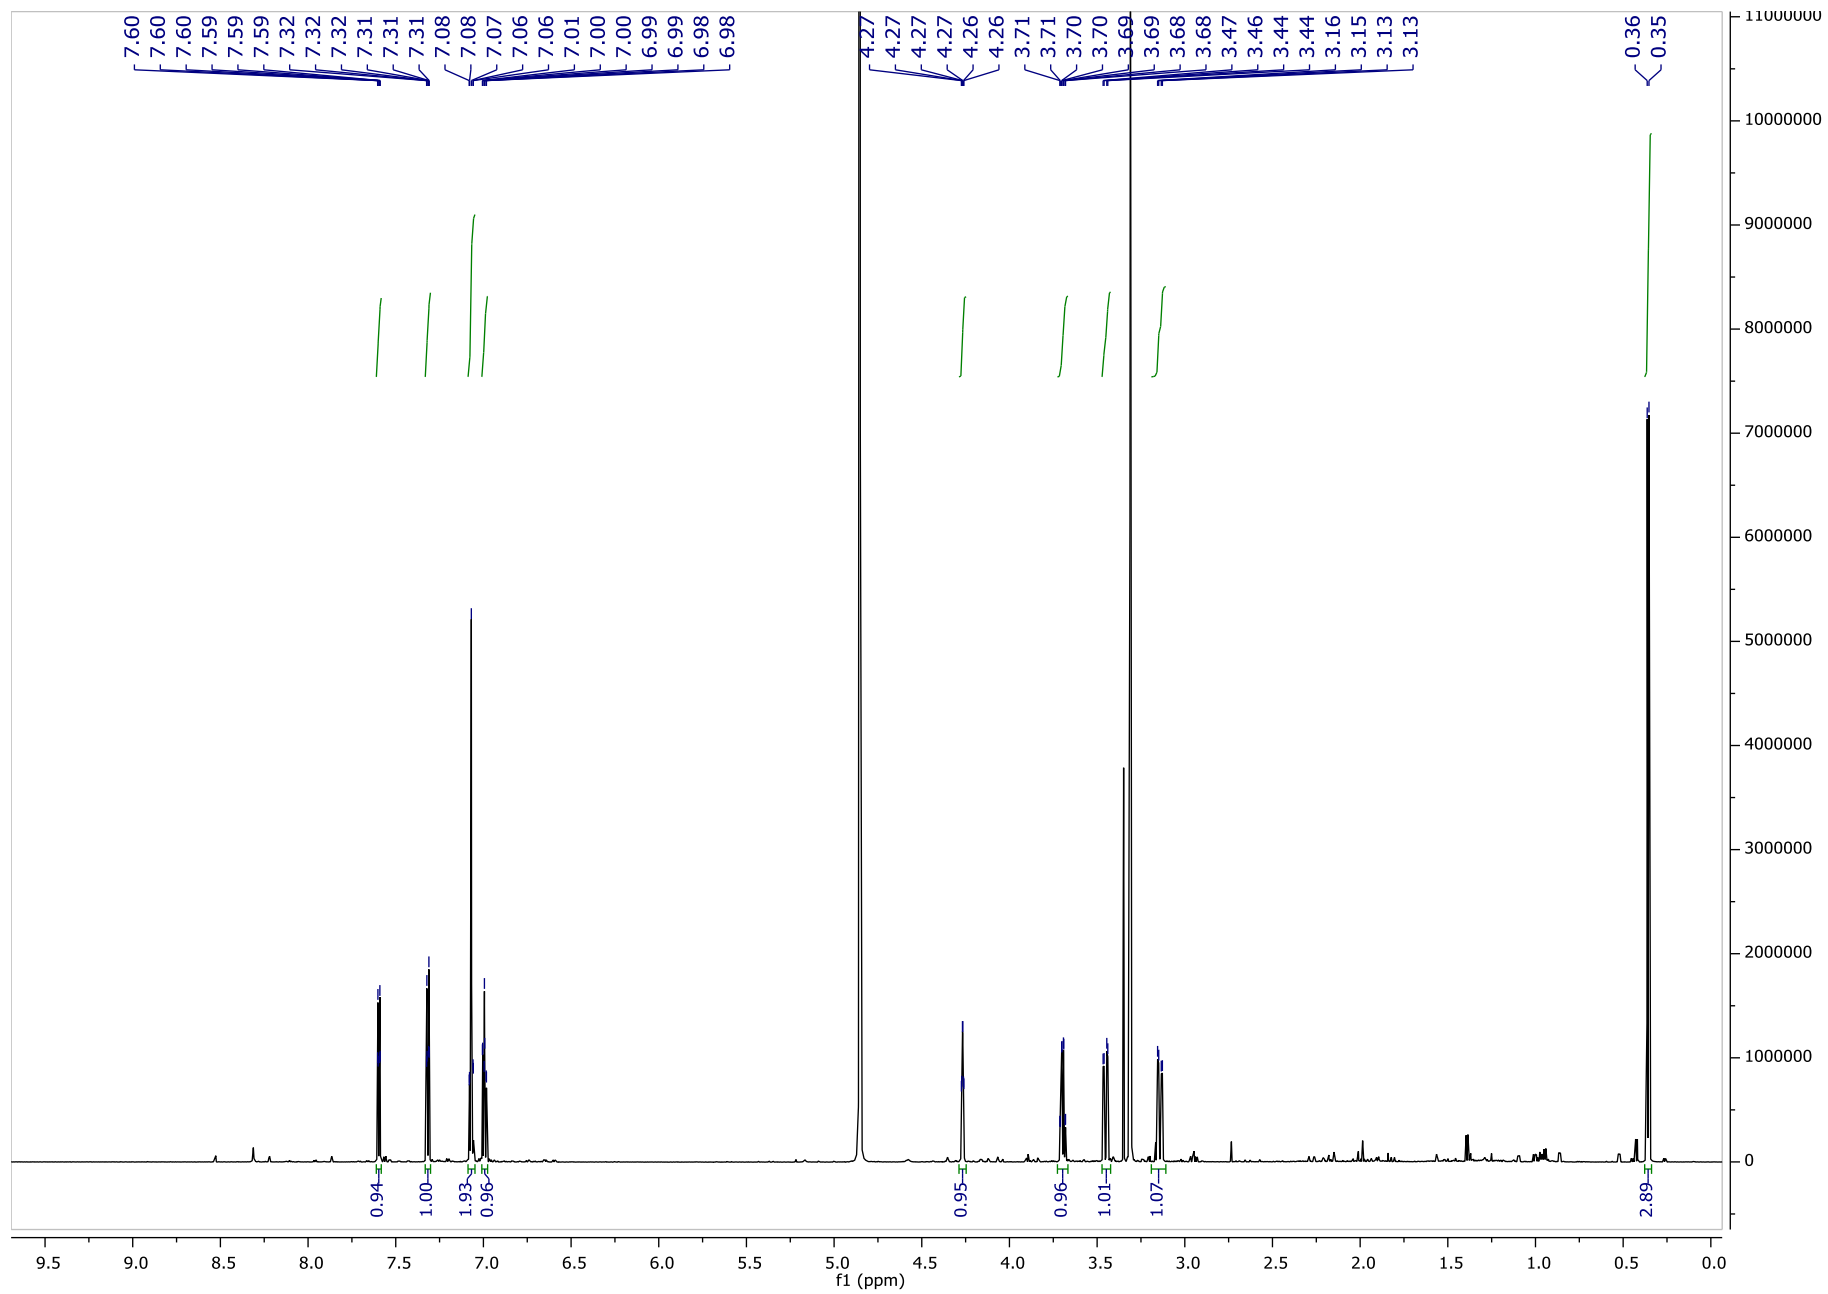

Figure S23.  $^1\text{H}$  NMR spectrum of **3** in methanol- $d_4$  at 700 MHz.

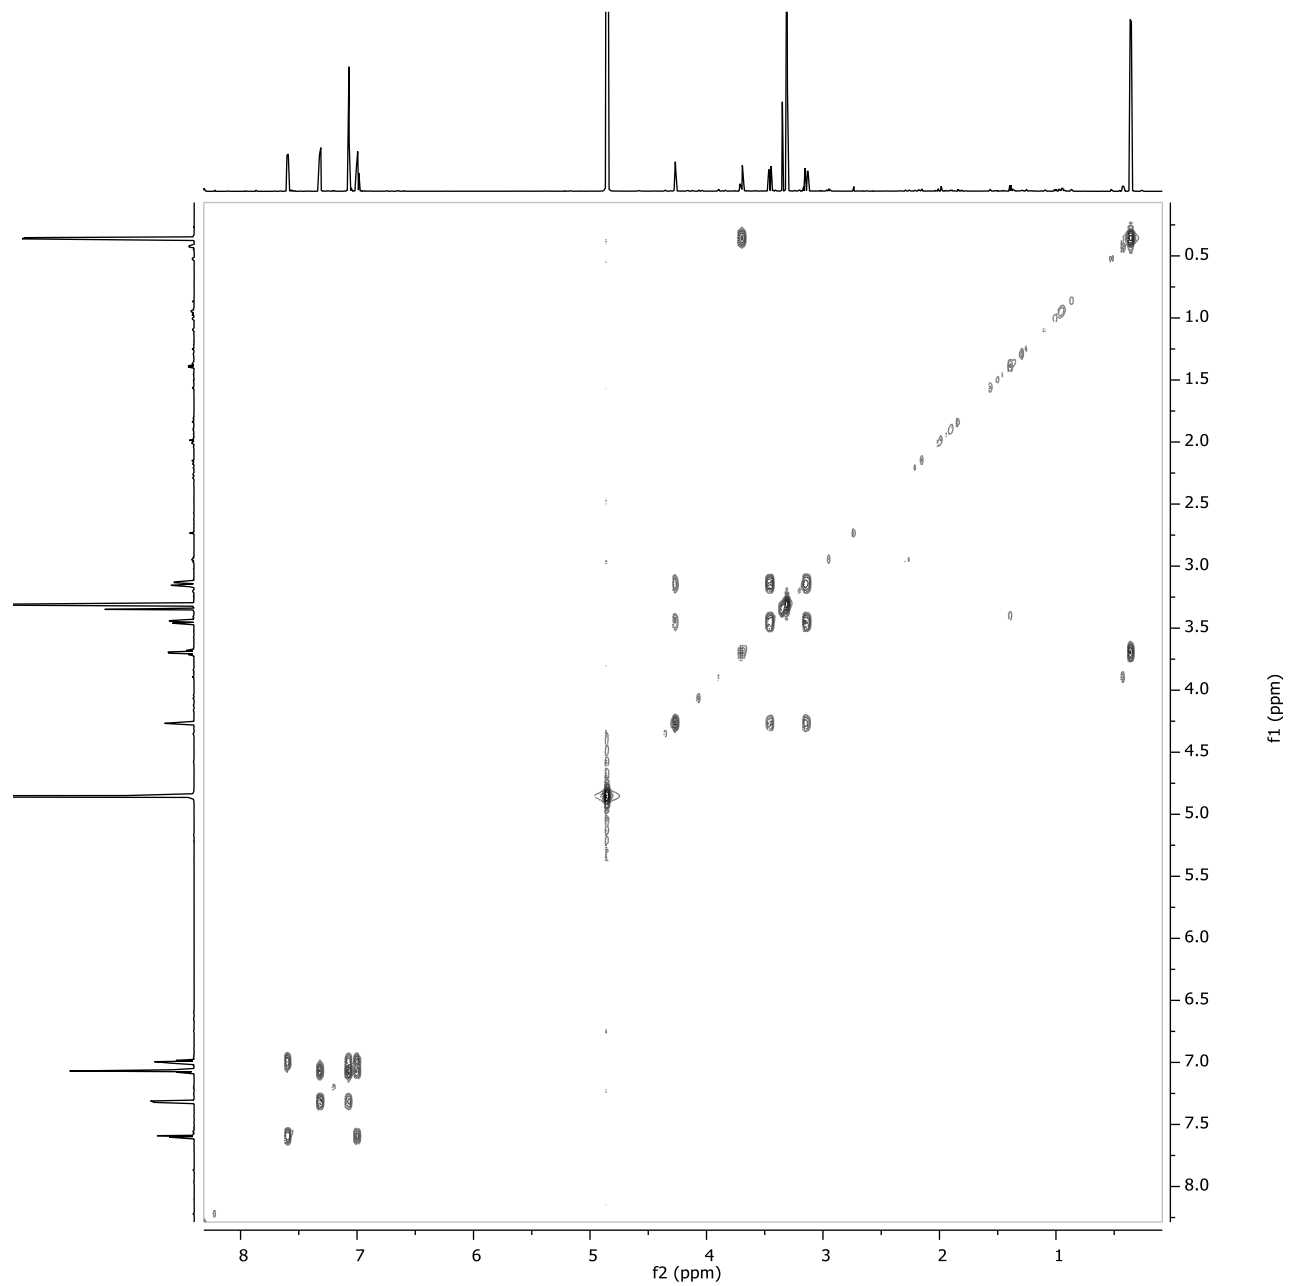

Figure S24.  $^1\text{H}$ - $^1\text{H}$  COSY spectrum of **3** in methanol- $d_4$  at 700 MHz.

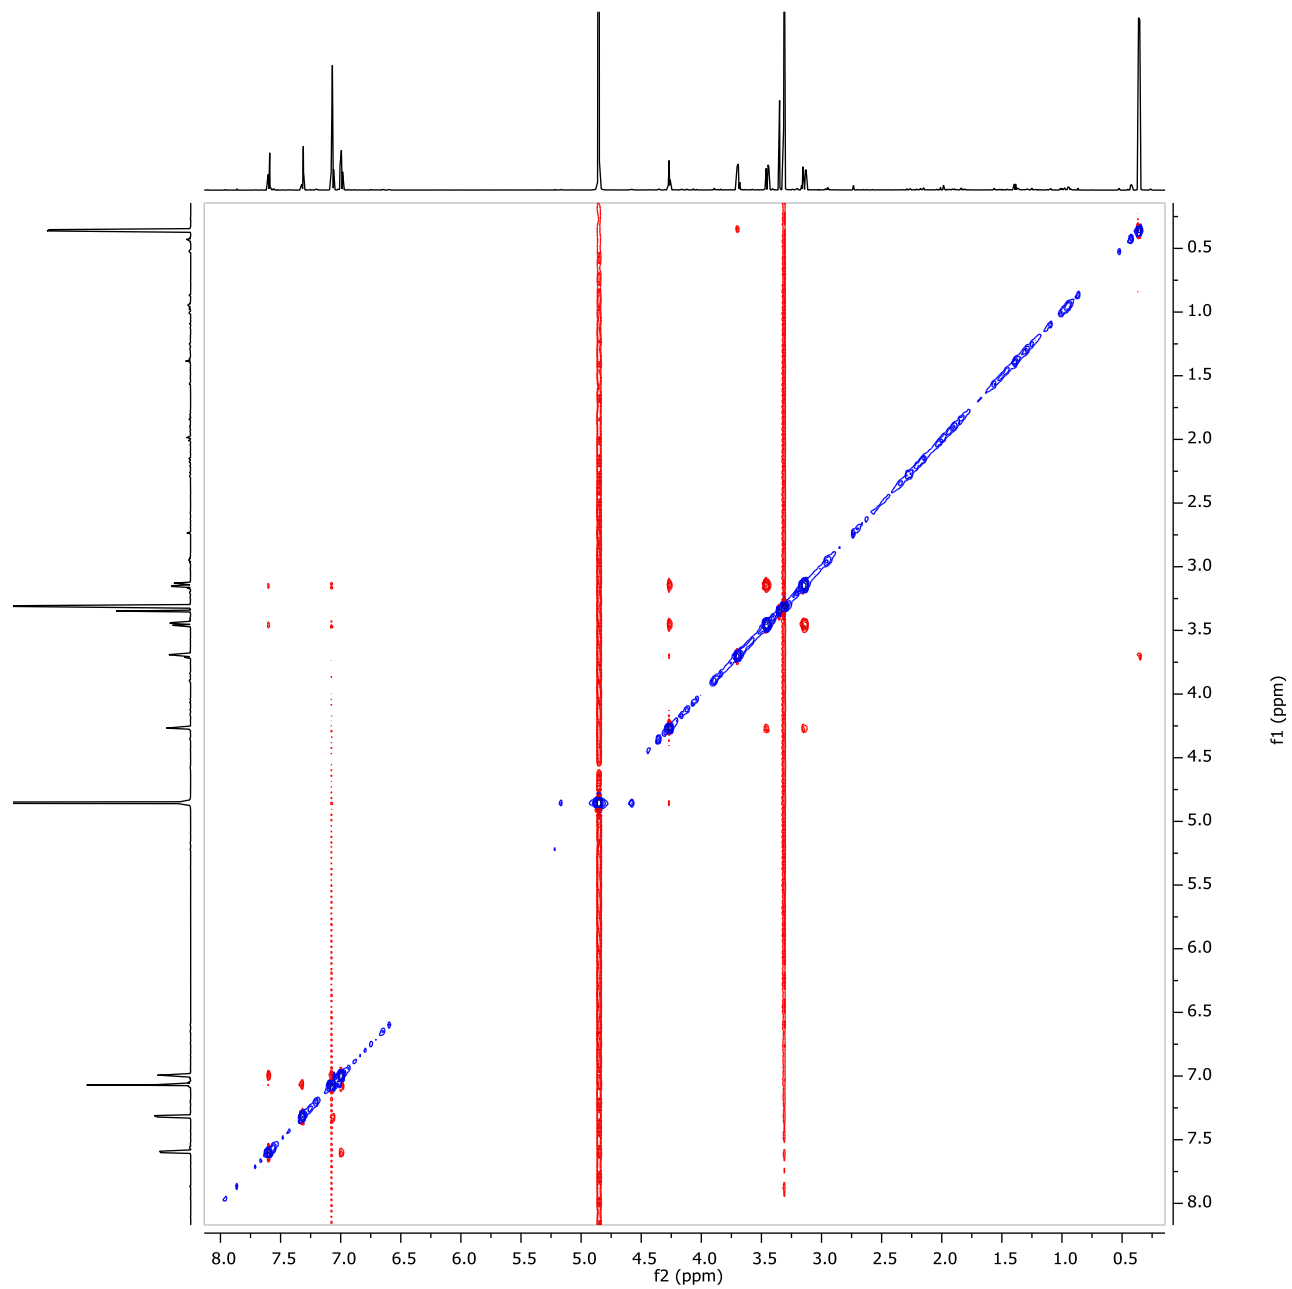

Figure S25. ROESY spectrum of **3** in methanol-*d*<sub>4</sub> at 700 MHz.

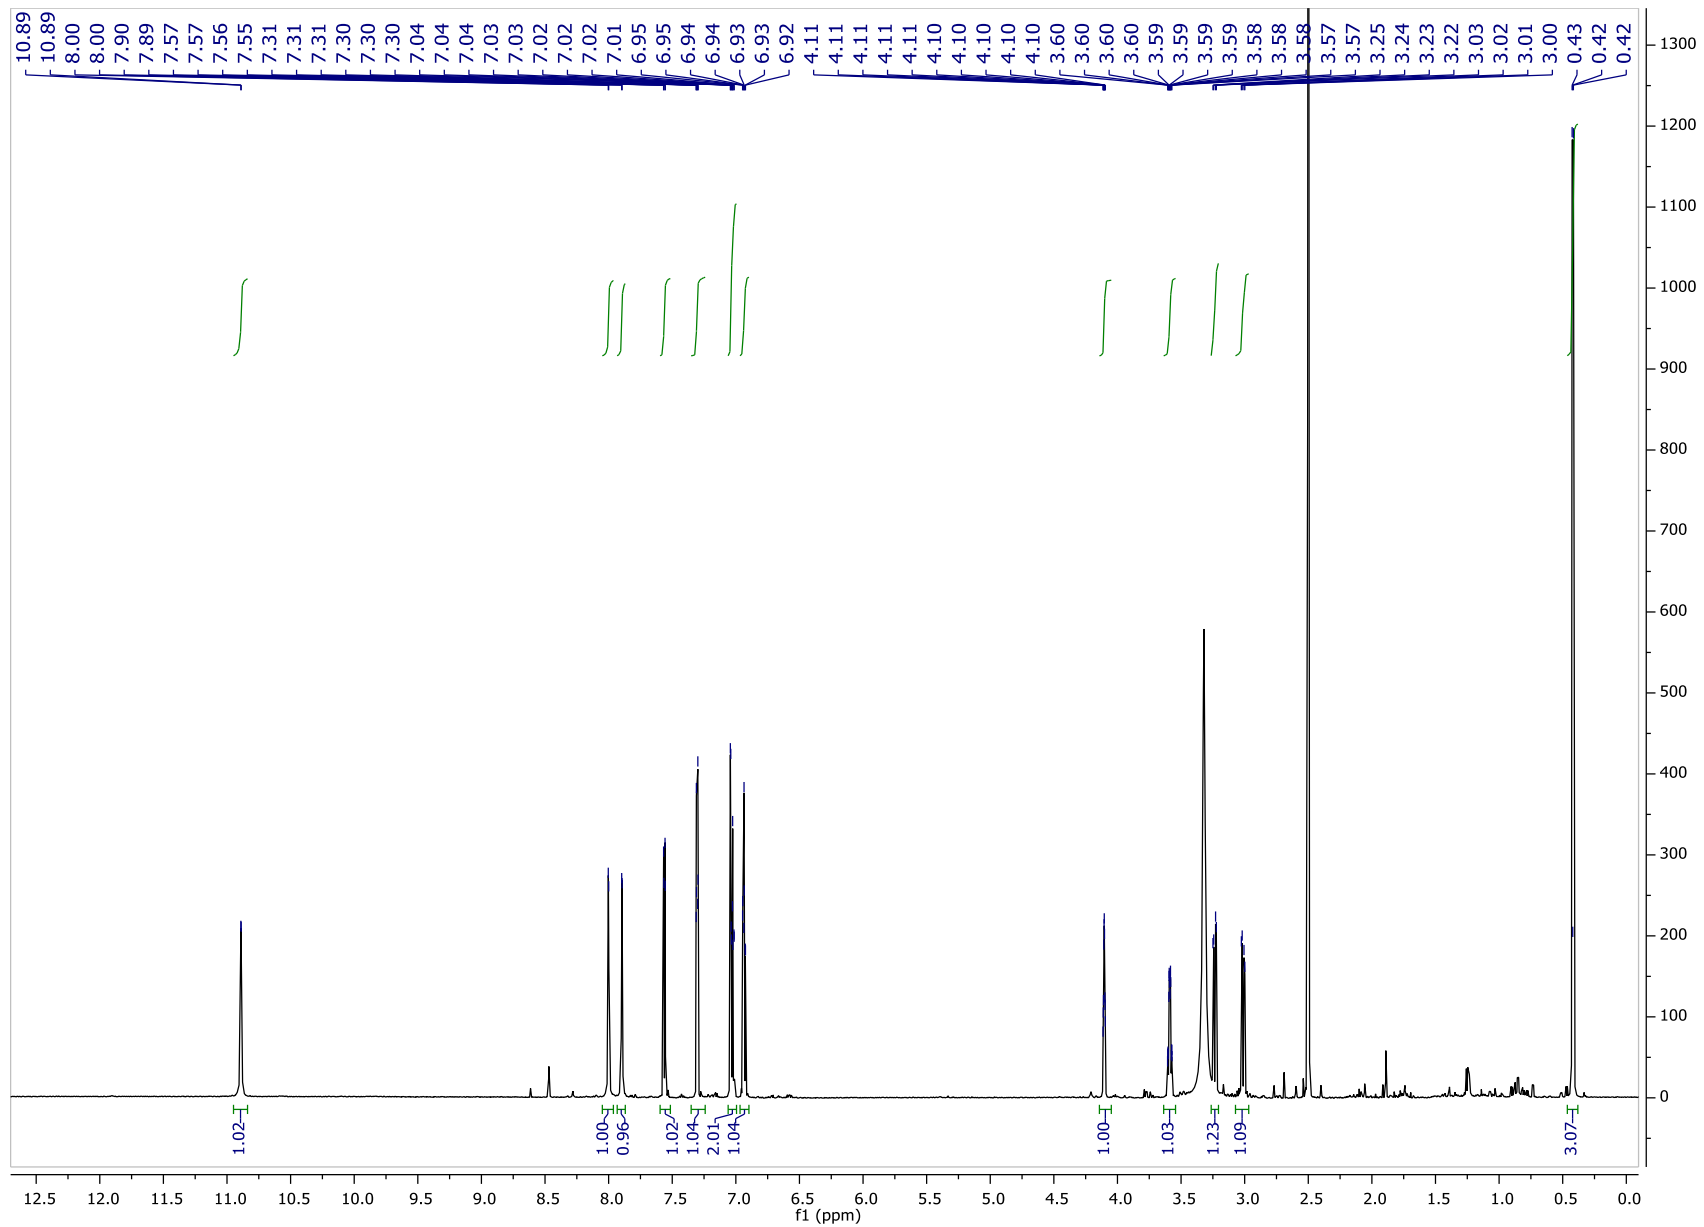

Figure S26.  $^1\text{H}$  NMR spectrum of **3** in  $\text{DMSO-}d_6$  at 700 MHz.

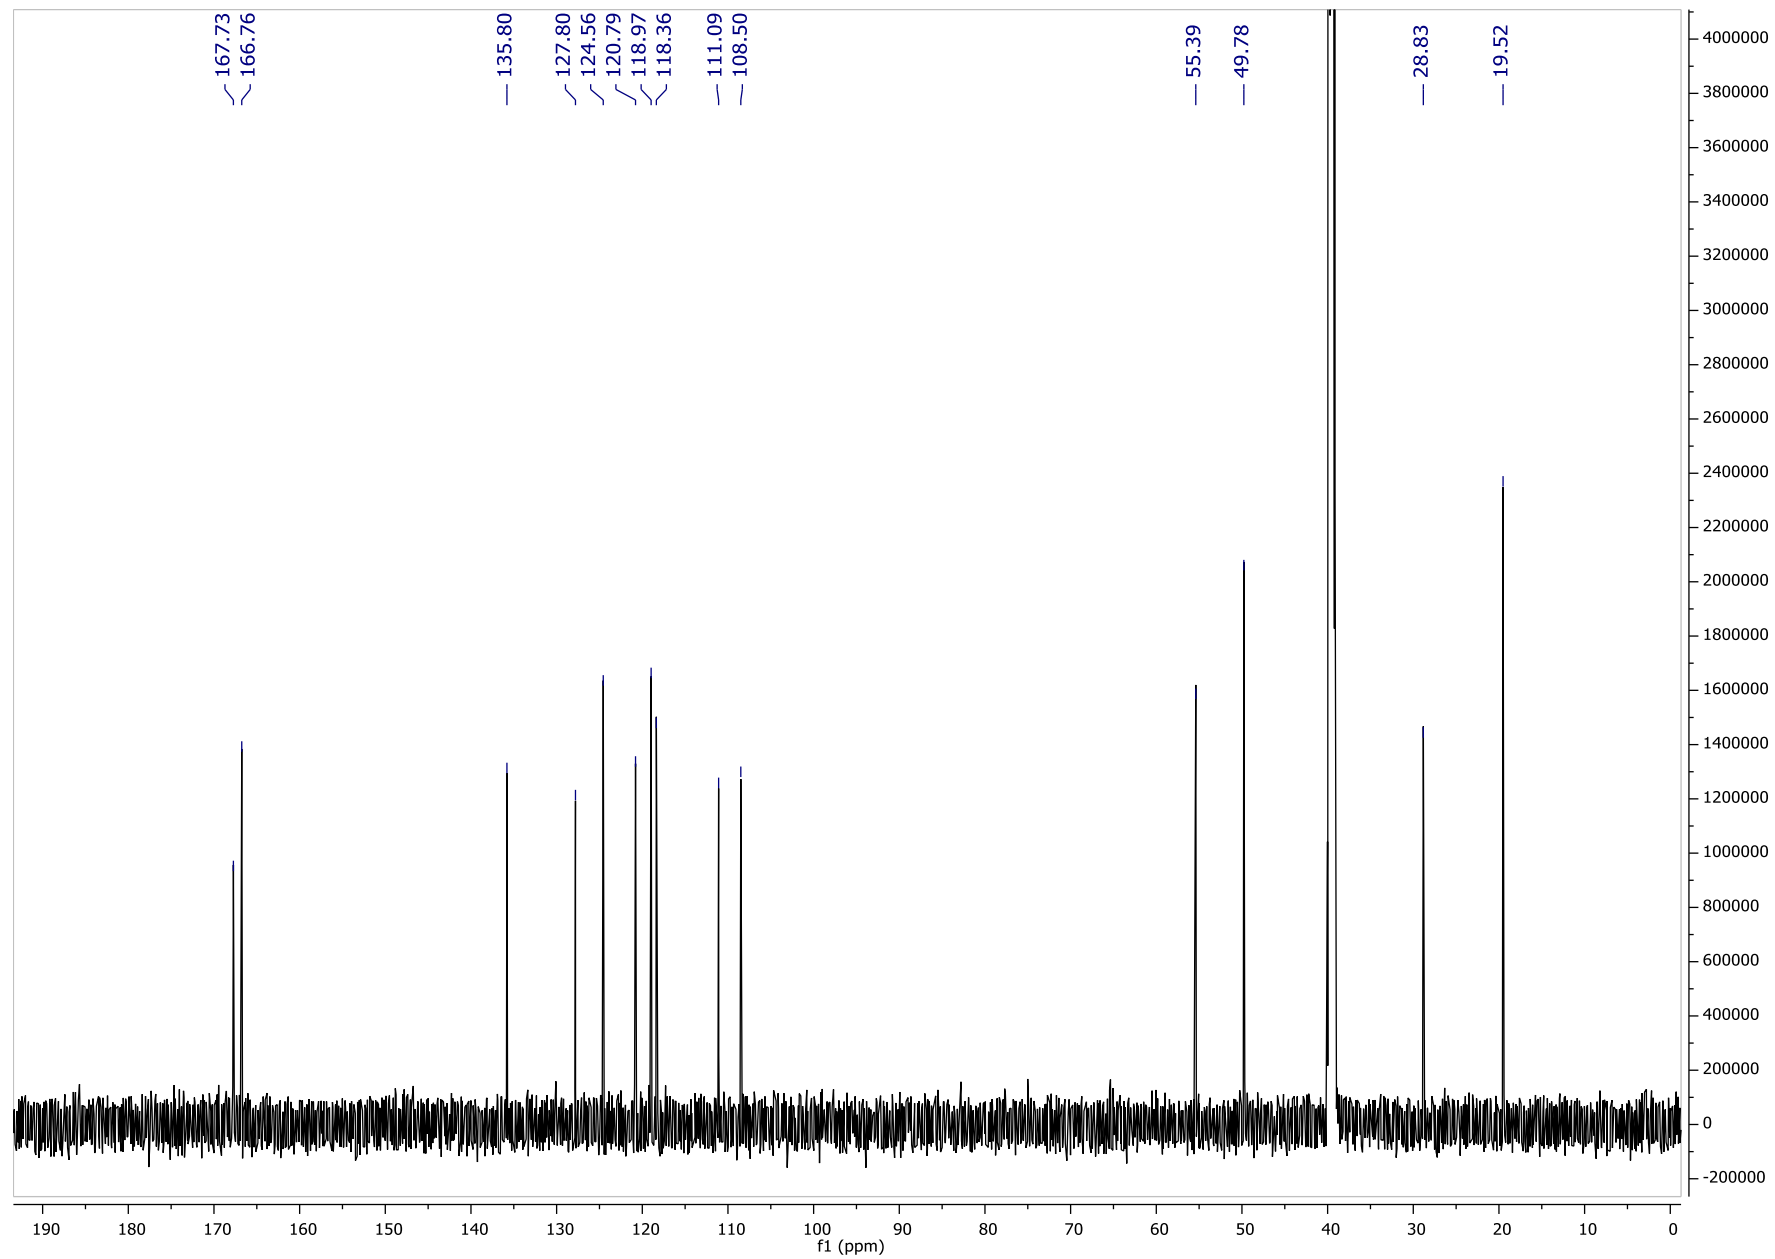

Figure S27.  $^{13}\text{C}$  NMR spectrum of **3** in  $\text{DMSO-}d_6$  at 175 MHz.

# Generic Display Report

## Analysis Info

Analysis Name S:\DATA\AmaZon\sel22\_Sherif Elsayed\21-0003\_B13 30 MG\gilsonB13\_v58\_BD6\_01\_43480.d  
Method 43480.m  
Sample Name gilsonB13\_v58  
Comment

Acquisition Date 01.12.2022 12:04:05  
Operator esu  
Instrument amaZon speed

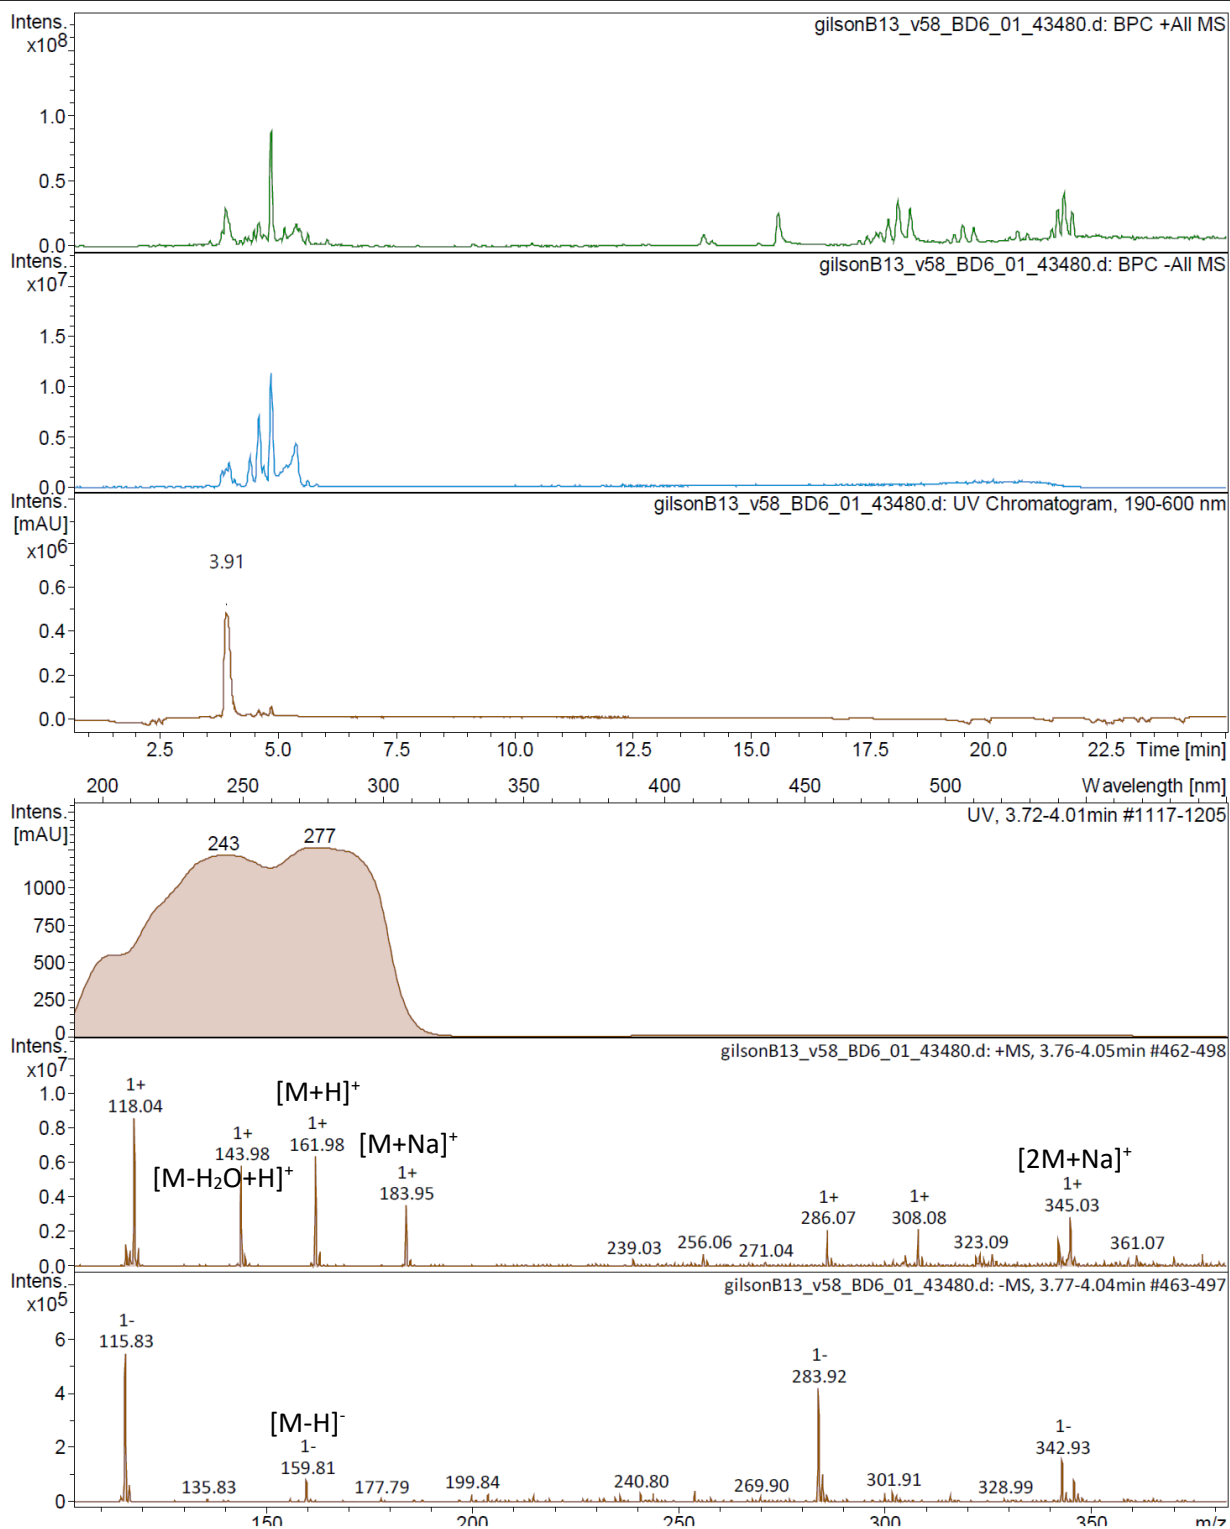

Figure S28. LRESIMS of 4.

# Generic Display Report

## Analysis Info

Analysis Name S:\DATA\MaXis\sel22\_Sherif Elsayed\22\_12\B13\_Vial 50\_57\_01\_11157.d  
Method pos\_säure\_10000\_screening\_ms\_100\_2500\_line.m  
Sample Name B13\_Vial 50  
Comment Screening01  
Waters Acquity UPLC BEH C\_18 1,7um 2.1x50mm

Acquisition Date 07.12.2022 17:08:01  
Operator ate06  
Instrument maXis

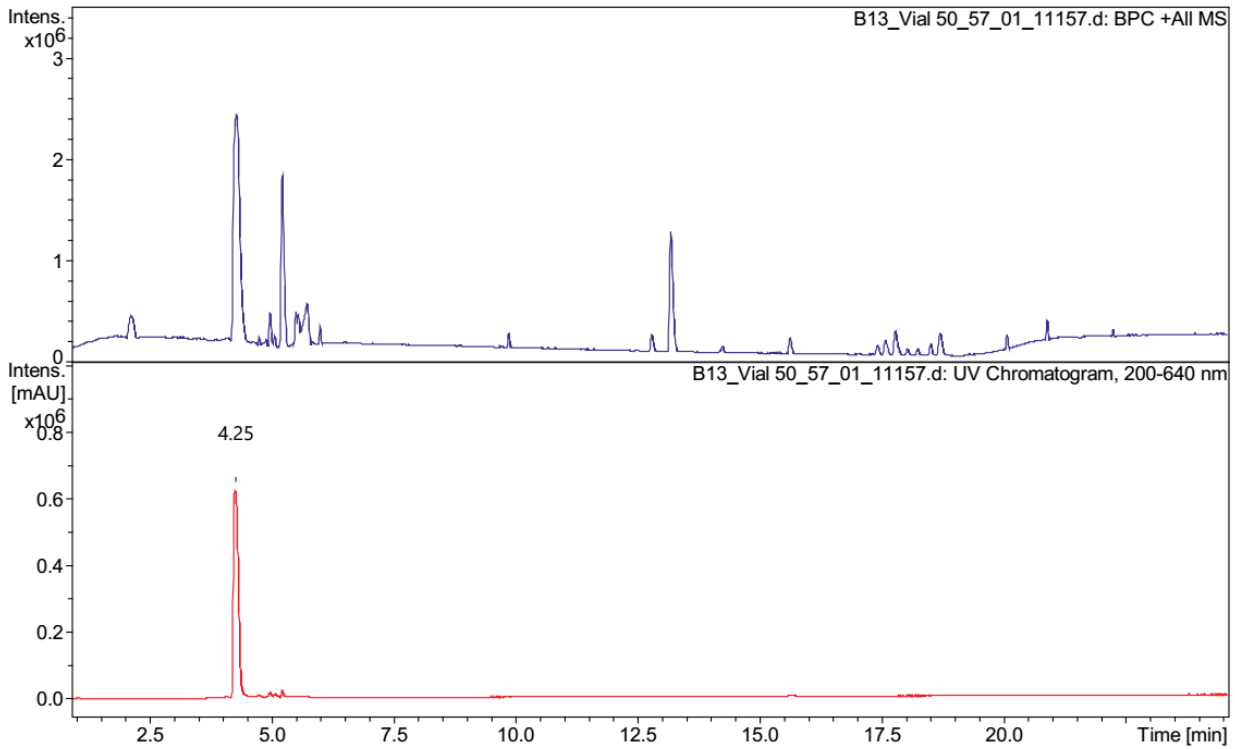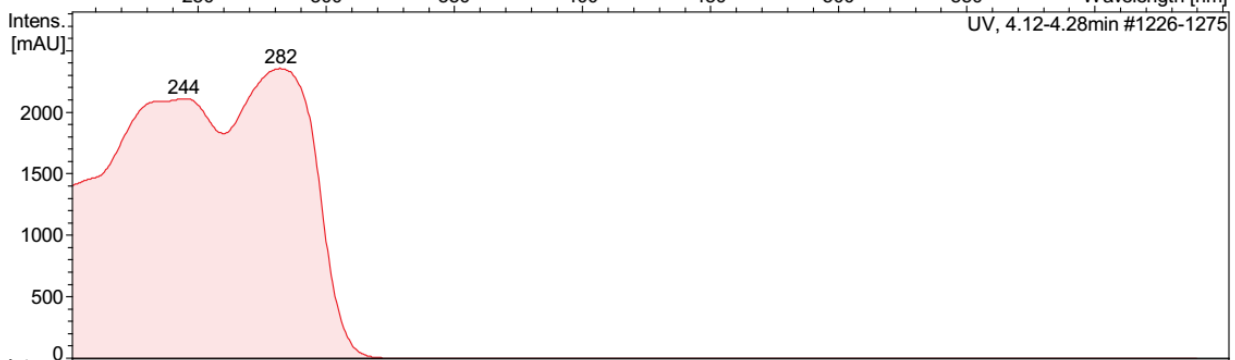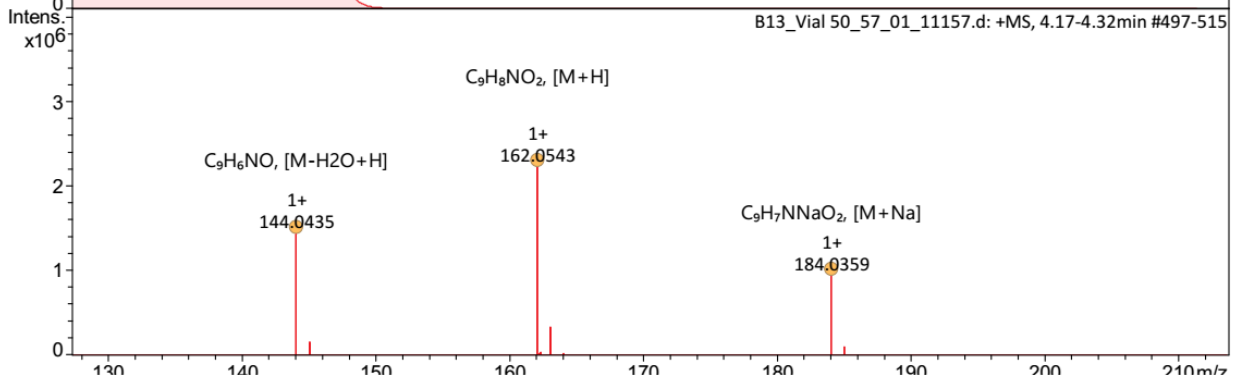

Figure S29. HRESIMS of 4.



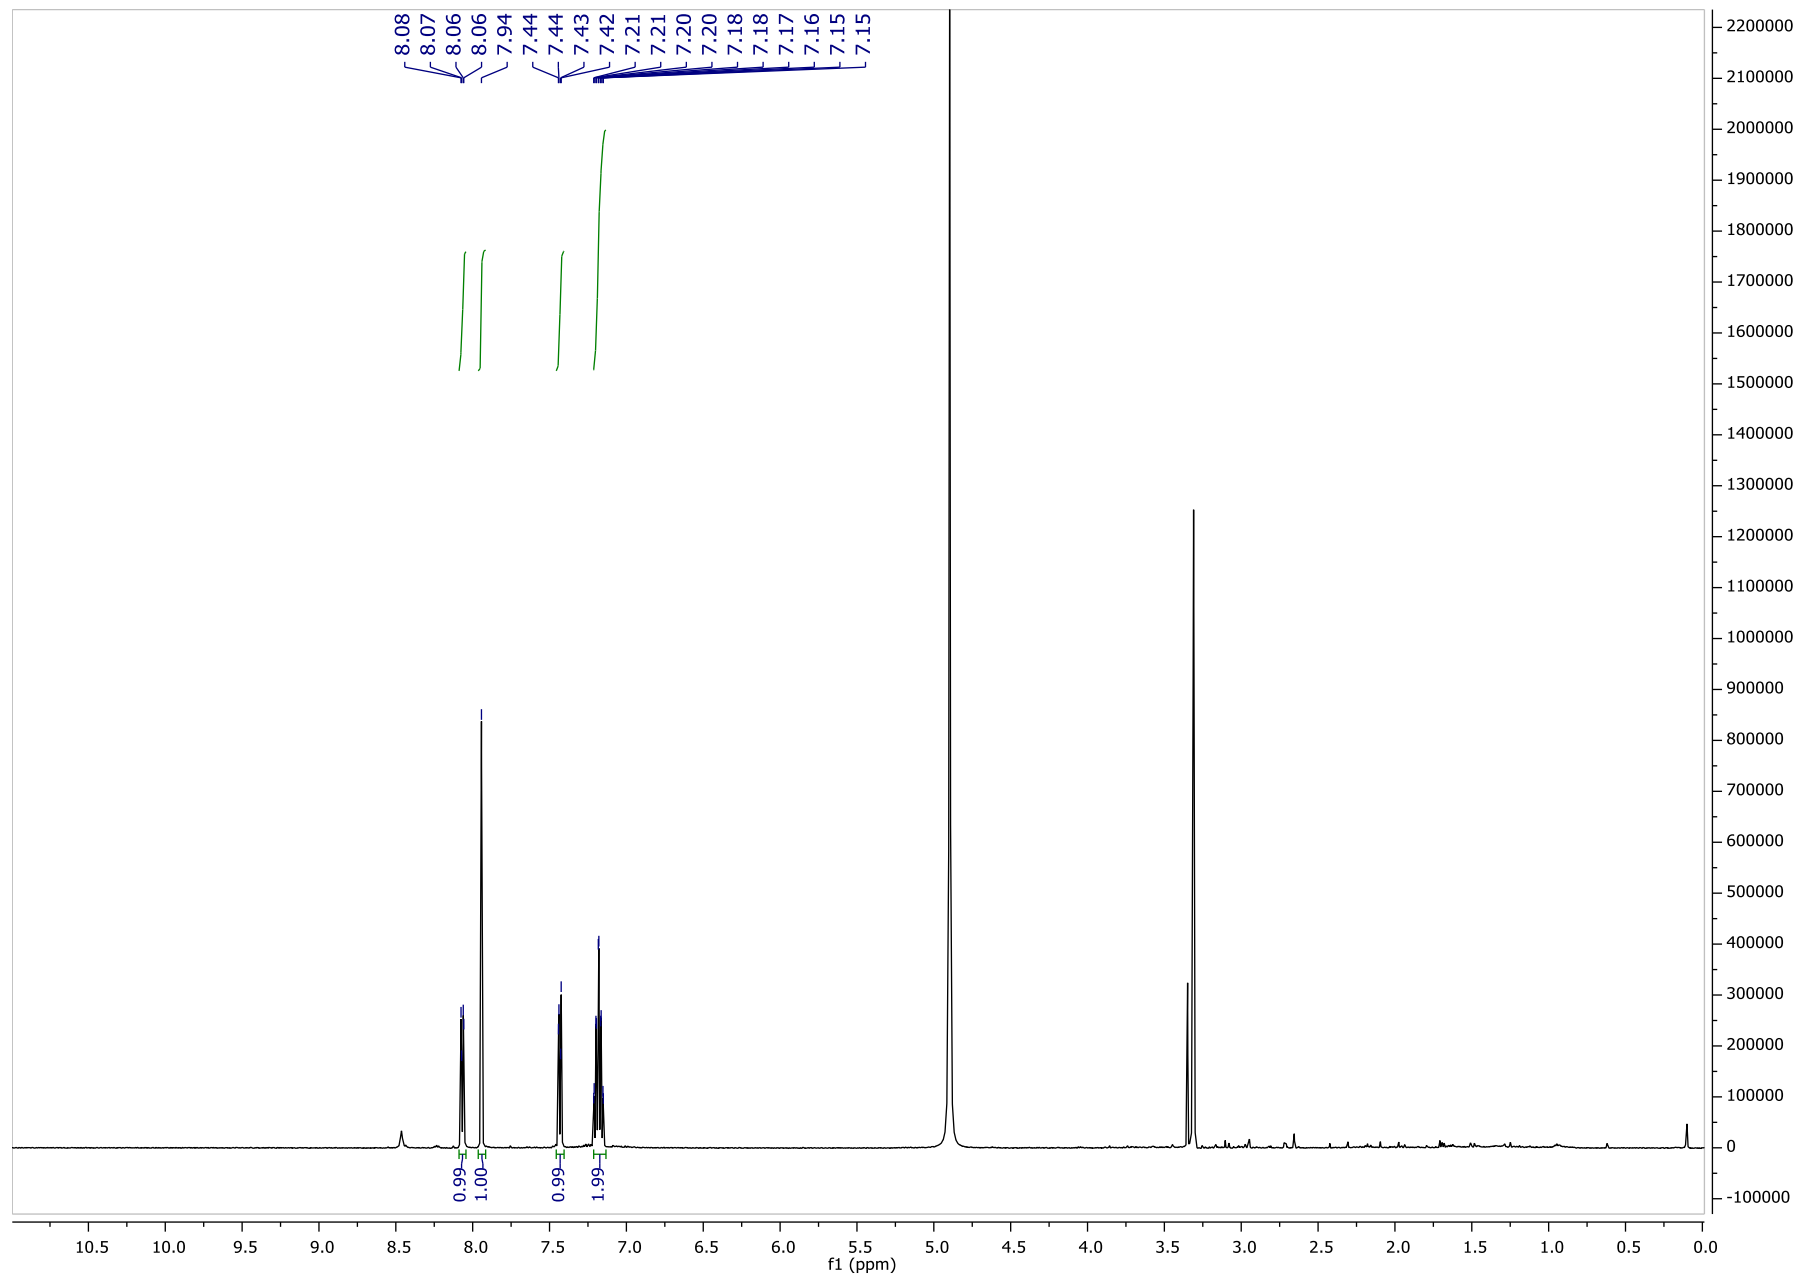

Figure S30.  $^1\text{H}$  NMR spectrum of **4** in  $\text{methanol-}d_4$  at 500 MHz.

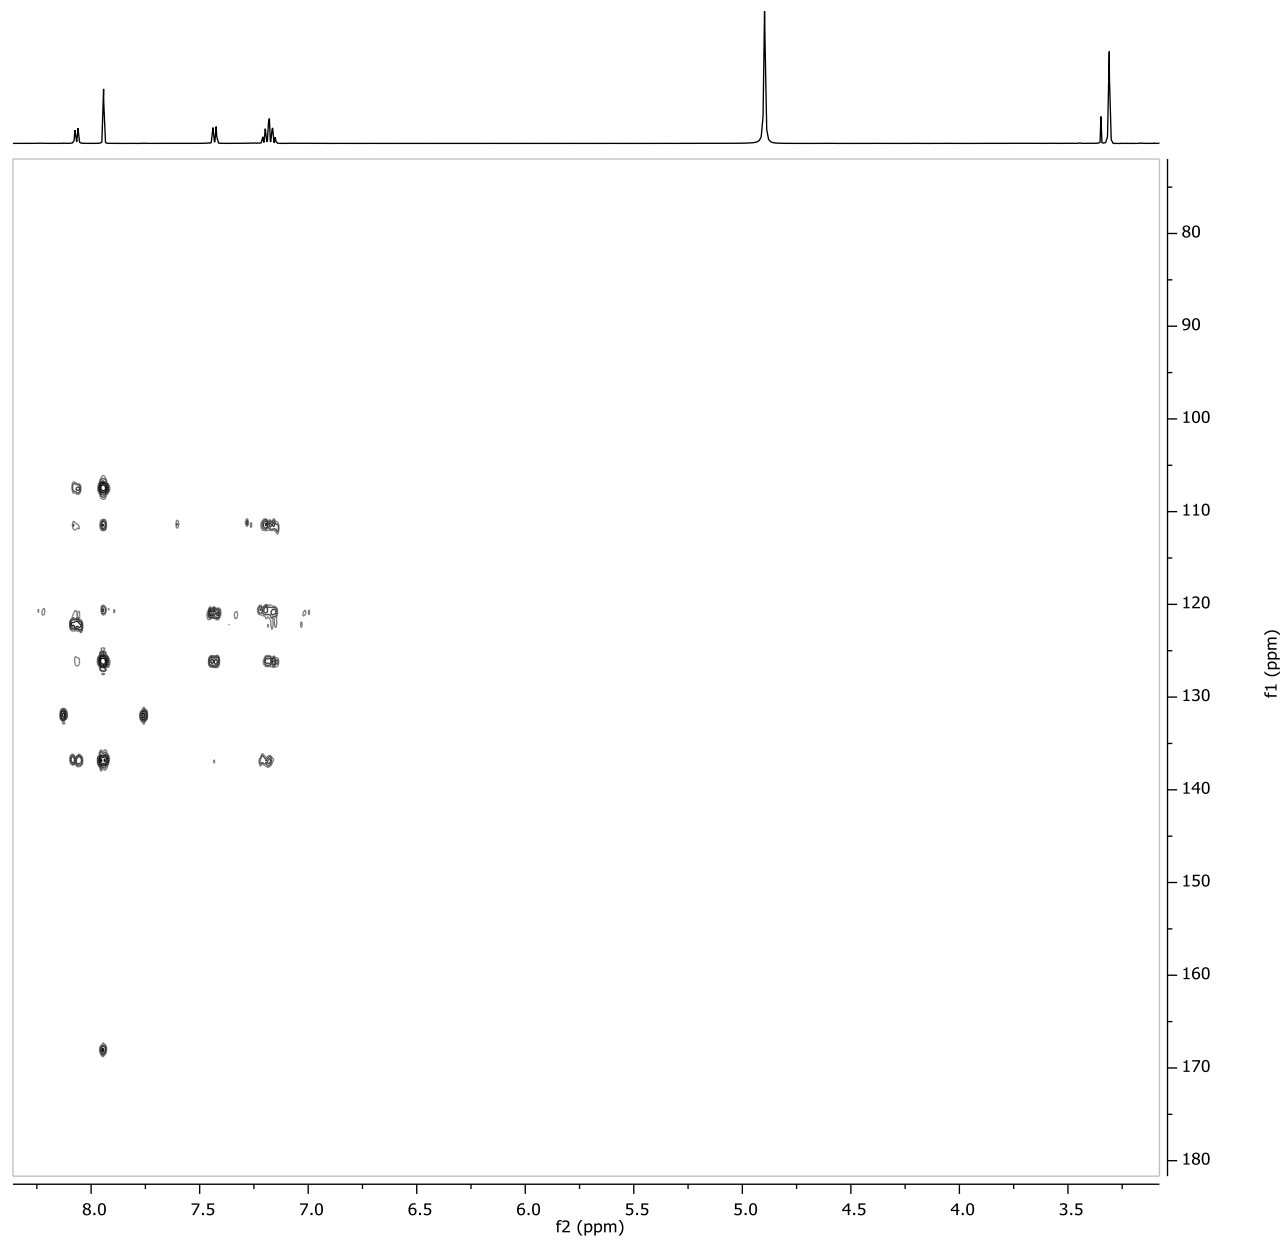

Figure S31. HMBC spectrum of **4** in methanol-*d*<sub>4</sub> at 500 MHz.

# Generic Display Report

## Analysis Info

Analysis Name S:\DATA\AmaZon\sel22\_Sherif Elsayed\21-00003 gillson\_2nd\21-0003 B18\_BC4\_01\_42944.d  
Method 42944.m  
Sample Name 21-0003 B18  
Comment

Acquisition Date 11.11.2022 01:53:49  
Operator esu  
Instrument amaZon speed

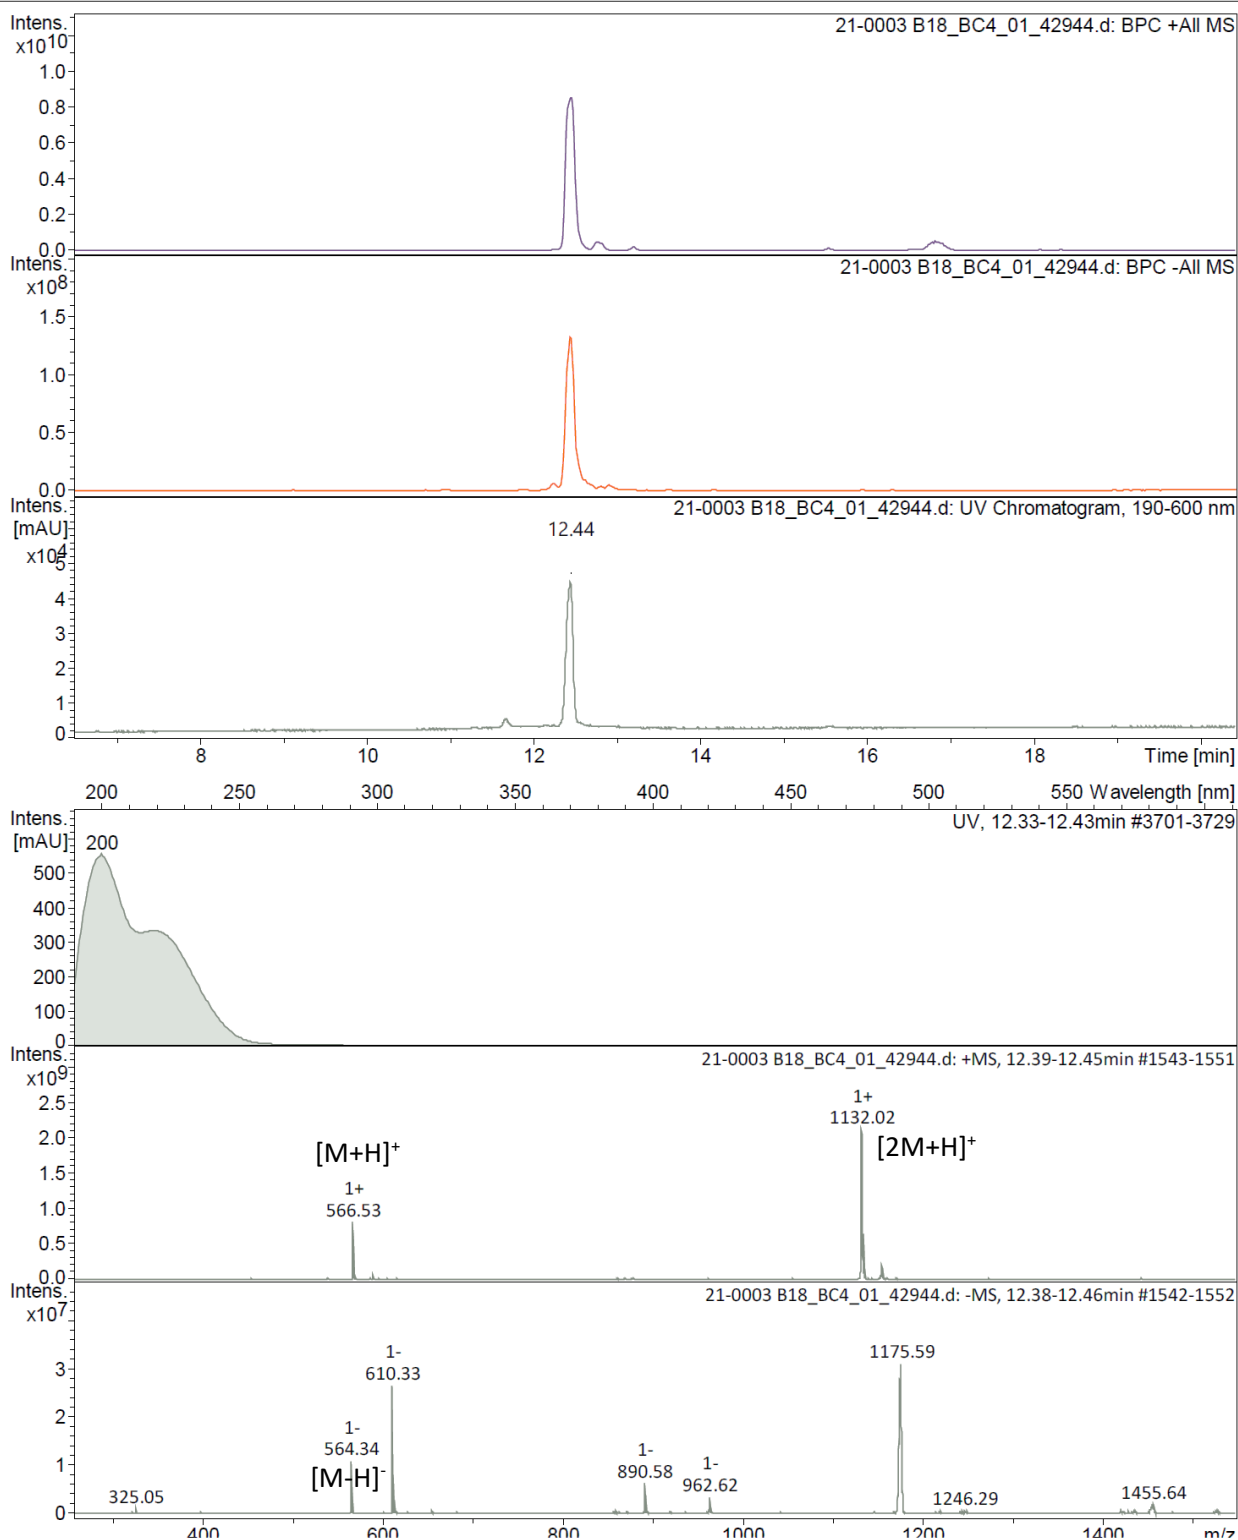

Figure S32. LRESIMS of 5.

# Generic Display Report

## Analysis Info

Analysis Name S:\DATA\Maxis\sel22\_SherifElsayed\22\_11\_MAxis\21-003\_B18\_19\_01\_11052.d  
Method pos\_säure\_10000\_screening\_ms\_100\_2500\_line.m  
Sample Name 21-003\_B18  
Comment Screening01  
Waters Acquity UPLC BEH C\_18 1,7um 2.1x50mm

Acquisition Date 23.11.2022 09:01:14  
Operator ate06  
Instrument maXis

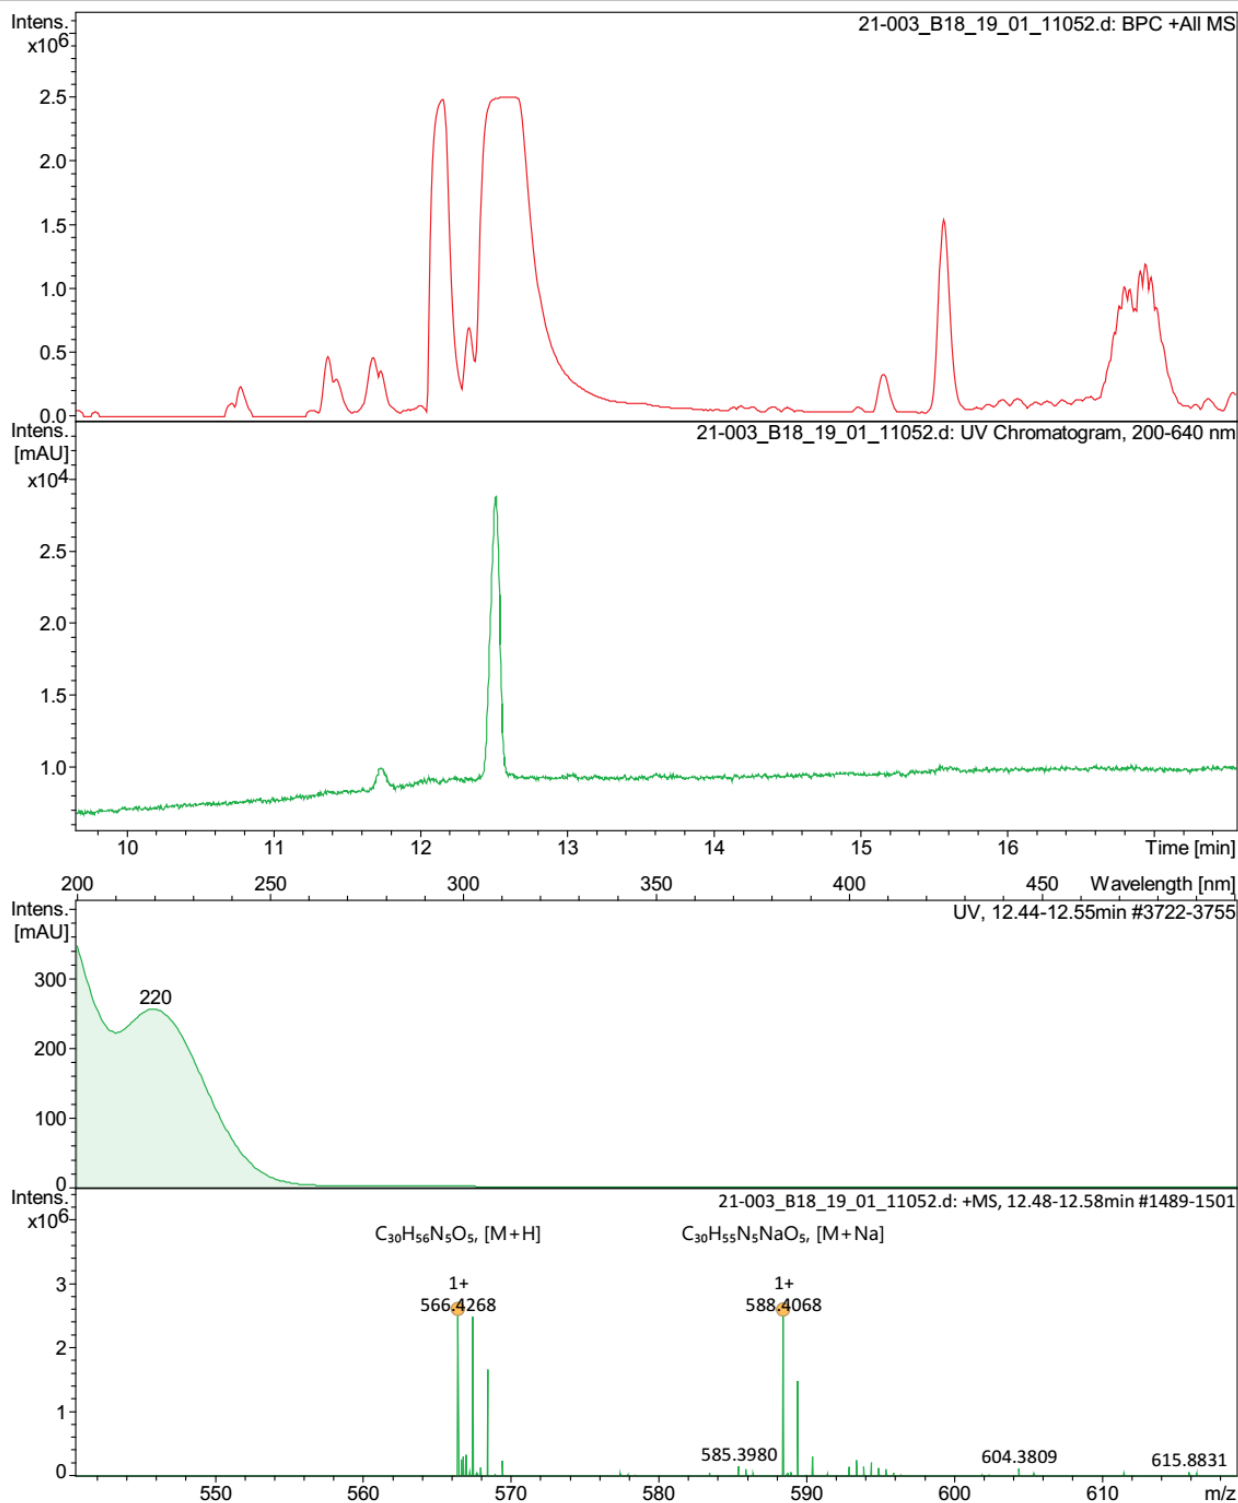

Figure S33. HRESIMS of 5.

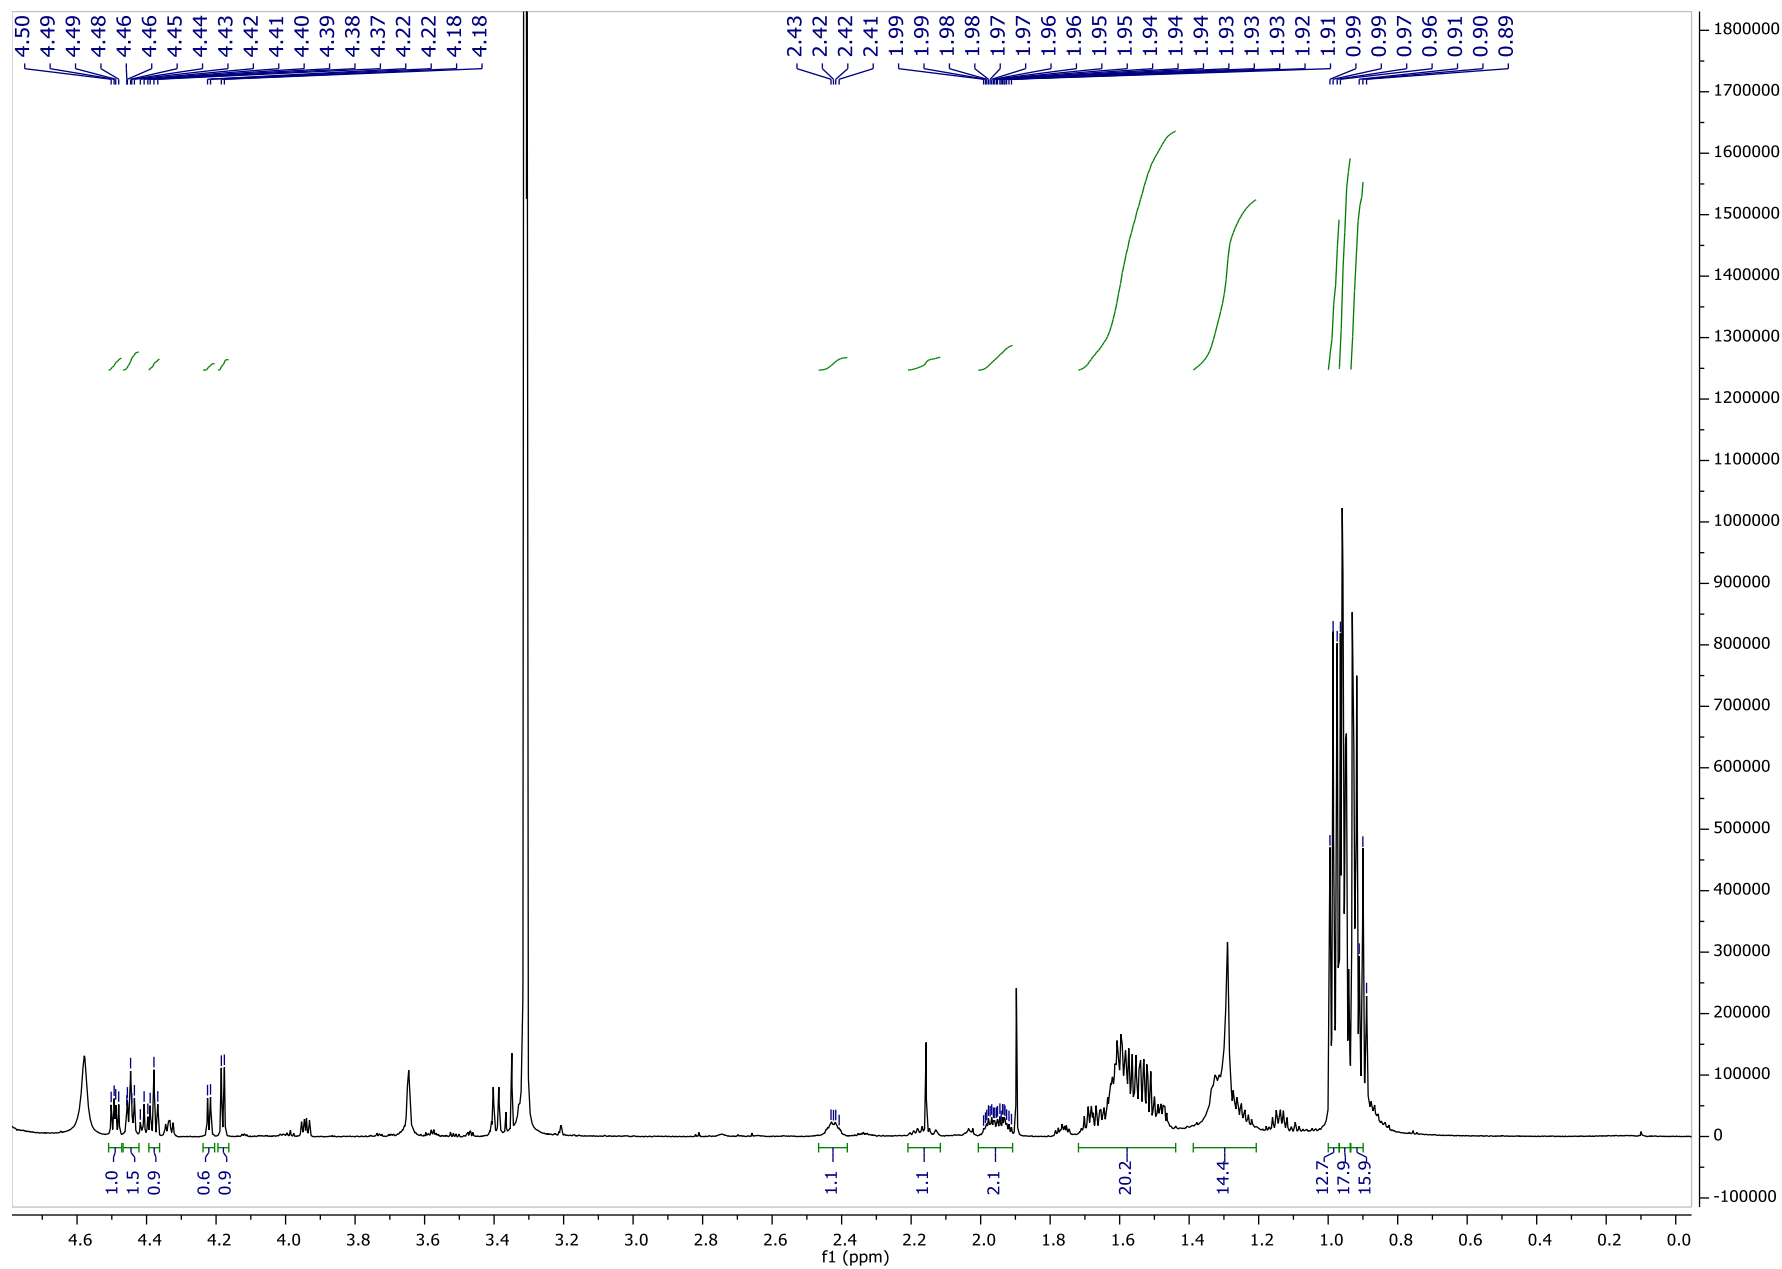

Figure S34.  $^1\text{H}$  NMR spectrum of **5** in methanol- $d_4$  at 700 MHz.

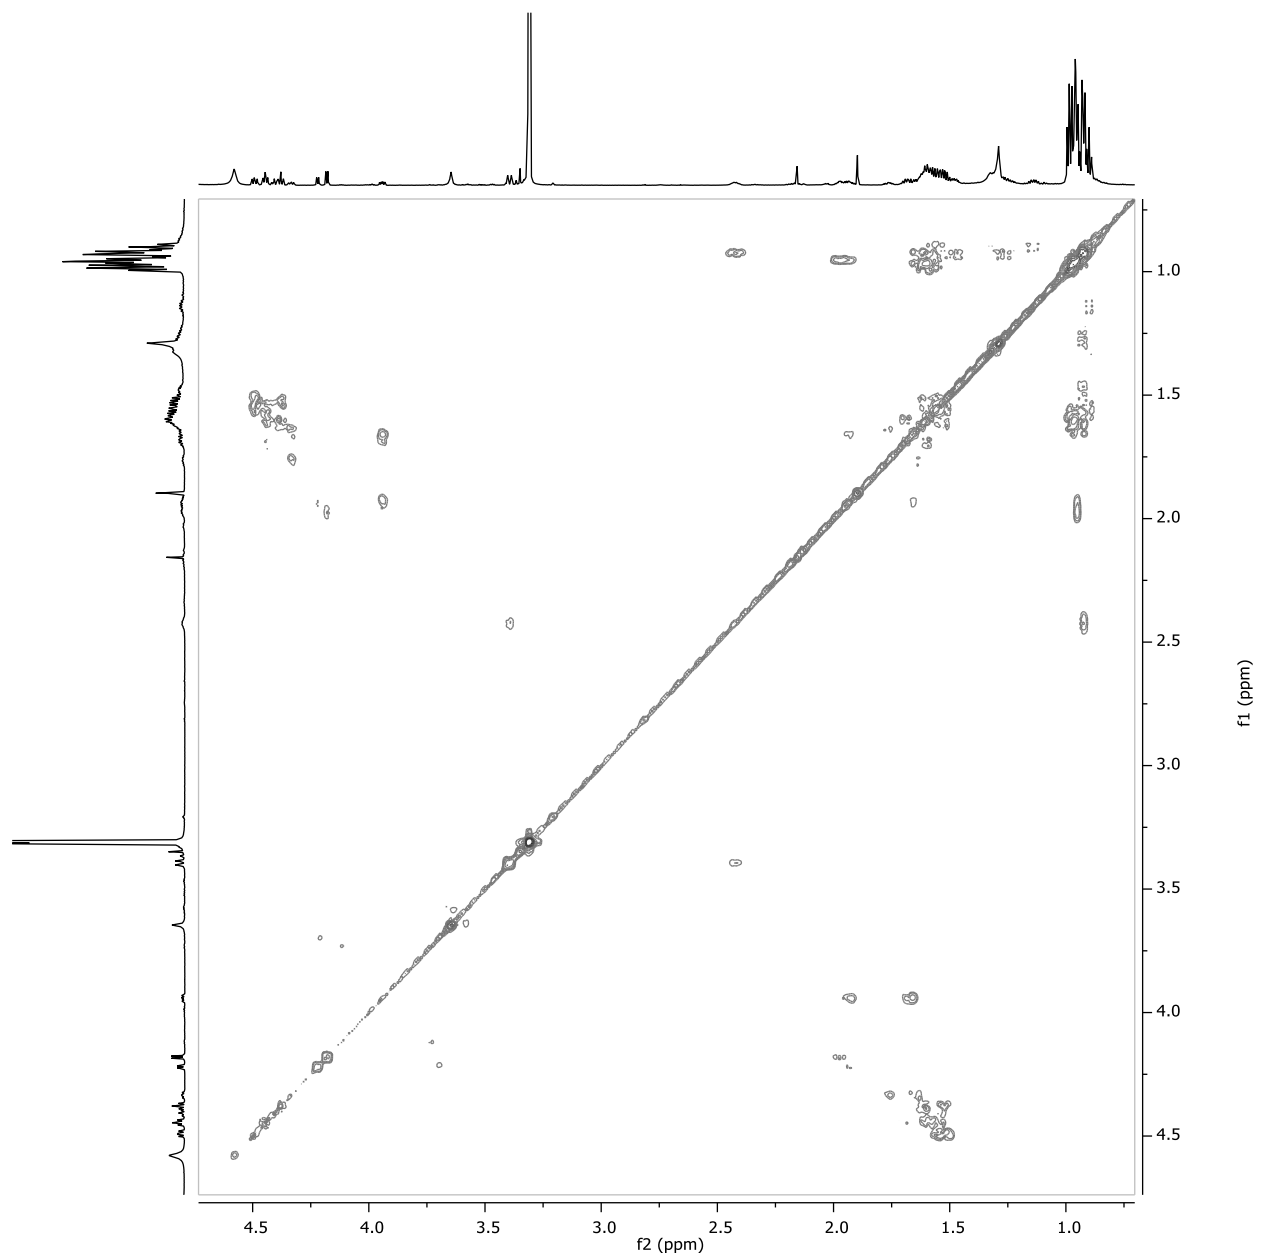

Figure S35.  $^1\text{H}$ - $^1\text{H}$  COSY spectrum of **5** in methanol- $d_4$  at 700 MHz.

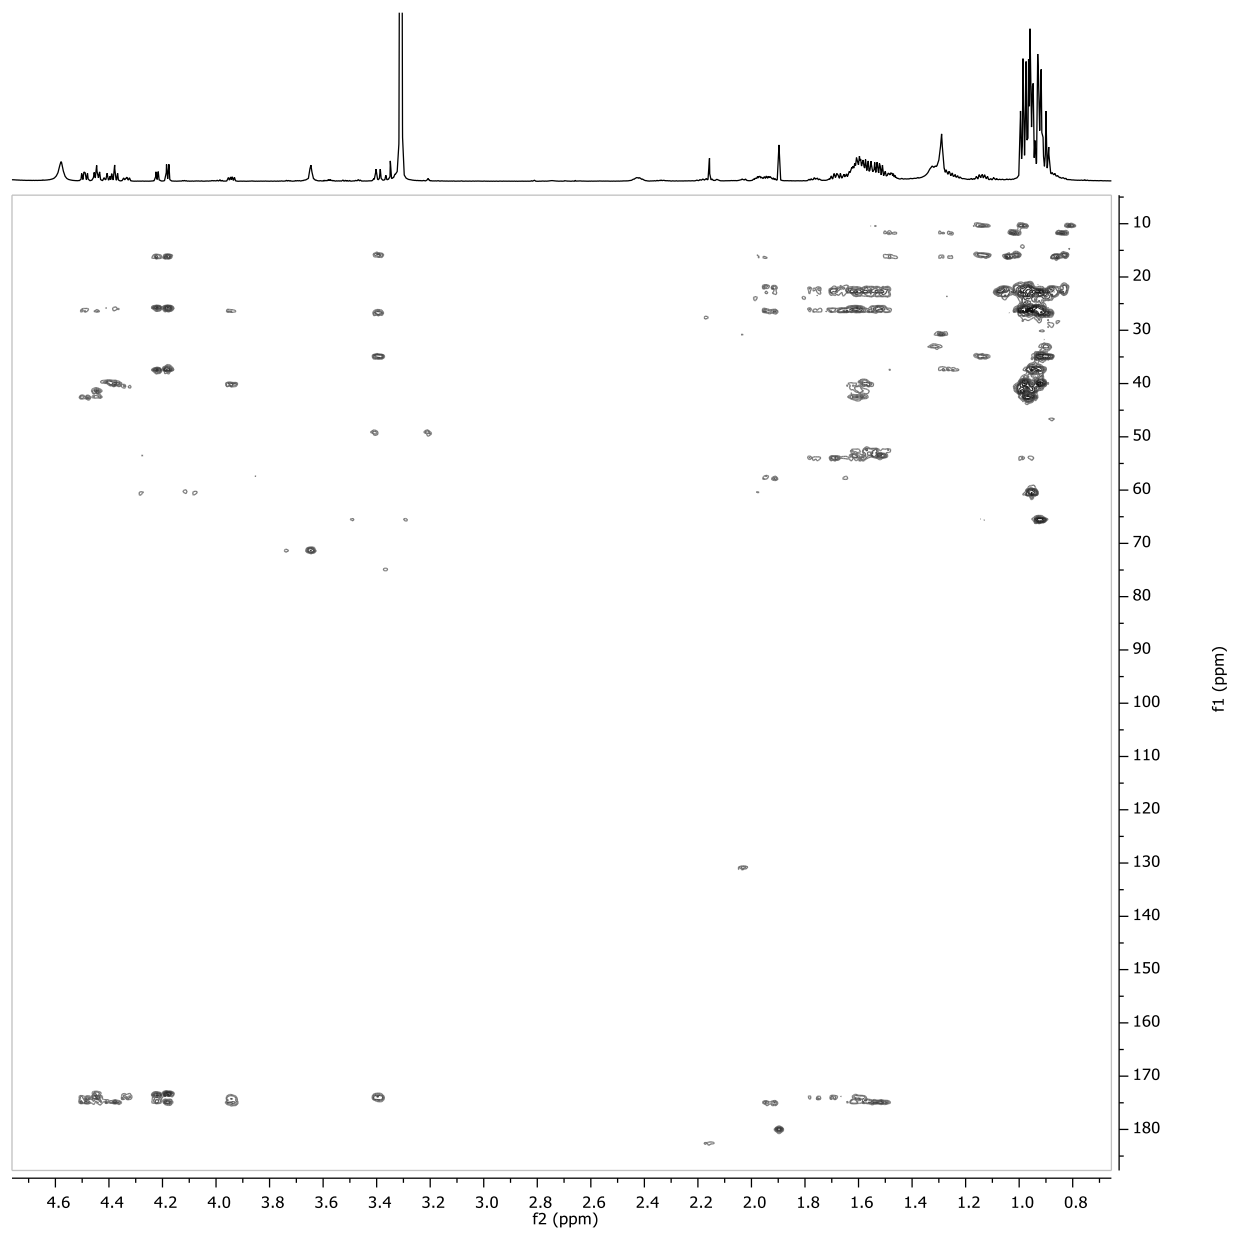

Figure S36. HMBC spectrum of **5** in methanol- $d_4$  at 700 MHz.

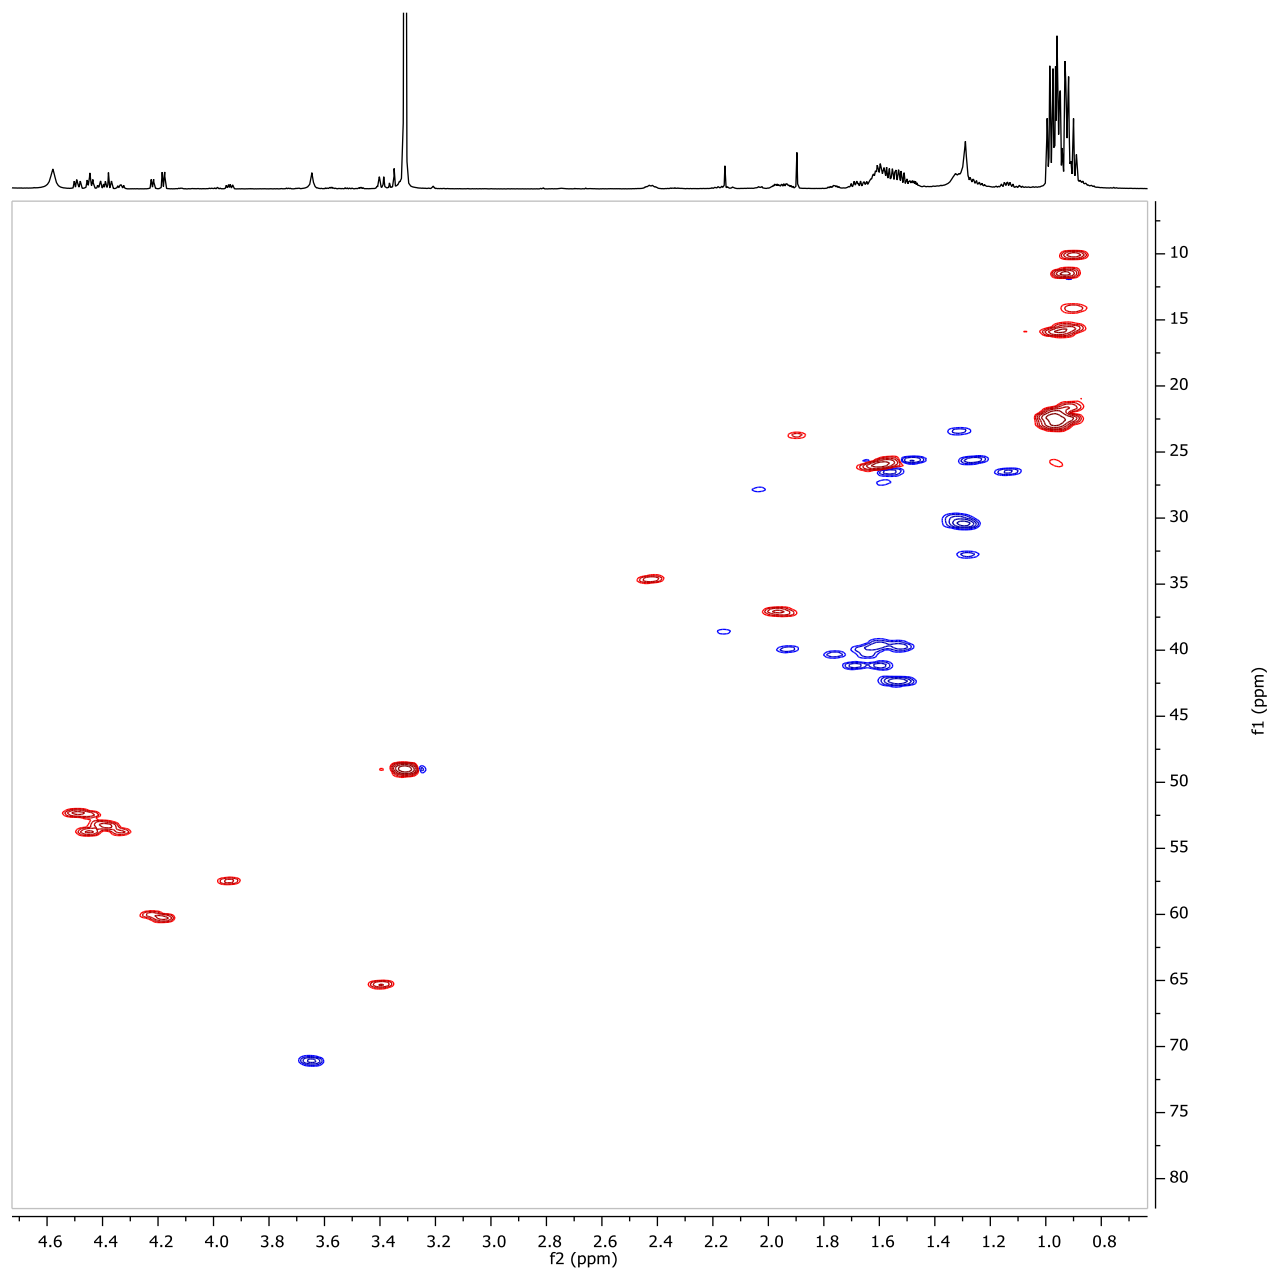

Figure S37. HSQC spectrum of **5** in methanol-*d*<sub>4</sub> at 700 MHz.
